1 Original paper submitted to “Plant Cell Reports”

2 **Characterization of a novel vascular bundle localizing *Gossypium hirsutum* NAC4**  
3 **transcription factor promoter for its role in environmental stress responses**

4 **Authors:**

5 Trishla Shalibhadra Vikas<sup>1</sup> (ORCID: 0000-0003-2437-1503), Sureshbabu Marriboina<sup>1</sup>, Prasanna Boyidi<sup>1</sup>, Padmaja  
6 Gudipalli<sup>1</sup>, Pulugurtha Bharadwaja Kirti<sup>1\*</sup>

7 **Authors and affiliations:**

8 1 Department of Plant Sciences, School of Life Sciences, University of Hyderabad, Hyderabad, Telangana, 500046  
9 India.

10 \* Corresponding author. Email id: pbkirti@yahoo.com

11 **Key message:**

12 GhNAC4 transcription factor from cotton, localizes to vascular bundles and is highly upregulated by phytohormones  
13 and environmental stresses.

14 **Abstract:**

15 We have studied the expression of *GhNAC4*, a NAC domain-containing transcription factor from *Gossypium*  
16 *hirsutum*. The expression of *GhNAC4* was upregulated by ABA, cytokinin, JA, GA, auxin, and ethylene. Its  
17 expression was also highly induced by drought, osmotic stress, oxidative stress, salinity, high and low-temperature  
18 stress, and wounding. To corroborate these observations, we have conducted a spatio-temporal analysis of the  
19 promoter of the *GhNAC4* gene, by using *uidA* (GUS) gene in a transcriptional fusion in transgenic tobacco. The  
20 GUS expression was mostly localized to the vascular bundles along with shoot apical meristem and guard cells. We  
21 also observed intense staining in other cells upon wounding. Sequence analysis of the promoter revealed the  
22 presence of several motifs pertaining to phytohormone responsiveness, stress-inducibility, light responsive, sugar-  
23 responsive and tissue-specificity. These data suggests that GhNAC4 is a vascular tissue localizing NAC  
24 transcription factor, which may act as a node integrating environmental stress signals for modulating plant growth  
25 and development with the aid of phytohormonal stimuli.

26 **Keywords:**

27 NAC transcription factor, promoter characterization, vascular bundle localization, phytohormones, environmental  
28 stress

## 1 **Abbreviations:**

- 2 4-MU 4-Methylumbelliferone
- 3 ABA Abscisic acid
- 4 BAP 6-Benzyl aminopurine
- 5 GA Gibberellic acid
- 6 GUS  $\beta$ -Glucuronidase
- 7 IAA Indole-3-acetic acid
- 8 MeJA Methyl Jasmonic acid
- 9 MUG 4-Methylumbelliferyl- $\beta$ -Dglucuronide
- 10 MV Methyl viologen
- 11 NAC NAM ATAF CUC
- 12 PEG Polyethylene glycol
- 13 SA Salicylic acid
- 14 TF Transcription factor

## 15 **Introduction:**

16 Plants have developed intricate mechanisms for sensing various environmental stresses and suitably responding to  
17 them. These stresses can induce a wide range of local and long-distance signals, which have to be synchronized and  
18 integrated into the signal transduction pathway at the whole plant level (Tran et al. 2007). The processes like growth  
19 and development have to be regulated in the plant for it to tolerate and survive under stress (Chaves et al. 2002). One  
20 of the most common ways for a plant to connect local stimuli to systemic responses is via the regulation of  
21 phytohormone levels, which in turn regulate gene expression (Verma et al. 2016). Understanding hormonal cross  
22 talk is thus vital to deciphering how plants activate the required set of responses to a particular stress condition. The  
23 first step to achieve this goal is to identify the regulatory components of signaling pathways (Tian & Lu 2006).  
24 Transcription factors (TFs) function as regulatory trans-acting proteins that bind to specific *cis*-acting elements in  
25 the promoters of target genes and lead to the activation or repression of gene expression. Hence, the expression  
26 pattern of a given gene is a direct consequence of the promoter function, and *cis*-acting elements are important  
27 molecular switches that play a crucial role in transcriptional regulation (Yamaguchi-Shinozaki & Shinozaki 2005).  
28 They control a complex and dynamic network of gene expression, which affects biological processes. Accurate  
29 functional analysis of *cis*-acting elements would help to understand the complex gene regulatory networks  
30 underlying plant adaptation to stress (Yamaguchi-Shinozaki & Shinozaki 2005). The identification of stress-  
31 inducible and tissue-specific promoters is of significant theoretical and practical importance, as they would eliminate  
32 the need for deployment of constitutive promoters that cause unnecessary metabolic penalties in transgenic plants  
33 (Venter 2007).

1 Vascular tissues consist of xylem and phloem, and are derived from the meristematic vascular procambium and  
2 cambium. The proliferation of cambium, development, differentiation, and patterning of vascular tissue requires a  
3 hormonal response, transcriptional regulators, and peptide signaling components. Various transcription factors (TFs)  
4 like NAC, MYB, and HD-ZIP have been implicated in vascular bundle development (Yang & Wang 2016).

5 NAC (NAM ATAF CUC) TFs constitute one of the largest plant-specific TF super-family with 171 members in  
6 Arabidopsis and 151 members in rice (Nuruzzaman et al. 2010). So far 283 NAC genes in *Gossypium hirsutum*, 147  
7 in *G. arboreum*, 267 in *G. barbadense*, and 149 in *G. raimondii* have been identified (Sun et al. 2018). A typical  
8 NAC TF consists of two domains, a conserved N-terminal domain and a highly divergent C-terminal domain (Olsen  
9 et al. 2005). Previous studies have shown that NAC TFs play an important role in regulating a wide variety of  
10 biological processes such as shoot apical meristem development (Souer et al. 1996), seed development (Sperotto et  
11 al. 2009), leaf senescence (Guo & Gan 2006), flower development (Sablowski & Meyerowitz 1998), fibre  
12 development (Ko et al. 2007), abiotic stress response (Hu et al. 2006) and biotic stress response (Nakashima et al.  
13 2007).

14 The biological functions of NAC TFs in vascular development have been emerging recently. NAC TFs act as master  
15 switches regulating the vascular tissue differentiation and secondary cell wall formation (Wang & Dixon 2012).  
16 VASCULAR-RELATED NAC-DOMAIN1 (VND1) to VND7 are specifically expressed in vascular tissues. VND6  
17 and VND7 regulate the vessel differentiation at inner metaxylem and protoxylem in the roots respectively (Kubo et  
18 al. 2005). NAC SECONDARY WALL THICKENING PROMOTING FACTOR1 (NST1), NST2, and  
19 SECONDARY WALL-ASSOCIATED NAC DOMAIN PROTEIN 1 (SND1)/NST3/ANAC012 act as  
20 transcriptional switches and regulate secondary cell wall thickening in various tissues and are localized to xylary and  
21 extraxylary fibers in the inflorescence stem (Ko et al. 2007; Mitsuda et al. 2005; Mitsuda et al. 2007). XYLEM NAC  
22 DOMAIN 1 (XND1) is specifically expressed in xylem and negatively regulates tracheary element growth (Zhao et  
23 al. 2008). So far, very little information is available about the role of NAC TFs in vascular development in cotton.  
24 GhXND1, a cotton NAC TF is involved in negative regulation of xylem development. Ectopic expression of  
25 GhXND1 resulted in a decrease in the number of xylem vessels and reduction of interfascicular fibers thickness (Li  
26 et al. 2014). *GhFSN1* (fiber secondary cell wall-related NAC1) is expressed in cotton fibers and is important for  
27 secondary cell wall synthesis (Zhang et al. 2018).

28 Comprehensive expression analysis of NAC TFs would be useful in understanding their biological function.  
29 However, very few studies have investigated the spatio-temporal expression of NAC TFs during stress responses  
30 and development.

31 Cotton is one of the most widely cultivated and economically important crops and is a primary source of natural  
32 fiber. However, cotton-growing areas are prone to high and low temperatures, extreme drought, salinity, and pest  
33 infestation that can hinder cotton productivity. Very little information is available about the molecular mechanisms

1 regulating the responses of cotton plant to environmental stresses. Hence, advancements to accelerate stress  
2 tolerance are very important for cotton production.

3 GhNAC4 is one of the first reported NAC TF expressing in vascular bundles in cotton. To understand the molecular  
4 mechanisms regulating NAC TFs and accelerate the use of NAC TFs in engineering transgenic cotton, we have  
5 characterized the differential regulation of *GhNAC4*, isolated earlier by Meng et al. (2009). In this direction, we  
6 performed an expression analysis of *GhNAC4* in response to various environmental stress conditions and  
7 phytohormones treatments, identified putative *cis*-acting elements in the promoter region, and observed the spatio-  
8 temporal localization of *GhNAC4* in various plant developmental stages. Our findings show that GhNAC4 is a novel  
9 vascular bundle localizing NAC TF, which is responsive to environmental stress and phytohormone signals and  
10 might be involved in plant growth and development.

## 11 **Materials and methods:**

### 12 **Plant material and stress treatments:**

13 Cotton (*Gossypium hirsutum* var. JK Durga) seeds were surface sterilized with 70% ethanol for 2 min followed by  
14 4% sodium hypochlorite for 15 min. The seeds were then rinsed four times with sterilized water and soaked for 5-6  
15 h. The seeds were germinated and grown for two weeks on blotting water placed on top of 0.5X MS media without  
16 any growth regulators.

17 For hormonal treatments, the filter paper on which the seedlings were grown, was moistened with either  
18 100  $\mu$ M ABA, 100  $\mu$ M MeJA, 100  $\mu$ M SA, 20  $\mu$ M 6-BAP, 20  $\mu$ M GA<sub>3</sub> or 20  $\mu$ M IAA and incubated for 24 h prior  
19 to sampling. Untreated seedlings and filter paper moistened with water, having the same quantity of sodium  
20 hydroxide or alcohol used for dissolving the hormones were also used as controls. Ethylene treatment was carried  
21 out for 24 h by placing the seedlings on filter paper in a sealed container, and Ethephon was added to the box and  
22 diluted to a final concentration of 10 ppm in distilled water. Seedlings in a similar container having air were used as  
23 a control.

24 High salt and osmotic stress were induced by moistening the filter paper with 0.3 M NaCl and 0.3 M  
25 mannitol respectively, and the seedlings were allowed to grow for 24 h. Oxidative stress was induced by moistening  
26 the filter paper with 10  $\mu$ M methyl viologen and incubated for 24 h. For inducing drought stress, the seedlings were  
27 air dried for 30 min. Flooding stress was achieved by immersing the seedlings in distilled water for 24 h. For the  
28 wounding treatment, the leaves of seedlings were squeezed with a forceps, and the wounded seedlings were  
29 harvested after 30 min. For the combination of dark and cold treatment, the seedlings were wrapped in aluminum  
30 foil and incubated at 4 °C for 24 h, while the dark treatment was carried out at 25 °C for 24 h. In the high-  
31 temperature stress, the seedlings were subjected to 42 °C for 12 h. Following all the treatments, the leaves were  
32 immediately frozen in liquid nitrogen to analyze the expression levels of *GhNAC4* gene.



1 To determine the degree of promoter activation, homozygous T<sub>2</sub> tobacco seedlings were subjected to different  
2 hormonal treatments and environmental stresses following the same methodology as applied to cotton seedlings, for  
3 GUS activity measurement.

#### 4 **RNA isolation and real-time quantitative PCR:**

5 Total RNA was extracted from the leaves of control and treated cotton seedlings by a CTAB (cetyltriethyl  
6 ammonium bromide) extraction procedure as described by Chang et al. (1993). To avoid DNA contamination, the  
7 total RNA was treated with RNase free DNaseI (Epicentre biotechnologies, USA) by incubating at 37 °C for 15  
8 min. One µg of total RNA was used for synthesizing the first-strand cDNA using RevertAid 1<sup>st</sup> strand cDNA  
9 synthesis kit (Thermo Fischer Scientific, USA) following the manufacturer's instructions. An oligo(dT)<sub>18</sub> was used  
10 as the primer in the reverse transcription reaction. For the real-time quantitative PCR, cDNA was diluted to 100  
11 ng/µl and was mixed with the SYBR master mix (Kapa Biosystems, USA), and amplification was carried out  
12 according to the manufacturer's protocol in the StepOne Plus machine (Applied Biosystems, USA). The  
13 constitutively expressing Ubiquitin gene (*GhUBQ7*, GenBank accession no. DQ116441) from cotton, was used as an  
14 internal reference gene. The primer sequences used to amplify the internal regions of *GhNAC4* (NAC4-RTF and  
15 NAC4-RTR), and *GhUBQ7* (UBQ7-RTF and UBQ7-RTR, Kuppu et al. 2013) are mentioned in Table 1. To ensure  
16 the gene specificity, the amplicons obtained by these primers were sequenced and confirmed. The fold change in the  
17 *GhNAC4* gene levels relative to *GhUBQ7* gene was determined using the  $\Delta\Delta C_T$  method (Livak & Schmittgen 2001).  
18 The experiment was performed in triplicates, and two independent biological replicates were used.

19

#### 20 **Isolation and cloning of *GhNAC4* promoter from cotton:**

21 The full-length CDS of *GhNAC4* (GenBank accession number EU706342.1) was used as a query to retrieve the 5'  
22 upstream sequence from Phytozome (<https://phytozome.jgi.doe.gov/>). Genomic DNA was isolated from the leaves  
23 of cotton by the CTAB method (Murray & Thompson 1980). It was used as a template for PCR amplification of a  
24 DNA fragment, in the range of -1492 bp to +119 bp (relative to the transcription start site). The primer sequences  
25 (*GhNAC4*PRO-F, *GhNAC4*PRO-R) used for the amplification are mentioned in the Table 1. The amplicon was cloned  
26 into pTZ57R/T (ThermoFisher Scientific, USA) and the accuracy was verified by sequencing. The fragment was  
27 excised and sub-cloned into BamHI and PstI restriction sites of the promoter-less vector, pCAMBIA 1381Z  
28 (Cambia, Australia) to generate a fusion gene having 5' upstream region of *GhNAC4* and *uidA* gene  
29 (*pGhNAC4*Pro:GUS). This construct was used for *Agrobacterium tumefaciens* (strain EHA105) transformation by  
30 using the freeze-thaw method.

#### 31 **Generation of tobacco transgenics:**

32 *In vitro* grown three weeks old *Nicotiana tabacum* cv. Samsun leaves were used as explants, for transformation with  
33 *Agrobacterium* harboring either the empty pCAMBIA 1381Z (vector control) or the pPro<sub>*GhNAC4*</sub>:GUS vector,  
34 according to Horsch et al. (1985). Explants were co-cultivated with *Agrobacterium* on a co-cultivation medium (MS

1 salts with 2 mg/l BAP, 0.1 mg/l NAA and 3% sucrose pH 5.8) for 48 h in dark and later were transferred to the shoot  
2 induction medium (MS salts with 2 mg/l BAP, 0.1 mg/l NAA, 3% sucrose, 10 mg/l hygromycin and 250 mg/l  
3 Cefotaxime pH 5.8) with 16/8 h light/dark photoperiod at 24±2 °C. The regenerated shoots were sub-cultured on  
4 shoot elongation medium (MS salts with 1 mg/l BAP, 0.05 mg/l NAA, 3% sucrose, 15 mg/l hygromycin and 250  
5 mg/l Cefotaxime pH 5.8). The hygromycin resistant shoots were further sub-cultured on rooting medium (0.5xMS  
6 salts with 0.1 mg/l NAA and 20 mg/l hygromycin pH 5.8). Plants with well-developed roots were transferred to  
7 sterile soil in small plastic cups for acclimatization.

8 Further, well-established plants were shifted to pots and allowed to grow to maturity in green house and set seeds.  
9 The putative primary transformants (T<sub>0</sub>) were screened by genomic PCR for the presence of *GhNAC4* promoter  
10 sequence and hygromycin gene (*HptII*) (with primers, HptII-F and HptII-R) and allowed to self-pollinate and set  
11 seeds. The T<sub>1</sub> seeds from selected plants were germinated on 0.5X MS medium supplemented with 25 mg/l  
12 hygromycin. Copy number of the DNA integration was determined by Hyg<sup>R</sup> segregation test. Segregation analysis  
13 was carried out by counting the number of green and bleached seedlings. The hygromycin-resistant (green)  
14 seedlings were later transferred to soil in the green house after 2-3 weeks and allowed to set seeds. The T<sub>2</sub> progeny  
15 were germinated on 0.5X MS medium supplemented with 25 mg/l hygromycin to identify the homozygous T<sub>2</sub> lines.

#### 16 **Histochemical localization and fluorometric measurement of GUS activity:**

17 β-glucuronidase (GUS) activity was assayed as described by Jefferson et al. (1989) with minor modifications. For  
18 histochemical staining, the tissues were vacuum infiltrated with the solution containing 1 mM X-Gluc (5-bromo-4-  
19 chloro-3-indolyl-b-D-glucuronide), 1 mM potassium ferrocyanide, 1 mM potassium ferricyanide, 1 mM EDTA and  
20 0.1% Triton X-100 in 50 mM phosphate buffer (pH 7.0) and were incubated at 37 °C for 12-14 h in the dark. After  
21 staining, the tissues were fixed in a solution containing 4% formaldehyde in 50 mM phosphate buffer (pH 7.0) for  
22 12 h at 4 °C and subsequently cleared in 70% ethanol at room temperature. Photographs were taken using M165 FC  
23 and DM6B microscopes (Leica Microsystems, Germany).

24 For the fluorometric assay, the tissue was homogenized in 400 μl GUS extraction buffer containing 10 mM  
25 EDTA and 0.1% Triton X-100 in 50 mM phosphate buffer (pH 7.0). After centrifugation at 12,000 rpm (4 °C) for 15  
26 min, 5 μl of homogenate was diluted with 95 μl of extraction buffer and mixed with 100 μl of extraction buffer  
27 having 2 mM 4-methyl-umbelliferyl-β-D-glucuronide (4-MUG, Duchefa, Netherlands) and incubated at 37 °C for 1  
28 h. The reaction was terminated by the addition of 1.8 ml of 200 mM sodium carbonate. Total protein concentration  
29 in the homogenate was assessed by Bradford method (Bradford, 1976) with BSA as standard. Fluorescence  
30 (excitation 363 nm, emission 447 nm) was determined by Infinite 200 plate reader (Tecan, Switzerland) and GUS  
31 activity was expressed as pmol 4-methyl-umbelliferone (4-MU, Sigma, USA) per μg protein per min. 4-MU in the  
32 range of 20 nM-100 μM was used to generate a standard curve. Each MUG assay was performed in triplicate and  
33 repeated three times. The data shown represent mean (n = 3) ± standard error of the mean.

#### 34 **Bioinformatics analysis of *GhNAC4* promoter sequence:**

1 A search for the putative *cis*-acting regulatory elements in the promoter sequence was conducted using the  
2 PlantPAN 2.0 (Chang et al. 2008, <http://plantpan2.itps.ncku.edu.tw/>), PLACE (Higo et al.  
3 1999, <http://www.dna.affrc.go.jp/htdocs/PLACE/>) and PlantCARE (Lescot et al. 2002,  
4 <http://bioinformatics.psb.ugent.be/webtools/plantcare/html/>) databases.

### 5 **Statistical analysis:**

6 All experiments were repeated at least three times and the data were expressed as the mean  $\pm$  SD. Error bars shown  
7 are the standard deviation of the experimental data. Data was analyzed by one-way analysis of variance (ANOVA)  
8 using SigmaPlot 11.0 software. \*\*\*  $P < 0.001$ , \*\*  $P < 0.01$  and \*  $P < 0.05$  represents significant differences at  
9 0.1, 1 and 5% level respectively. 'ns' represents no significant difference.

### 10 **Results:**

#### 11 **Expression analysis revealed the responsiveness of *GhNAC4* gene to various phytohormones and** 12 **environmental stresses:**

13 Plant stress responses are thought to be regulated by various hormones and multiple signaling pathways. They show  
14 significant overlap with the gene expression patterns (Singh et al. 2002). To gain an insight into the impact of  
15 environmental stresses and phytohormones on gene expression of *GhNAC4*, qRT-PCR analysis was carried out by  
16 subjecting cotton seedlings to various treatments (see materials and methods). Fig. 1 shows that *GhNAC4* responded  
17 differentially to several phytohormones. Phytohormones like BAP, ABA, GA3, and MeJA significantly upregulated  
18 the expression of *GhNAC4*. BAP caused induction of expression by 10.4 fold, GA3 by 11.5 fold, ABA by 6.9 fold  
19 and MeJA by 7.8 fold at 24 h. However, other hormones such as IAA, Ethylene and SA caused weak upregulation  
20 of its expression (4-5 fold) at 24 h.

21 PEG-induced drought treatment resulted in very high upregulation of *GhNAC4* expression (~184 fold) at 24 h. Other  
22 abiotic stress treatments like high salinity and osmotic stress (caused by mannitol) also lead to high upregulation of  
23 expression (43.6 and 58.7 fold respectively). Air-drying caused 10.2 fold, cold by 19.4 and MV by 14.5 fold  
24 upregulation in the *GhNAC4* transcripts. However, *GhNAC4* was weakly upregulated by high temperatures,  
25 flooding, wounding and dark treatments (2-6 fold) compared to other treatments as shown in Fig. 2.

#### 26 **Sequence analysis of *GhNAC4* promoter:**

27 A total of 1612 bp (-1492 bp to +119 bp) was amplified from *G. hirsutum* (Var. JK Durga) and was sequenced.  
28 Sequence similarity of 91.6% (LALIGN, <https://www.ebi.ac.uk/Tools/psa/lalign/>) was observed between the  
29 promoter region of *G. raimondii* and *G. hirsutum* of *NAC4* gene. No significant difference was observed between  
30 the predicted motifs in the two sequences. The composition of GC content of *GhNAC4* promoter was 29.9%  
31 (BioEdit, Hall 1999) which is in accordance with the observed range (Joshi 1987) for a plant promoter. The putative

1 transcription start site (TSS) predicted by Softberry database ([www.softberry.com](http://www.softberry.com)) using the default settings, was  
2 located 119 bp upstream of the ATG translation start codon, which was consistent with the features of a eukaryotic  
3 promoter as shown in Fig. 3. The predicted TATA box was located 16 bp upstream of TSS, and a CAAT box was  
4 located 179 bp upstream of TATA box. Several other CAAT boxes were also predicted in the entire length of the  
5 sequence.

#### 6 **Multiple hormone-related, environmental stress-related and tissue-specific *cis*-elements were** 7 **predicted on the *GhNAC4* promoter:**

8 Putative *cis*-acting regulatory elements and their location were searched using the PlantPAN 2.0, PlantCare and  
9 PLACE software tools. Only statistically significant motifs (P value >0.9) were selected. The resulting putative *cis*-  
10 acting regulatory elements were grouped into six classes, as shown in Table 2, including phytohormone-responsive  
11 motifs, stress-responsive motifs, light responsive, basic transcription elements, tissue-specific elements, and other  
12 TF binding sites. We observed a relatively high proportion of tissue-specific motifs and transcription factors binding  
13 sites followed by light specific, hormone responsive and stress responsive elements (Fig. 4).

14 Several motifs responding to phytohormones were revealed in the *GhNAC4* promoter. Various ABA-responsive  
15 elements such as ABRELATERD1, ACGTABREMOTIFA2OSEM, and ABRERATCAL (found upstream of  $Ca^{+2}$   
16 responsive genes) were observed in the promoter sequence. Auxin-responsive motifs such as one AUXREPSIAA4,  
17 one TGA element, one GGTCCCATGMSAUR, and two CATATGGMSAUR motifs, were predicted. Salicylic acid  
18 responsive motifs like TCA element and WBOXATNPR1 (recognition site of SA-induced WRKY TFs) were also  
19 identified. TGACG and CGTCA motifs, required for jasmonic acid induction were found in the sequence.  
20 Gibberellins responsive elements such as GARE1OSREP1, GAREAT, and GADOWNAT were found. ARR1AT  
21 TF, a cytokinin response regulator, and CPBCSPOR motif, critical for cytokinin enhanced expression were also  
22 observed. The *cis*-elements known to play a role in ethylene induction such as ERELEE4 and binding sites of  
23 EIN/EIL TF, a positive regulator in the ethylene response pathway were also identified in the promoter sequence.  
24 Binding sites of BES1 TF, key TFs in the Brassinosteroids signaling pathway were also observed in the putative  
25 promoter sequence. Furthermore, several recognition sites of AP2/ERF TFs were also found in the sequence, which  
26 are key regulators in integrating various hormone signals and play a role in stress response.

27 A scan of the motifs showed that some potential elements, such as the MYB recognition sites like MYB1AT and  
28 MYB2CONSENSUSAT, that are stress-induced regulatory motifs found in the promoters of the dehydration-  
29 responsive gene were identified. *Cis*-elements such as DRECRTCORE, HSE, CBFHV, and a binding site for CSD  
30 and HSF TFs, known to regulate responses to cold shock and heat stress were predicted. The binding site for bZIP  
31 (ACGTTBOX), WRKY (WBOXPCWRKY1) and MYB (MYB1LEPR) TFs that were known to play important  
32 roles in stress response were found. *GhNAC4* promoter sequence also contained a *cis*-element for nutrient deficiency  
33 response like the GMHDLGMVSPB, which is a binding site of homeodomain-leucine zipper protein, which is found  
34 in the phosphate response domain. Various motifs and target sites of TFs, vital for biotic stress response were also  
35 predicted in the promoter sequence. Many fungal elicitor response elements like BOXLCOREDCPAL, TC- RICH

1 REPEATS, and GT1GMSCAM4 were observed. Numerous binding sites of BELL homeodomain TF, BIHD1OS,  
2 known to play a vital role in disease response were also observed in the sequence. Hypersensitive response element  
3 like HSRENTHSR203J was also observed. Motifs involved in wounding response such as T/GBOXATPIN2 and  
4 WBOXNTERF3 were also found. ANAERO1CONSENSUS, a motif found upstream of anaerobic induced genes  
5 was observed.

6 *cis*-Elements involved in sugar repression like PYRIMIDINEBOXOSRAMY1A, UP2ATMSD and WBOXHVIS01  
7 (SUSIBA2 binds to W-box element) TFs were identified; they are also known to plays a role in auxiliary bud  
8 outgrowth after stem decapitation.

9 Several motifs essential for light-regulated transcriptional activation like SORLIP2AT, IBOXCORE,  
10 GT1CONSENSUS (that activate and stabilize the transcription machinery), GATA (that also plays a role in  
11 vascular-specific expression), and CGACGOSAMY3 (G Box/BOXII) were identified in the putative promoter  
12 sequence suggesting that *GhNAC4* might be highly regulated by light. Motifs important for plastid-specific  
13 expression such as BOXIINTPATPB, -10PEHVPSBD, and PRECONSCRHSP70A were also present in the  
14 *GhNAC4* promoter.

15 The specific expression is crucial for genes functioning at particular stages and in a particular tissue(s). A plethora of  
16 motifs essential for tissue-specific expression was predicted in the *GhNAC4* promoter sequence. Motifs important  
17 for embryo maturation and seed development such as SEF4MOTIFGM7S, SEF1MOTIF, and CANBNNAPA were  
18 found. Binding sites for TALE TFs, that are known to play to a role in meristem function and involved in  
19 maintaining cells in an undifferentiated state, were also observed. Motifs involved in root specific expression like  
20 OSE2ROOTNODULE, ROOTMOTIFTAPOX and recognition sites for MYBST1 were identified. Several copies of  
21 CACTFTPPCA1, which is an important motif for mesophyll expression, were found. Numerous binding sites of  
22 DOFCOREZM involved in regulation of carbon metabolism and for shoot and leaf-specific expression were  
23 identified. Binding sites of WOX TF, known to be involved in several key developmental processes was also  
24 observed. TAAAGSTKST1, a motif known to play a role in controlling guard cell-specific gene expression, was  
25 also found. Numerous binding sites for TFs significant for vascular-specific expression like DOF, GATA, and AT  
26 hook TFs were observed. Many target sites for TCR, SBP and MYBPZMTFs and motifs like CARGCW8GAT and  
27 TGTCACACMCUCUMISIN significant for flower and fruit development were present. Motifs for pollen specific  
28 expression such as POLLEN1LELAT52 and GTGANTG10 were also identified.

29 *cis*-Elements involved in gene expression induction in actively dividing cells such as MYBCOREATCYCB1,  
30 E2FCONSENSUS and CELLCYCLESC were predicted in the sequence. Motifs such as MARARS, MARABOX1,  
31 and MARTBOX are known to play a role in scaffold attachment region were also found.

32 Several potential binding sites for transcription factors, such as NAC, MYB/SANT, ZF-HD, bHLH, Storekeeper,  
33 bZIP, GRAS, and TCP were also identified.

1 Basal motifs, playing a critical role in the core transcription initiation, were found in the promoter of *GhNAC4*.  
2 Several TATA box motifs, essential for accurate initiation of transcription and synergistic enhancement of  
3 transcription were found. CAAT-box motifs that are universal enhancer elements in promoters were also predicted.  
4 In addition to basal regulatory elements, a number of transcriptional regulatory elements were found. Several  
5 enhancer elements, for example, CTRMCAMV35S, QARBNEXTA, QELEMENTZM3M13, and 5' UTR -  
6 PYRIMIDINE STRETCH and binding sites of NF-Y TF were identified. Interestingly, a repressor element like  
7 RE1ASPHYA3 was also found in the promoter. These elements suggest that *GhNAC4* promoter is functional *in situ*.  
8 The presence of these motifs hints that regulation of *GhNAC4* gene expression is complex and it may play a possible  
9 role during plant growth and is responsive to phytohormones, environmental stresses, and light.

#### 10 **Generation and analysis of tobacco transgenics of PRO<sub>GhNAC4</sub>:GUS:**

11 To evaluate the promoter activity of *GhNAC4* gene, 1612bp fragment was amplified by PCR and was  
12 cloned into pTZ57R/T vector for confirmation. The promoter sequence was then cloned into a binary  
13 vector, pCAMBIA1381Z for fusing it to *GUS* reporter gene in a transcriptional fusion. Transgenic  
14 tobacco plants carrying the PRO<sub>GhNAC4</sub>:GUS were generated using the Agrobacterium-mediated leaf disc  
15 transformation method. A total of 12 hygromycin resistant T<sub>0</sub> plants were generated and were confirmed  
16 by genomic PCR. Out of these, 11 plants exhibited the expected band sizes of 1612 bp and 1026 bp  
17 corresponding to the size of *GhNAC4* promoter sequence and *HptII* gene, respectively. To eliminate the  
18 effect of gene copy number on GUS activity, only single copy T<sub>1</sub> progenies, P7, P9, and P17 were used  
19 for further generation of T<sub>2</sub> seeds. The homozygosity of T<sub>2</sub> lines was confirmed by uniform 100%  
20 germination on a medium supplemented with hygromycin. The T<sub>2</sub> progenies of three lines, P7.1, P9.5,  
21 and P17.3, were used for tissue specific localization and MUG assay.

#### 22 **GhNAC4 localizes to various tissues during growth and development:**

23 As several motifs pertaining to tissue localization were observed in the promoter sequence, we used GUS  
24 histochemical assay to precisely define the spatial-temporal expression patterns of *GhNAC4* promoter throughout  
25 plant development in T<sub>2</sub> generation transgenics tobacco plants. Fig. 5 shows the localization of *GhNAC4* gene from  
26 vegetative to reproductive tissues in tobacco.

27 In the early stages of Tobacco growth (1 d old seedlings), GUS activity was first observed in the emerging radical  
28 (Fig. 5a) and later, it was detected in emerging cotyledons, root tip and shoot apex of 3 d old seedlings, but the GUS  
29 activity was relatively weaker in hypocotyl tissues (Fig. 5b). In the 7, and 15 d old PRO<sub>GhNAC4</sub>:GUS transformed  
30 tobacco seedling, GUS expression was detected in the leaf veins, petioles, stem and root (Fig. 5c-d). Similar GUS  
31 activities were maintained in the one month old seedling (Fig. 5e). The main and the lateral roots showed GUS  
32 expression, which was absent in the root cap region and the root hairs (Fig. 5f-g). Intense GUS activity was also  
33 observed in the mid rib and the lateral veins, but the leaf lamina showed little staining (Fig. 5h). We also observed



1 the GUS activity in the guard cells (Fig. 5i) and the developing mid rib regions of a young leaf (Fig. 5j). Fig. 5k-m  
2 shows the staining of the floral structures, which revealed that the GUS activity was present in the sepals, anthers,  
3 pollen grains, and stigma and to a lesser extent in the petal edges. However, it was absent in the ovary and pedicel.  
4 No expression was detected in the seedlings harboring a promoter-less *GUS* gene regardless of the developmental  
5 stage (Fig. 5n). This strongly indicates that *GhNAC4* expression is under developmental and temporal control and its  
6 promoter modulates a precise transcriptional regulation throughout the plant growth and development process  
7 consistent with the bioinformatics data.

#### 8 ***GhNAC4* localizes to vascular bundles and is wound-inducible:**

9 To obtain a better understanding of tissue specificity of GUS activity, thin cross-sections of various tissues using a  
10 razor blade were made. GUS staining was only detected in the vascular bundles, especially in the phloem of leaf  
11 veins, petiole, stem, and root (Fig. 6a-e). Other cell types, like the pith, cortex, and epidermis remained unstained.  
12 However, upon wounding, cortex, and epidermis also showed intense GUS expression (Fig. 5k and 6f).

#### 13 ***GhNAC4* promoter is induced by various phytohormones in transgenic tobacco seedlings:**

14 To explore the possible regulation of *GhNAC4* gene expression by phytohormones, the activity of GUS was  
15 examined by fluorometric MUG assay, and treating the PRO<sub>*GhNAC4*</sub>:GUS T<sub>2</sub> transgenic tobacco seedlings with  
16 various hormones. The corresponding results have been depicted in Fig. 7. The specific activity of GUS enzyme  
17 without any hormone treatments in *GhNAC4* seedlings was measured to be  $2.42 \pm 0.42 \text{ pmol } \mu\text{g}^{-1} \text{ min}^{-1}$ . This is in  
18 agreement with the histochemical staining results, where GUS staining was observed even in untreated seedlings.  
19 When 2-week old tobacco seedlings were treated with different hormones for 24 h, the highest level of induction  
20 was seen upon BAP treatment (~3.1 fold) and followed by ABA (~2.7 fold). GUS activities were also moderately  
21 enhanced by IAA (~2.4 fold) and MeJA (~2.2 fold). The promoter weakly responded to GA3 (~2.1 fold) and  
22 Ethylene (~1.8 fold) but not to SA as compared with the untreated control samples. This suggests that *GhNAC4* gene  
23 expression is regulated largely by multiple phytohormones. This data is consistent with the pattern and presence of  
24 *cis*-acting elements observed in the promoter sequence.

#### 25 ***GhNAC4* promoter is responsive to various environmental stress treatments:**

26 Since we have observed that *GhNAC4* gene expression was regulated by various stresses, we studied the promoter  
27 activity in tobacco transgenics plants harboring the PRO<sub>*GhNAC4*</sub>:GUS construct by treating them with various  
28 environmental stresses for varying time points. This study was encouraged by the presence of several stress-  
29 responsive motifs in the promoter sequence, and the GUS activity was measured by the fluorometric MUG assay.  
30 An approximately three-fold increase in GUS activity was observed when the seedlings were subjected to salt,  
31 mannitol, PEG, MV, and air-drying as compared to untreated seedlings. A combination of cold and dark treatment  
32 also activated the promoter (~2.4 fold) as compared to dark alone (~1.7 fold). Flooding stress caused by submerging  
33 the seedlings in water moderately induced the promoter (~1.9 fold). High temperatures and wounding weakly  
34 activated the promoter (~1.7 fold) as shown in Fig. 8.



1 There are some differences in the expression levels among experimental systems such as cotton seedlings and  
2 tobacco transgenics, suggesting the presence of complicated factors in experiments in terms of treatments. The  
3 differences among the experimental systems remained to be determined.

#### 4 **Discussion:**

5 Transcriptional control is essential for mediating the responses of an organism to environmental cues. The promoter  
6 of a gene is critical in determining its spatial and temporal expression in the plant and during its development (Singh  
7 1998). The promoter sequence specifies the recruitment of TFs, which regulate its gene expression. The short *cis*-  
8 acting elements that specify the binding for the TFs are the vital functional components of promoter function.  
9 Therefore, investigations into the *cis*-acting elements and their interactions would aid in the understanding of the  
10 mechanism of transcriptional regulation (Hudson & Quail 2003).

11 To identify the putative *cis*-regulatory elements, a motif search was carried out for the promoter sequence of  
12 *GhNAC4*. We found that *GhNAC4* promoter region contained several *cis*-acting elements linked to various stress  
13 responses, phytohormone induction, tissue-specific localization, sugar response, light response, and transcriptional  
14 activation.

15 To precisely evaluate the function of *GhNAC4*, we generated transgenic tobacco plants having the PRO<sub>*GhNAC4*</sub>:GUS  
16 construct and analyzed the spatial, temporal, and developmental expression of GUS. We also studied the expression  
17 under various external phytohormones and environmental stress treatments.

18 Understanding how hormones and genes interact in a changing environment to synchronize plant growth and  
19 development is an important breakthrough in plant developmental biology. In a stressed condition, phytohormones  
20 can exhibit either synergistic or antagonistic interactions to modulate plant growth (Robert-Seilanian et al. 2011).  
21 Several phytohormones highly induced the expression of *GhNAC4* such as GA3, BAP, ABA, and MeJA by 7-11  
22 folds. Other hormones such as ethylene, SA and IAA lead to moderate increase in expression levels (4-5 fold).  
23 *GhNAC4* promoter region contains several key motifs linked to be involved in hormone responses.

24 ABA is an important stress hormone that plays crucial roles in plant adaptation to different stress conditions like  
25 osmotic imbalance, salinity, and drought. ABA regulates the expression of many genes that have functions in abiotic  
26 stress tolerance (Fujita et al. 2011). *GhNAC4* shows several folds induction by ABA (Fig. 1 & 7) and its promoter  
27 carried several motifs known for ABA responsiveness such as six ACGTABREMOTIFA2OSEM, eight  
28 ABRELATERD1, and one ABREOSRAB21 motif. ACGTABREMOTIFA2OSEM is an ABA-responsive motif  
29 found in the promoter of rice *OsEm* gene, which is, regulated by the seed-specific VP1 TF (Hattori et al. 2002). The  
30 ABRELATERD1 motif is related to the ABRE motif, and has been found upstream of Early Response to  
31 Dehydration1 (*ERD1*) gene, and is responsive to ABA and showing significant upregulation under water stress  
32 (Simpson et al. 2003). A single copy of ABRE is insufficient for ABA-responsive transcription. Either multiple  
33 copies of ABRE motif or ABRE along with a coupling element, forming the active ABA Response Complex  
34 (ABRC) are essential for ABA-induced gene expression (Skriver et al. 1991). *GhNAC4* promoter was predicted to

1 have one *CE3* coupling element. The minimal ABRC of the *HVA1* promoter from barley contained one coupling  
2 element and along with one ABRE motif, which were enough to confer high levels of ABA induction when linked  
3 to a minimal promoter (Shen et al. 1996).

4 Regulation of gene expression by cellular calcium plays a crucial role in plant responses to environmental stresses.  
5 The stress stimuli trigger a burst of cytosolic calcium ions which confers changes in gene expression, thereby  
6 allowing plants to adapt to the stress conditions (Knight 2000). The ABRERATCAL motif is a sequence related to  
7 ABRE, found upstream of calcium ion responsive genes. Quite a few genes upregulated by calcium ion having  
8 ABRERATCAL motifs were early stress-induced genes (Kaplan et al. 2006). The *GhNAC4* promoter region was  
9 predicted to have seven ABRERATCAL motifs suggesting that it may also be responsive to calcium and ABA-  
10 mediated stress adaptation.

11 Gibberellins (GA) are essential for many plant developmental processes such as seed germination, plant growth, and  
12 flower development (Richards et al. 2001). GA and ABA are known to mediate several plant developmental  
13 processes antagonistically, but recent data suggests the involvement of GA in plant adaptation to stress (Colebrook  
14 et al. 2014). *GhNAC4* was highly upregulated by GA<sub>3</sub> (Fig. 1 & 7) and its promoter has four copies GAREAT and  
15 two copies of GARE1OSREP1 motifs, which are gibberellins responsive elements (Skriver et al. 1991). An R2R3-  
16 type MYB TF called the GAMYB directly interacts with the GARE motif in the promoter of barley amylase gene  
17 and seemed to be essential for the GA induced gene expression (Gubler et al. 1995). Recent evidence indicates that  
18 GAMYB is also a target of the antagonistic effects of ABA signaling (Gomez-Cadenas et al. 2001; Zentella et al.  
19 2002). Multiple copies of GARE alone or in association with other motifs such as PYRIMIDINE box or TATCCAC  
20 box (forming the Gibberellins Response Complex), are essential for GA induced gene expression at higher levels  
21 (Lanahan et al. 1992; Rogers et al. 1994). *GhNAC4* promoter region also exhibits four copies of  
22 PYRIMIDINEBOXOSRAMY1A motif. A DOF TF (OsDOF3) binds to the pyrimidine box in the promoter region  
23 of rice *RAMY1a* gene that is one of the most predominant GA-responsive genes (Washio 2001). GAMYB and  
24 OsDOF3 are shown to interact with each other and synergistically cause the GA induction of gene expression  
25 (Washio 2003). GAs are main targets for stress-induced growth modulation, and recent evidence indicates the  
26 involvement of GA in either promotion or suppression of growth depending on the type of stress (Colebrook et al.  
27 2014). GADOWNAT motif is a common sequence found in the genes down-regulated by GA. Interestingly, this  
28 motif is identical to ABRE (Ogawa et al. 2003). Five copies of this motif are present in the *GhNAC4* promoter  
29 suggesting coordinated regulation of *GhNAC4* by GA and ABA.

30 Ethylene is essential for plant growth and development and plays a crucial role in responses to environmental stress  
31 such as pathogen attack, wounding, flooding, high temperatures, and drought (Abiri et al. 2017). *GhNAC4* promoter  
32 contained four binding sites for ethylene insensitive (EIN) TF, and the ethylene treatment upregulated the transcript  
33 levels of *GhNAC4* (Fig. 1 & 7). AtNAC2 TF upregulation under salinity treatment was induced in ethylene-  
34 overproducing mutant *eto1-1* but was repressed in ethylene-insensitive mutants *etr1-1* and *ein2-1* (He et al. 2005)  
35 suggesting that ethylene plays a positive role in the salt response of AtNAC2 TF. Most of the ethylene responses  
36 appear to be mediated by EIN3 TF along with ethylene insensitive-like (EIL) protein (Solano et al. 1998). EIN3 TF

1 was shown to enhance salt tolerance in Arabidopsis (Peng et al. 2014) and also act synergistically with SOS2 to  
2 modulate salt stress response (Quan et al. 2017). Furthermore, EIN3/EIL1 act as a node integrating ethylene and JA  
3 signaling for regulating plant growth and stress responses (Zhu et al. 2011).

4 Cytokinin regulates many important aspects of plant growth and development such as development of vasculature,  
5 photomorphogenesis, and stress responses (Werner & Schmülling 2009). We have observed high upregulation of  
6 *GhNAC4* transcripts in cytokinin (BAP) treatment (Fig. 1 & 7), and the promoter region of this gene was predicted  
7 to have one CPBCSPOR motif and 16 binding sites for Authentic Response Regulators1 (ARR1). ARR1 is an  
8 important signaling component, acting at the head of transcriptional cascade to regulate cytokinin response and is  
9 known to be involved in cytokinin-mediated differentiation of protoxylem (Yokoyama et al. 2007). They are also  
10 known to regulate plant responses to abiotic stresses (Nguyen et al. 2016; Jeon & Kim 2013).

11 Auxin is a phytohormone that plays a crucial role in growth and development. It regulates the development of  
12 primary and lateral roots and has a most profound role in vascular differentiation and venation pattern formation  
13 (Zhao 2010). Auxin (IAA) was shown to induce the expression of *GhNAC4* (Fig. 1 & 7), and the promoter region  
14 shows an AUXREPSIAA4, one TGA element, one GGTCCCATGMSAUR, and two CATATGGMSAUR motifs.  
15 AUXREPSIAA4 is an auxin-responsive element (AUXRE) found upstream of pea *IAA4* gene, which is an early  
16 auxin-inducible gene (Ballas et al. 1993). GGTCCCATGMSAUR and CATATGGMSAUR are AUXREs found in  
17 the promoter region of maize *SAUR* (Small Auxin-Up RNA) gene (Li et al. 1994; Xu et al. 1997). Each of these  
18 promoters is rapidly (within few minutes) and specifically induced by auxin. Auxin Response Factors (ARFs) bind  
19 to AUXRE and mediate hormone response. ARF5 is required for the formation of vascular strands at all stages and  
20 critically required for embryonic root formation (Hardtke & Berleth 1998). Auxin role in stress response is emerging  
21 and Bouzroud et al. (2018) suggested that ARFs are potential mediators of auxin action to environmental stresses.  
22 Vascular bundle localization of GUS in PRO<sub>*GhNAC4*</sub>:GUS transgenic plants (Fig. 6) could be attributed to the  
23 regulation of *GhNAC4* promoter by auxin and cytokinin.

24 Jasmonates are important regulators of plant defense responses to pathogen and insect attack, herbivory and  
25 wounding (Wasternack 2007). MeJA and wounding induced the expression of *GhNAC4* by several folds (Fig. 1 & 2)  
26 and its promoter contains motifs such as T/GBOXATPIN2, TGACG, and CGTCA. JAMYC/AtMYC2 TF binds to  
27 the T/GBOXATPIN2 motif, found in the promoter of JA responsive and wound-inducible Protease Inhibitor II  
28 (*PIN2*) gene. JAMYC act as a conserved master switches regulating the expression of several JA-regulated defense  
29 genes especially during wounding response (Lorenzo et al. 2004; Boter et al. 2004). A bZIP TF, TGA1, is a positive  
30 regulator of disease resistance, and binds to the TGACG motif and its palindrome CGTCA motif which is known for  
31 JA responsiveness (Schindler et al. 1992; Shearer et al. 2012). TGACG motif is found in promoters of various JA  
32 responsive genes like *OsOPRI* known to play important roles in defense responses in rice (Sobajima et al. 2007).

33 Phytohormones act synergistically and antagonistically with each other to regulate plant growth and development in  
34 association with a changing environment by forming a complex cross-talks network (Robert-Seilaniantz et al. 2011).  
35 One of the TF families modulating these multiple regulatory responses is Apetala2/ Ethylene responsive factor

1 (AP2/ERF) TFs (Licausi et al. 2013). Apart from ethylene, JA, ABA, auxin, and cytokinin also regulate many  
2 members of the AP2/ERF TF family. AP2/ERF TFs also modulate the content of these phytohormones by regulating  
3 their biosynthesis pathways. The stimulated TFs would further regulate the downstream target genes resulting in  
4 changes in plant growth and development, environmental stress responses (Gu et al. 2017). They mediate  
5 downstream responses by binding to GCC box (ethylene response element) and/or DREB element (Fujimoto et al.  
6 2000). *GhNAC4* promoter has four copies of GCC box motif. Taken together, this suggests that *GhNAC4* may act  
7 downstream of AP2/ERF TF.

8 As *GhNAC4* expression is regulated by many phytohormones essential for stress response and plant development  
9 and the promoter contains several motifs required for regulation by phytohormones, our data suggest that *GhNAC4*  
10 TF can act as a node modulating hormonal response in a changing environment to regulate plant development.

11 Plants being sessile have developed capabilities to grow and propagate even under extreme environmental  
12 conditions such as high salt, severe drought, heavy metal stress, low or high temperatures. Plants have become  
13 specialized in rapidly sensing and responding to adverse environmental conditions by having a complex network of  
14 cellular processes for stress adaptation (Wang et al. 2003). Various genes induced during stress response not only  
15 play a role in stress tolerance but also play a role in sensing and transcriptional regulation (Zhu 2016). *GhNAC4* was  
16 highly upregulated by drought (~184 fold), salinity (~43 fold), osmotic stress (~58 fold) caused by mannitol,  
17 oxidative stress (~14 fold) induced by methyl viologen, cold (~19 fold), high temperature stresses (~6 fold), and  
18 wounding (~5 fold) (Fig. 2). Binding sites for various TF such as MYB, CSD, HSF, WRKY, BELL, and C2H2,  
19 known to be involved in environmental stress responses were observed in the *GhNAC4* promoter region.

20 Low-temperature stress and drought are two major limiting physiological factors affecting plant growth,  
21 productivity, and geographical distribution (Shinozaki & Yamaguchi-Shinozaki 2000). *GhNAC4* is significantly  
22 upregulated by cold stress and drought (Fig. 2 & 8), and its promoter region carries many motifs required for  
23 drought and cold responsiveness like MYB2CONSENSUSAT, C-REPEAT/DRE, DRECRTCOREAT, CSD, and  
24 CBFHV TF binding sites. Two copies of MYB2CONSENSUSAT motifs are found in the *GhNAC4* promoter, which  
25 is the binding site of AtMYB2 TF, that is required for drought inducibility of *rd22* gene by binding to its promoter  
26 region (Abe 2003). Cold responsive motif, C-repeat (CRT) motif is responsible for the regulation of many cold-  
27 inducible genes in an ABA-independent manner. It is also involved in dehydration responsiveness (Stockinger et al.  
28 1997). An AP2 domain-containing TF, CBF/DREB binds to this motif. Three copies of the DRECRTCORE motif  
29 are found in the *GhNAC4* promoter. CBFHV motif is a binding site of an AP2 domain containing cold-inducible TF,  
30 HvCBF1 characterized in barley (Xue 2002). Three copies of CBFHV motif are found in the *GhNAC4* promoter.  
31 Eight copies of binding sites for cold shock domain (CSD) proteins are also found in the *GhNAC4* promoter and are  
32 highly upregulated during low-temperature stress. Apart from being important during cold adaptation, they are also  
33 known to play a role in plant development (Chaikam & Karlson 2008).

34 Heat stress damages components of the photosynthetic apparatus and leads to oxidative stress and thereby affecting  
35 plant growth and productivity (Kotak et al. 2007). High temperature and oxidative stress highly induced *GhNAC4*

1 transcripts (Fig. 2 & 8). Heat stress proteins (HSP) are molecular chaperones essential for restoration of homeostasis  
2 during heat stress, and the transcriptional regulation of HSPs are controlled by heat stress transcription factors (HSF)  
3 (Al-Wahaibi 2011). They bind to the heat stress responsive element (HSE) and modulate transcription (Baniwal et al.  
4 2004). Four copies of HSF binding sites were present in the *GhNAC4* promoter. Binding sites for C2H2 TF were  
5 also identified in the *GhNAC4* promoter region. C2H2 TFs such as ZAT7, ZAT10, and ZPT2 are known to be  
6 important in regulating responses to abiotic and biotic stress tolerance (Kielbowicz-Matuk 2012).

7 Plants defend themselves against pathogen attacks by developing strong physical barriers in their cell walls and a  
8 complex signaling network that involves inducible defense mechanisms. *GhNAC4* promoter contains several binding  
9 sites of TFs like WRKY, MYB, BELL and also many copies of motifs such as WBOXNTCHN48,  
10 BOXLCROREDCPAL, HSR203J, and GT1GMSCAM4 known to be essential for elicitor-induced  
11 activation of defense genes.

12 Elicitor inducible WRKY TF is involved in transcription of defense genes like chalcone synthase (*CHN48*) in  
13 tobacco by binding to the WBOXNTCHN48 motif (Yamamoto et al. 2004). DcMYB1 TF binds to the  
14 BOXLCROREDCPAL motif in the promoter of carrot phenylalanine ammonia-lyase (*PAL*) gene and is essential for  
15 induction by elicitor treatment or UV-B irradiation (Maeda et al. 2005). *HSR203J* gene is rapidly and specifically  
16 upregulated during a hypersensitive response and HSR203J (HSR203 responsive element) motif is  
17 responsible for the induction of HSR203J during incompatible plant-pathogen interactions (Pontier et al. 2001).  
18 Soybean calmodulin (SCaM-4) is rapidly induced by pathogen attack and salt stress. This is mediated by the binding  
19 of GT-1 TF to the promoter at the GT1GMSCAM4 motif (Park et al. 2004). Six such motifs are also present in the  
20 *GhNAC4* promoter. OsBIHD1 TF is a BELL homeodomain TF known to induce resistance in rice in response to  
21 *Magnaporthe grisea* (Luo et al. 2005). Six copies of OsBIHD1 binding sites were found in the *GhNAC4* promoter.  
22 Mechanical wounding induced the expression of *GhNAC4* by several folds (Fig. 2 & 8) and we observed intense  
23 GUS staining in the wounded area (Fig. 6). *GhNAC4* promoter consists of four copies of WBOXNTERF3 motifs.  
24 WRKY TF binds to the WBOXNTERF3 motif in the promoter of *ERF3* gene of tobacco and upon wounding causes  
25 rapid activation (Nishiuchi et al., 2004). Thus, these motifs may modulate the expression of *GhNAC4* gene in  
26 response to various abiotic and biotic stress.

27 Presence of ABA-dependent and independent abiotic stress-related motifs and also elicitor-induced motifs in the  
28 *GhNAC4* promoter, suggests that there is a cross-talk between various stress signaling pathways and *GhNAC4* may  
29 act as a node for the integration of these pathways. This maybe modulated by the interactions of different motifs  
30 present in the *GhNAC4* promoter.

31 Stress responses occur primarily at the level of transcription, leading to the regulation of spatial and temporal  
32 expression of stress-induced genes (Geng et al. 2013). Spatial and temporal patterns under the control of *GhNAC4*  
33 promoter were monitored in various tissues by the detection of GUS activity in transgenic tobacco plants. In the  
34 present investigation, we have observed the expression of *GhNAC4* at the seedling stage, in the emerging radicle,  
35 plumule, and cotyledons. *GhNAC4* expression was found in the the vascular bundles of the stem, leaf, main and



1 lateral roots, in the later stages of plant growth. It was also observed in the guard cells and meristems. During  
2 flowering, sepals, petal edges, and pollens showed *GhNAC4* expression (Fig. 5 & 6). Since *GhNAC4* promoter has  
3 very strong vasculature specific activities, the *GhNAC4* promoter carried several motifs responsible for this tissue-  
4 specific expression. Several copies of SEF1MOTIF, SEF3MOTIFGM, and SEF4MOTIFGM7S motifs were  
5 observed in the *GhNAC4* promoter. These are developing embryo, and seed-specific motifs found upstream of  
6 soybean seed storage  $\beta$ -conglycinin gene (Lessard et al. 1991). Binding sites for three-amino-acid-loop-extension  
7 (TALE) TF, that are known to control the formation and maintenance of meristem, were observed in the promoter of  
8 *GhNAC4* gene. These homeo-proteins provide a gene regulatory link between hormonal stimuli and development of  
9 shoot apical meristem (Hamant & Pautot 2010). OSE1ROOTNODULE and OSE2ROOTNODULE motifs are root  
10 specific elements found in the promoter of *Vicia faba* leghaemoglobin gene and are important for nodule formation  
11 by arbuscular mycorrhiza (Fehlberg et al. 2005). The ROOTMOTIFTAPOX1 element is found in the promoter of  
12 the *rolD* gene of *Agrobacterium rhizogenes*, which has a distinctive pattern in the root elongation zone and vascular  
13 bundle (Elmayan & Tepfer 1995). The CACTFTPPCA1 motif is a key component of mesophyll expression module  
14 1 (MEM1) in the promoter of *Flaveria trinervia* C4 phosphoenolpyruvate carboxylase gene and is sufficient for high  
15 mesophyll-specific expression (Gowik et al. 2004). The TAAAGSTKST1 is a guard cell-specific motif found  
16 upstream of  $K^+$  influx channel gene (*KST1*) in potato and is bound by StDof1 TF (Plesch et al. 2001).

17 Binding sites for quite a few other TF known to play roles in organogenesis and tissue-specific expression were  
18 predicted such as MYBST1, DOFCOREZM, SBP TF, TCR TF, AT HOOK TF, and WOX TF. *GhNAC4* has 26  
19 copies of DOFCOREZM motif, which is a binding site of DOF TFs that are plant specific and have a unique single  
20 zinc finger DNA binding domain. Key role of DOF transcription factors in the formation and functioning of plant  
21 vascular bundles is emerging (Le Hir & Bellini 2013). They directly or indirectly regulate the processes associated  
22 with the establishment and maintenance of the vascular system. HMG-I/Y TFs have an AT-hook region, which is a  
23 short conserved peptide that binds to AT-rich tracts of DNA in the minor groove and cause DNA bending. These  
24 TFs play an important role in chromatin structure and regulate gene expression by acting as TF co-factors. HMG-I/Y  
25 TFs are expressed in high levels in tissues showing rapid cell division. And, they are also known to play an  
26 important role in development and defense responses (Klosterman & Hadwiger 2002). Squamosa promoter binding  
27 protein (SBP) TFs are plant-specific TFs that are known to play a role both in vegetative phase change and flower  
28 development pathway, and their role in stress response is also emerging (Hou et al. 2013; Klein et al. 1996).  
29 Wuschel-related homeobox (WOX) TFs plays an important role in cell fate determination during all stages of plant  
30 development and shows very specific spatial and temporal expression (Hedman et al. 2013). Various motifs such as  
31 CARCGW8GAT, TGTCACACMCUCUMISIN and binding sites for MYBPZM, and TCR TFs known to be  
32 important for flower and fruit development were found. CARCGW8GAT is the binding site of MADS-box TF,  
33 AGAMOUS-like 15 (AGL15). AGL15 accumulates during embryo development and regulates somatic  
34 embryogenesis (Tang & Perry 2003). TGTCACACMCUCUMISIN is a fruit-specific motif found upstream of a  
35 subtilisin-like serine protease, cucumisin gene in melon (Yamagata et al. 2002). MYBPZM is an MYB homolog, P,  
36 transcription factor from maize that binds to CCT/AACC sequence and it controls red pigmentation in the floral  
37 organs by regulating the flavonoid biosynthetic pathway (Grotewold et al. 1994). Two pollen-specific motifs are

1 also found in the *GhNAC4* promoter, POLLEN1LELAT52, and GTGANTG10. POLLEN1LELAT52 is one of the  
2 two co-dependent motifs, found upstream of tomato *LAT52* gene that is essential for pollen development (Bate &  
3 Twell 1998). The GTGANTG10 motif is important for the pollen-specific expression of tobacco pectate lyases, *g10*  
4 gene (Rogers et al. 2001). *GhNAC4* has a unique tissue-specific expression pattern suggesting that this gene may be  
5 essential for plant growth and development.

6 In plants, soluble sugars not only function as a nutrient source but also act as signals regulating various growth and  
7 development pathways (Rolland et al. 2006). There is a cross-talk between the environmental stress response and the  
8 sugar signaling pathways to modulate plant metabolic responses by differential regulation of many genes (Ho et al.  
9 2001). Nutritional stress and sugar starvation responses may have an overlap with the response of a plant to  
10 environmental stresses (Couée et al. 2006). Exogenous application of glucose helped in the alleviation of the  
11 negative effects of salt stress in wheat seedlings by maintaining the ion homeostasis and activation of the antioxidant  
12 system (Hu et al. 2012). *GhNAC4* promoter carried 16 copies of CGACGOSAMY, two copies of WBOXHVIS01  
13 and one copy of SREATMSD motif. CGACGOSAMY3 motif acts as a coupling element for the G-box motif in the  
14 promoter of sugar starvation regulated rice amylase 3D (*OsAMY3D*) gene and plays a role in sugar responsiveness  
15 coupled to environmental stress regulation (Hwang et al. 1998). SUGAR SIGNALING IN BARLEY 2 (SUSIBA2)  
16 is a sugar-inducible WRKY TF which binds to both WBOX (WBOXHVIS01) and SURE (Sugar responsive  
17 element) in the barley isoamylase1 (*iso1*) promoter and is involved in the regulation of starch synthesis (Sun et al.  
18 2003). SREATMSD is a sugar-repressive element, found upstream of genes down-regulated during auxiliary bud  
19 growth after main stem decapitation (Tatematsu et al. 2005). SREATMSD is also involved in feed-back sugar  
20 repression of gene expression. Sugar-dependent repression of gene expression is an important regulatory mechanism  
21 for adjusting to the changes in the availability of carbon source and maintaining energy homeostasis between the  
22 source and sink tissues (Yu et al. 2015).

23 Plants responses to light are complex, and most of these responses such as development and stress signaling require  
24 the regulation in the expression of various nuclear and plastid-encoded genes and are mediated by photoreceptors.  
25 More than one photoreceptors may act on light-regulated genes thus allowing for tight control of their expression  
26 upon light stimulation (Kami et al. 2010). It has been hypothesized that light-responsive elements (LRE) have  
27 complex structures and consist of aggregates of connected binding sites for different transcription factors (Terzaghi  
28 & Cashmore 1995). Combinatorial interaction of different LREs in the promoter sequence such as GATA motif,  
29 ASL box, BOXII, IBOX, GT1 element, SORLIPs, TBOX, AE-BOX, and ATC motif, are required to confer light  
30 inducibility (Argüello-Astorga & Herrera-Estrella 1998). The combinatorial pairing of tetrameric repeats of GATA  
31 and GT1 motif to a minimal promoter responded to a broad spectrum of light as compared to multimeric repeats of  
32 these motifs alone (Chattopadhyay et al. 1998). GATA motif plays a role in light responsiveness and tissue  
33 specificity and has been shown to be involved in the light-dependent development of phloem tissue (Yin et al.  
34 1997). Vascular localization of *GhNAC4* (Fig. 6) could be partially attributed to the presence of 42 copies of the  
35 GATA motif in its promoter region. Several copies of GT1CONSENSUS motif were found in the *GhNAC4*  
36 promoter sequence. GT1CONSENSUS sequence (GRWAAW) was initially identified as Box II motif and is the



1 binding site of GT-1 TF. It is involved in light activation or dark repression and tissue-specificity (Hiratsuka et al.  
2 1994). SORLIPs (sequence over-represented in light-induced promoters) are light-responsive elements found in the  
3 promoters of genes that respond to the phytochrome A receptor pathway (Hudson & Quail 2003). SORLIP1AT and  
4 SORLIP2AT were found in the *GhNAC4* promoter sequence. TBOXATGAPB motif is found upstream of  
5 Arabidopsis *GAPDH* subunit B gene and serves as a positive modulator of light inducibility (Chan et al. 2001). This  
6 suggests that the tissue specificity of GhNAC4 to a certain extent is dependent on light inducibility.

7 Abiotic stress impedes plant growth and development which would compel the regulation of photosynthesis and  
8 carbohydrate partitioning. *GhNAC4* showed the presence of sugar and light regulatory motifs and is also up-  
9 regulated by abiotic stresses. This indicates that GhNAC4 may act to integrate stress responses with plant growth  
10 regulation.

11 Presence of key motifs related to various stresses in the promoter of *GhNAC4* indicates their putative function in the  
12 response of a cotton plant to environmental stresses. The transcript abundance of *GhNAC4* was altered by salinity,  
13 osmotic stress, oxidative stress, wounding, low and high temperatures and drought, as well as, by exogenous  
14 application of various phytohormones like ABA, BAP, MeJA, GA and ethylene implying that *GhNAC4* may  
15 participate in cotton plant's response to environmental stress. This work would provide a foundation for a  
16 comprehensive functional investigation of GhNAC4 TF in the future.

## 17 **Conclusion:**

18 In conclusion, expression, histochemical, and bioinformatics analyses showed that GhNAC4 not only expressed in  
19 vascular bundle and guard cells and is responsive to phytohormones like ABA, JA, CK, and auxin. But it is also up-  
20 regulated under external stimuli like drought, oxidative stress, osmotic stress, salinity and cold suggesting that  
21 GhNAC4 TF may be a common regulator of the molecular mechanism controlling plant development and stress  
22 responses. *GhNAC4* promoter may be employed in biotechnological approaches as a vascular-specific and stress-  
23 inducible promoter. In the future studies, characterization of the GhNAC4 promoter by the 5' deletion analysis  
24 would be carried out. Further characterization of GhNAC4 would provide new insights into the mechanisms  
25 integrating plant development with environmental stress conditions aided by hormonal stimuli. We are currently  
26 investigating the effects of GhNAC4 expression in transgenic plants and how GHNAC4 integrates stress response  
27 with plant developmental processes.

## 28 **Author contribution statement:**

29 TSV, PBK and PG conceived and designed the experiments. TSV, SM and PB performed the experiments. TSV  
30 analyzed the data. TSV and PBK wrote the manuscript. All authors read and approved the manuscript.

## 31 **Acknowledgements:**

1 TSV would like to acknowledge Council of scientific and industrial research (CSIR) for research fellowship. Also,  
2 Vikas Kumar Jain and Manimaran Panneer Selvam for critical reading of the manuscript.

### 3 **Conflict of interest:**

4 The authors declare they have no conflict of interest.

### 5 **References:**

- 6 Abe H, Urao T, Ito T, Seki M, Shinozaki K, Yamaguchi-Shinozaki K (2003) Arabidopsis AtMYC2 (bHLH) and  
7 AtMYB2 (MYB) Function as Transcriptional Activators in Abscisic Acid Signaling. *The Plant Cell*.  
8 <https://doi.org/10.1105/tpc.006130>
- 9 Abiri R, Shaharuddin NA, Maziah M, Yusof ZNB, Atabaki N, Sahebi M, et al. (2017) Role of ethylene and the  
10 APETALA 2/ethylene response factor superfamily in rice under various abiotic and biotic stress conditions.  
11 *Environmental and Experimental Botany*. <https://doi.org/10.1016/j.envexpbot.2016.10.015>
- 12 Al-Wahaibi MH (2011) Plant heat-shock proteins: A mini review. *Journal of King Saud University - Science*.  
13 <https://doi.org/10.1016/j.jksus.2010.06.022>
- 14 Argüello-Astorga G, & Herrera-Estrella L (1998) Evolution of light-regulated plant promoters. *Annual Review of*  
15 *Plant Physiology and Plant Molecular Biology*. <https://doi.org/10.1146/annurev.arplant.49.1.525>
- 16 Ballas N, Wong LM, & Theologis A (1993) Identification of the auxin-responsive element, AuxRE, in the primary  
17 indoleacetic acid-inducible gene, PS-IAA4/5, of pea (*Pisum sativum*). *Journal of Molecular Biology*.  
18 <https://doi.org/10.1006/jmbi.1993.1537>
- 19 Baniwal SK, Bharti K, Chan KY, Fauth M, Ganguli A, Kotak S, et al. (2004) Heat stress response in plants: A  
20 complex game with chaperones and more than twenty heat stress transcription factors. *Journal of Biosciences*.  
21 <https://doi.org/10.1007/BF02712120>
- 22 Bate N, & Twell D (1998) Functional architecture of a late pollen promoter: Pollen-specific transcription is  
23 developmentally regulated by multiple stage-specific and co-dependent activator elements. *Plant Molecular Biology*.  
24 <https://doi.org/10.1023/A:1006095023050>
- 25 Boter M, Ruíz-Rivero O, Abdeen A, & Prat S (2004) Conserved MYC transcription factors play a key role in  
26 jasmonate signaling both in tomato and Arabidopsis. *Genes and Development*. <https://doi.org/10.1101/gad.297704>
- 27 Bouzroud S, Gouiaa S, Hu N, Bernadac A, Mila I, Bendaou N, et al. (2018) Auxin response factors (ARFs) are  
28 potential mediators of auxin action in tomato response to biotic and abiotic stress (*Solanum lycopersicum*). *PLoS*  
29 *ONE*. <https://doi.org/10.1371/journal.pone.0193517>

- 1 Bradford MM (1976) A rapid and sensitive method for the quantitation of microgram quantities of protein utilizing  
2 the principle of protein-dye binding. *Analytical Biochemistry*. [https://doi.org/10.1016/0003-2697\(76\)90527-3](https://doi.org/10.1016/0003-2697(76)90527-3)
- 3 Chaikam V, & Karlson D (2008) Functional characterization of two cold shock domain proteins from *Oryza sativa*.  
4 *Plant, Cell and Environment*. <https://doi.org/10.1111/j.1365-3040.2008.01811.x>
- 5 Chan, CS, Guo L, & Shih MC (2001) Promoter analysis of the nuclear gene encoding the chloroplast  
6 glyceraldehyde-3-phosphate dehydrogenase B subunit of *Arabidopsis thaliana*. *Plant Molecular Biology*.  
7 <https://doi.org/10.1023/A:1010602031070>
- 8 Chang S, Puryear J, & Cairney J (1993) A simple and efficient method for isolating RNA from pine trees. *Plant*  
9 *Molecular Biology Reporter*. <https://doi.org/10.1007/BF02670468>
- 10 Chang WC, Lee TY, Huang HDa, Huang HY, & Pan RL (2008) PlantPAN: Plant promoter analysis navigator, for  
11 identifying combinatorial cis-regulatory elements with distance constraint in plant gene groups. *BMC Genomics*.  
12 <https://doi.org/10.1186/1471-2164-9-561>
- 13 Chattopadhyay S, Puente P, Deng XW, & Wei N (1998) Combinatorial interaction of light-responsive elements  
14 plays a critical role in determining the response characteristics of light-regulated promoters in *Arabidopsis*. *Plant*  
15 *Journal*. <https://doi.org/10.1046/j.1365-313X.1998.00180.x>
- 16 Chaves MM, Pereira JS, Maroco J, Rodrigues ML, Ricardo CPP, Osório ML, et al. (2002) How plants cope with  
17 water stress in the field. *Photosynthesis and growth*. *Annals of Botany*. <https://doi.org/10.1093/aob/mcf105>
- 18 Colebrook EH, Thomas SG, Phillips AL, & Hedden P (2014) The role of gibberellin signalling in plant responses to  
19 abiotic stress. *Journal of Experimental Biology*. <https://doi.org/10.1242/jeb.089938>
- 20 Couée I, Sulmon C, Gouesbet G, & El Amrani A (2006) Involvement of soluble sugars in reactive oxygen species  
21 balance and responses to oxidative stress in plants. *Journal of Experimental Botany*.  
22 <https://doi.org/10.1093/jxb/erj027>
- 23 Elmayer T, & Tepfer M (1995) Evaluation in tobacco of the organ specificity and strength of the rolD promoter,  
24 domain A of the 35S promoter and the 35S2 promoter. *Transgenic Research*. <https://doi.org/10.1007/BF01973757>
- 25 Fehlberg V, Vieweg MF, Dohmann EMN, Hohnjec N, Pühler A, Perlick AM, & Küster H (2005) The promoter of  
26 the leghaemoglobin gene *VfLb29*: Functional analysis and identification of modules necessary for its activation in  
27 the infected cells of root nodules and in the arbuscule-containing cells of mycorrhizal roots. *Journal of Experimental*  
28 *Botany*. <https://doi.org/10.1093/jxb/eri074>
- 29 Fujimoto SY, Ohta M, Usui A, Shinshi H, & Ohme-Takagi M (2000) *Arabidopsis* Ethylene-Responsive Element  
30 Binding Factors Act as Transcriptional Activators or Repressors of GCC Box-Mediated Gene Expression. *The Plant*  
31 *Cell*. <https://doi.org/10.2307/3870944>

- 1 Fujita Y, Fujita M, Shinozaki K, & Yamaguchi-Shinozaki K (2011) ABA-mediated transcriptional regulation in  
2 response to osmotic stress in plants. *Journal of Plant Research*. <https://doi.org/10.1007/s10265-011-0412-3>
- 3 Geng Y, Wu R, Wee CW, Xie F, Wei X, Chan PMY, et al. (2013) A Spatio-Temporal Understanding of Growth  
4 Regulation during the Salt Stress Response in Arabidopsis. *The Plant Cell*. <https://doi.org/10.1105/tpc.113.112896>
- 5 Gomez-Cadenas A, Zentella R, Walker-Simmons MK, & Ho THD (2001) Gibberellin/Abscisic Acid Antagonism in  
6 Barley Aleurone Cells: Site of Action of the Protein Kinase PKABA1 in Relation to Gibberellin Signaling  
7 Molecules. *THE PLANT CELL ONLINE*. <https://doi.org/10.1105/tpc.13.3.667>
- 8 Gowik U, Burscheidt J, Akyildiz M, Schlue U, Koczor M, Streubel M, & Westhoff P (2004) cis-Regulatory  
9 Elements for Mesophyll-Specific Gene Expression in the C 4 Plant *Flaveria trinervia*, the Promoter of the C 4  
10 Phosphoenolpyruvate Carboxylase Gene. *The Plant Cell*. <https://doi.org/10.1105/tpc.019729.C>
- 11 Grotewold E, Drummond BJ, Bowen B, & Peterson T (1994) The myb-homologous P gene controls phlobaphene  
12 pigmentation in maize floral organs by directly activating a flavonoid biosynthetic gene subset. *Cell*.  
13 [https://doi.org/10.1016/0092-8674\(94\)90117-1](https://doi.org/10.1016/0092-8674(94)90117-1)
- 14 Gu C, Guo ZH, Hao PP, Wang GM, Jin ZM, & Zhang SL (2017) Multiple regulatory roles of AP2/ERF  
15 transcription factor in angiosperm. *Botanical Studies*. <https://doi.org/10.1186/s40529-016-0159-1>
- 16 Gubler F, Kalla R, Roberts JK, & Jacobsen JV (1995) Gibberellin-Regulated Expression of a myb Gene in Barley  
17 Aleurone Cells: Evidence for Myb Transactivation of a High-pl alpha-Amylase Gene Promoter. *The Plant Cell*.  
18 <https://doi.org/10.1105/tpc.7.11.1879>
- 19 Guo Y, & Gan S (2006) AtNAP, a NAC family transcription factor, has an important role in leaf senescence. *Plant*  
20 *Journal*. <https://doi.org/10.1111/j.1365-313X.2006.02723.x>
- 21 Hall, TA (1999) BioEdit: a user-friendly biological sequence alignment editor and analysis program for Windows  
22 95/98/NT. *Nucleic Acids Symposium Series*. <https://doi.org/citeulike-article-id:691774>
- 23 Hamant O, & Pautot V (2010) Plant development: A TALE story. *Comptes Rendus - Biologies*.  
24 <https://doi.org/10.1016/j.crv.2010.01.015>
- 25 Hardtke CS, & Berleth T (1998) The Arabidopsis gene MONOPTEROS encodes a transcription factor mediating  
26 embryo axis formation and vascular development. *EMBO Journal*. <https://doi.org/10.1093/emboj/17.5.1405>
- 27 Hattori T, Totsuka M, Hobo T, Kagaya Y, & Yamamoto-Toyoda A (2002) Experimentally determined sequence  
28 requirement of ACGT-containing abscisic acid response element. *Plant and Cell Physiology*.  
29 <https://doi.org/10.1093/pcp/pcf014>

- 1 He XJ, Mu RL, Cao WH, Zhang ZG, Zhang JS, & Chen SY (2005) AtNAC2, a transcription factor downstream of  
2 ethylene and auxin signaling pathways, is involved in salt stress response and lateral root development. *Plant*  
3 *Journal*. <https://doi.org/10.1111/j.1365-313X.2005.02575.x>
- 4 Hedman H, Zhu T, von Arnold S, & Sohlberg JJ (2013) Analysis of the WUSCHEL-RELATED HOMEODOMAIN gene  
5 family in the conifer *Picea abies* reveals extensive conservation as well as dynamic patterns. *BMC Plant Biology*.  
6 <https://doi.org/10.1186/1471-2229-13-89>
- 7 Higo K, Ugawa Y, Iwamoto M, & Korenaga T (1999) Plant cis-acting regulatory DNA elements (PLACE) database:  
8 1999. *Nucleic Acids Research*. <https://doi.org/10.1093/nar/27.1.297>
- 9 Hiratsuka K, Wu X, Fukuzawa H, Chua NH (1994) Molecular Dissection of GT-1 from *Arabidopsis*. *The Plant Cell*.  
10 <https://doi.org/10.1105/tpc.6.12.1805>
- 11 Ho S-L, Chao Y-C, Tong W-F, & Yu S-M (2001) Sugar Coordinately and Differentially Regulates Growth- and  
12 Stress-Related Gene Expression via a Complex Signal Transduction Network and Multiple Control Mechanisms.  
13 *Plant Physiology*. <https://doi.org/10.1104/pp.125.2.877>
- 14 Horsch RB, Fry JE, Hoffmann NL, Eichholtz D, Rogers SG, & Fraley RT (1985) A simple and general method for  
15 transferring genes into plants. *Science*, 227(4691), 1229–1231. <https://doi.org/10.1126/science.227.4691.1229>
- 16 Hou H, Yan Q, Wang X, & Xu H (2013) A SBP-Box Gene VpSBP5 from Chinese Wild *Vitis* Species Responds to  
17 *Erysiphe necator* and Defense Signaling Molecules. *Plant Molecular Biology Reporter*.  
18 <https://doi.org/10.1007/s11105-013-0591-2>
- 19 Hu H, Dai M, Yao J, Xiao B, Li X, Zhang Q, & Xiong L (2006) Overexpressing a NAM, ATAF, and CUC (NAC)  
20 transcription factor enhances drought resistance and salt tolerance in rice. *Proceedings of the National Academy of*  
21 *Sciences*. <https://doi.org/10.1073/pnas.0604882103>
- 22 Hu M, Sh, Z, Zhang Z, Zhang Y, & Li H (2012) Effects of exogenous glucose on seed germination and antioxidant  
23 capacity in wheat seedlings under salt stress. *Plant Growth Regulation*. <https://doi.org/10.1007/s10725-012-9705-3>
- 24 Hudson ME & Quail PH (2003) Identification of Promoter Motifs Involved in the Network of Phytochrome A-  
25 Regulated Gene Expression by Combined Analysis of Genomic Sequence and Microarray Data. *Plant Physiology*.  
26 <https://doi.org/10.1104/pp.103.030437>
- 27 Hwang YS, Karrer EE, Thomas BR, Chen L, & Rodriguez RL (1998) Three cis-elements required for rice  $\alpha$ -  
28 amylase Amy3D expression during sugar starvation. *Plant Molecular Biology*.  
29 <https://doi.org/10.1023/A:1005956104636>
- 30 Jefferson RA (1989) The GUS reporter gene system. *Nature*. <https://doi.org/10.1038/342837a0>

- 1 Jeon J, & Kim J (2013) Arabidopsis Response Regulator1 and Arabidopsis Histidine Phosphotransfer Protein2  
2 (AHP2), AHP3, and AHP5 Function in Cold Signaling. *Plant Physiology*. <https://doi.org/10.1104/pp.112.207621>
- 3 Joshi CP (1987) An inspection of the domain between putative TATA box and translation start site in 79 plant  
4 genes. *Nucleic Acids Research*. <https://doi.org/10.1093/nar/15.16.6643>
- 5 Kami C, Lorrain S, Hornitschek P, & Fankhauser C (2010) Light-regulated plant growth and development. *Current*  
6 *Topics in Developmental Biology*. [https://doi.org/10.1016/S0070-2153\(10\)91002-8](https://doi.org/10.1016/S0070-2153(10)91002-8)
- 7 Kaplan B, Davydov O, Knight H, Galon Y, Knight MR, Fluhr R, & Fromm H (2006) Rapid Transcriptome Changes  
8 Induced by Cytosolic Ca<sup>2+</sup> Transients Reveal ABRE-Related Sequences as Ca<sup>2+</sup>-Responsive cis Elements in  
9 Arabidopsis. *The Plant Cell*. <https://doi.org/10.1105/tpc.106.042713>
- 10 Kiełbowicz-Matuk A (2012) Involvement of plant C<sub>2</sub>H<sub>2</sub>-type zinc finger transcription factors in stress responses.  
11 *Plant Science*. <https://doi.org/10.1016/j.plantsci.2011.11.015>
- 12 Klein J, Saedler H, & Huijser P (1996) A new family of DNA binding proteins includes putative transcriptional  
13 regulators of the *Antirrhinum majus* floral meristem identity gene SQUAMOSA. *Molecular and General Genetics*.  
14 <https://doi.org/10.1007/s004380050046>
- 15 Klosterman, SJ, & Hadwiger LA (2002) Plant HMG proteins bearing the AT-hook motif. *Plant Science*.  
16 [https://doi.org/10.1016/S0168-9452\(02\)00056-0](https://doi.org/10.1016/S0168-9452(02)00056-0)
- 17 Knight H (2000) Calcium signaling during abiotic stress in plants. *International Review of Cytology*.  
18 [https://doi.org/10.1016/S0074-7696\(08\)62707-2](https://doi.org/10.1016/S0074-7696(08)62707-2)
- 19 Ko JH, Yang SH, Park AH, Lerouxel O, & Han KH (2007) ANAC012, a member of the plant-specific NAC  
20 transcription factor family, negatively regulates xylary fiber development in *Arabidopsis thaliana*. *Plant Journal*.  
21 <https://doi.org/10.1111/j.1365-313X.2007.03109>
- 22 Kotak S, Larkindale J, Lee U, von Koskull-Döring P, Vierling E, & Scharf KD (2007) Complexity of the heat stress  
23 response in plants. *Current Opinion in Plant Biology*. <https://doi.org/10.1016/j.pbi.2007.04.011>
- 24 Kubo M, Udagawa M, Nishikubo N, Horiguchi G, Yamaguchi M, Ito J, et al. (2005) Transcription switches for  
25 protoxylem and metaxylem vessel formation. *Genes and Development*. <https://doi.org/10.1101/gad.1331305>
- 26 Kuppup S, Mishra N, Hu R, Sun L, Zhu X, Shen G, et al (2013) Water-Deficit Inducible Expression of a Cytokinin  
27 Biosynthetic Gene IPT Improves Drought Tolerance in Cotton. *PLoS ONE*.  
28 <https://doi.org/10.1371/journal.pone.0064190>
- 29 Lanahan MB, Ho TH, Rogers SW, & Rogers JC (1992) A gibberellin response complex in cereal alpha-amylase  
30 gene promoters. *The Plant Cell*. <https://doi.org/10.1105/tpc.4.2.203>

- 1 Le Hir R, & Bellini C (2013) The Plant-Specific Dof Transcription Factors Family: New Players Involved in  
2 Vascular System Development and Functioning in Arabidopsis. *Frontiers in Plant Science*.  
3 <https://doi.org/10.3389/fpls.2013.00164>
- 4 Lescot M, Dehais P, Thijs G, Marchal K, Van de Peer Y, Rouze P, & Rombauts S (2002) PlantCARE, a database of  
5 plant cis-acting regulatory elements and a portal to tools for in silico analysis of promoter sequences. *Nucleic Acids*  
6 *Research*. <https://doi.org/10.1093/nar/30.1.325>
- 7 Lessard PA, Allen RD, Bernier F, Crispino JD, Fujiwara T, & Beachy RN (1991) Multiple nuclear factors interact  
8 with upstream sequences of differentially regulated beta-conglycinin genes. *Plant Molecular Biology*.  
9 <https://doi.org/10.1007/Bf00023991>
- 10 Li W, Huang GQ, Zhou W, Xia XC, Li DD, & Li XB (2014) A cotton (*Gossypium hirsutum*) gene encoding a NAC  
11 transcription factor is involved in negative regulation of plant xylem development. *Plant Physiology and*  
12 *Biochemistry*. <https://doi.org/10.1016/j.plaphy.2014.07.022>
- 13 Licausi F, Ohme-Takagi M, & Perata P (2013) APETALA2/Ethylene Responsive Factor (AP2/ERF) transcription  
14 factors: mediators of stress responses and developmental programs. *The New Phytologist*.  
15 <https://doi.org/10.1111/nph.12291>
- 16 Livak K, & Schmittgen T (2001) Analysis of relative gene expression data using real-time quantitative PCR and the  
17  $2^{-\Delta\Delta C_T}$  method. *Methods*. <https://doi.org/10.1006/meth.2001.1262>
- 18 Lorenzo O, Chico JM, Sanchez-Serrano JJ, Solano R (2004) JASMONATE-INSENSITIVE1 Encodes a MYC  
19 Transcription Factor Essential to Discriminate between Different Jasmonate-Regulated Defense Responses in  
20 Arabidopsis. *The Plant Cell*. <https://doi.org/10.1105/tpc.022319>
- 21 Luo H, Song F, Goodman RM, & Zheng Z (2005) Up-regulation of OsBIHD1, a rice gene encoding BELL  
22 homeodomain transcriptional factor, in disease resistance responses. *Plant Biology*. [https://doi.org/10.1055/s-2005-](https://doi.org/10.1055/s-2005-865851)  
23 865851
- 24 Maeda K, Kimura S, Demura T, Takeda J, & Ozeki Y (2005) DcMYB1 acts as a transcriptional activator of the  
25 carrot phenylalanine ammonia-lyase gene (DcPAL1) in response to elicitor treatment, UV-B irradiation and the  
26 dilution effect. *Plant Molecular Biology*. <https://doi.org/10.1007/s11103-005-0910-6>
- 27 Meng C, Cai C, Zhang T, & Guo W (2009) Characterization of six novel NAC genes and their responses to abiotic  
28 stresses in *Gossypium hirsutum* L. *Plant Science*. <https://doi.org/10.1016/j.plantsci.2008.12.003>
- 29 Mitsuda N, Seki M, Shinozaki K, & Ohme-Takagi M (2005) The NAC Transcription Factors NST1 and NST2 of  
30 Arabidopsis Regulate Secondary Wall Thickenings and Are Required for Anther Dehiscence. *The Plant Cell*.  
31 <https://doi.org/10.1105/tpc.105.036004>



- 1 Mitsuda N, Iwase A, Yamamoto H, Yoshida M, Seki M, Shinozaki K, & Ohme-Takagi M (2007) NAC  
2 Transcription Factors, NST1 and NST3, Are Key Regulators of the Formation of Secondary Walls in Woody  
3 Tissues of Arabidopsis. *The Plant Cell*. <https://doi.org/10.1105/tpc.106.047043>
- 4 Murray MG, & Thompson WF (1980) Rapid isolation of high molecular weight plant DNA. *Nucleic Acids*  
5 *Research*. <https://doi.org/10.1093/nar/8.19.4321>
- 6 Nakashima K, Tran LSP, Van Nguyen D, Fujita M, Maruyama K, Todaka D et al. (2007) Functional analysis of a  
7 NAC-type transcription factor OsNAC6 involved in abiotic and biotic stress-responsive gene expression in rice.  
8 *Plant Journal*. <https://doi.org/10.1111/j.1365-313X.2007.03168.x>
- 9 Nguyen KH, Ha CV, Nishiyama R, Watanabe Y, Leyva-González MA, Fujita Y, et al. (2016) Arabidopsis type B  
10 cytokinin response regulators ARR1, ARR10, and ARR12 negatively regulate plant responses to drought.  
11 *Proceedings of the National Academy of Sciences*. <https://doi.org/10.1073/pnas.1600399113>
- 12 Nishiuchi T, Shinshi H, & Suzuki K (2004) Rapid and transient activation of transcription of the ERF3 gene by  
13 wounding in tobacco leaves: Possible involvement of NtWRKYs and autorepression. *Journal of Biological*  
14 *Chemistry*. <https://doi.org/10.1074/jbc.M409674200>
- 15 Nuruzzaman M, Manimekalai R, Sharoni AM, Satoh K, Kondoh H, Ooka H, & Kikuchi S (2010) Genome-wide  
16 analysis of NAC transcription factor family in rice. *Gene*. <https://doi.org/10.1016/j.gene.2010.06.008>
- 17 Ogawa M, Hanada A, Yamauchi Y, Kuwahara A, Kamiya Y, & Yamaguchi, S. (2003) Gibberellin Biosynthesis and  
18 Response during Arabidopsis Seed Germination. *The Plant Cell*. <https://doi.org/10.1105/tpc.011650>
- 19 Olsen AN, Ernst HA, Leggio LL, & Skriver K (2005) NAC transcription factors: Structurally distinct, functionally  
20 diverse. *Trends in Plant Science*. <https://doi.org/10.1016/j.tplants.2004.12.010>
- 21 Park HC, Kim ML, Kang YH, Jeon JM, Yoo JH, Kim MC, et al (2004) Pathogen- and NaCl-Induced Expression of  
22 the SCaM-4 Promoter Is Mediated in Part by a GT-1 Box That Interacts with a GT-1-Like Transcription Factor.  
23 *Plant Physiology*. <https://doi.org/10.1104/pp.104.041442>
- 24 Peng J, Li Z, Wen X, Li W, Shi H, Yang L, et al. (2014) Salt-Induced Stabilization of EIN3/EIL1 Confers Salinity  
25 Tolerance by Deterring ROS Accumulation in Arabidopsis. *PLoS Genetics*.  
26 <https://doi.org/10.1371/journal.pgen.1004664>
- 27 Plesch G, Ehrhardt T, & Mueller-Roeber B (2001) Involvement of TAAAG elements suggests a role for Dof  
28 transcription factors in guard cell-specific gene expression. *Plant Journal*. [https://doi.org/10.1046/j.1365-](https://doi.org/10.1046/j.1365-313X.2001.01166)  
29 [313X.2001.01166](https://doi.org/10.1046/j.1365-313X.2001.01166)

- 1 Pontier D, Balagué C, Bezombes-Marion I, Tronchet M, Deslandes L, & Roby D (2001) Identification of a novel  
2 pathogen-responsive element in the promoter of the tobacco gene HSR203J, a molecular marker of the  
3 hypersensitive response. *Plant Journal*. <https://doi.org/10.1016/j.solener.2018.07.059>
- 4 Quan R, Wang J, Yang D, Zhang H, Zhang Z, & Huang R (2017) EIN3 and SOS2 synergistically modulate plant  
5 salt tolerance. *Scientific Reports*. <https://doi.org/10.1038/srep44637>
- 6 Richards DE, King KE, Ait-ali T, & Harberd NP (2001) How Gibberellin regulates plant growth and development: A  
7 Molecular Genetic Analysis of Gibberellin Signaling. *Annual Review of Plant Physiology and Plant Molecular*  
8 *Biology*. <https://doi.org/10.1146/annurev.arplant.52.1.67>
- 9 Robert-Seilaniantz A, Grant M, & Jones JDG (2011) Hormone Crosstalk in Plant Disease and Defense: More Than  
10 Just jasmonate-salicylate Antagonism. *Annual Review of Phytopathology*. [https://doi.org/10.1146/annurev-phyto-](https://doi.org/10.1146/annurev-phyto-073009-114447)  
11 [073009-114447](https://doi.org/10.1146/annurev-phyto-073009-114447)
- 12 Rogers HJ, Bate N, Combe J, Sullivan J, Sweetman J, Swan C, et al. (2001) Functional analysis of cis-regulatory  
13 elements within the promoter of the tobacco late pollen gene g10. *Plant Molecular Biology*.  
14 <https://doi.org/10.1023/A:1010695226241>
- 15 Rogers JC, Lanahan MB, Rogers SW, Casaretto J, Ho TD, & Shen QJ (1994) The cis-Acting Gibberellin Response  
16 Complex in High-pl [alpha]-Amylase Gene Promoters (Requirement of a Coupling Element for High-Level  
17 Transcription). *Plant Physiology*. <https://doi.org/10.1104/pp.105.1.151>
- 18 Rolland F, Baena-Gonzalez E, & Sheen J (2006) Sugar sensing and signaling in plants: Conserved and Novel  
19 Mechanisms. *Annual Review of Plant Biology*. <https://doi.org/10.1146/annurev.arplant.57.032905.105441>
- 20 Sablowski RWM, & Meyerowitz EM (1998) A homolog of NO APICAL MERISTEM is an immediate target of the  
21 floral homeotic genes APETALA3/PISTILLATA. *Cell*. [https://doi.org/10.1016/S0092-8674\(00\)80902-2](https://doi.org/10.1016/S0092-8674(00)80902-2)
- 22 Schindler U, Beckmann H, Cashmore AR (1992) TGA1 and G-Box Binding Factors: Two Distinct Classes of  
23 Arabidopsis Leucine Zipper Proteins Compete for the G-Box-Like Element TGACGTGG. *The Plant Cell*.  
24 <https://doi.org/10.1105/tpc.4.10.1309>
- 25 Shearer HL, Cheng YT, Wang L, Liu J, Boyle P, Després C, et al. (2012) Arabidopsis Clade I TGA Transcription  
26 Factors Regulate Plant Defenses in an NPR1-Independent Fashion. *Molecular Plant-Microbe Interactions*.  
27 <https://doi.org/10.1094/MPMI-09-11-0256>
- 28 Shen QX, Zhang PN, & Ho THD (1996) Modular nature of abscisic acid (ABA) response complexes: Composite  
29 promoter units that are necessary and sufficient for ABA induction of gene expression in barley. *Plant Cell*.  
30 <https://doi.org/10.2307/3870355>

- 1 Shinozaki K, & Yamaguchi-Shinozaki K (2000) Molecular responses to dehydration and low temperature:  
2 Differences and cross-talk between two stress signaling pathways. *Current Opinion in Plant Biology*.  
3 [https://doi.org/10.1016/S1369-5266\(00\)00067-4](https://doi.org/10.1016/S1369-5266(00)00067-4)
- 4 Simpson SD, Nakashima K, Narusaka Y, Seki M, Shinozaki K, & Yamaguchi-Shinozaki K (2003) Two different  
5 novel cis-acting elements of *erd1*, a *clpA* homologous Arabidopsis gene function in induction by dehydration stress  
6 and dark-induced senescence. *Plant Journal*. <https://doi.org/10.1046/j.1365-313X.2003.01624>
- 7 Singh KB (1998) Transcriptional Regulation in Plants: The Importance of Combinatorial Control. *Plant Physiology*,  
8 118(4), 1111–1120. <https://doi.org/10.1104/pp.118.4.1111>
- 9 Singh KB, Foley RC, & Oñate-Sánchez L (2002) Transcription factors in plant defense and stress responses. *Current*  
10 *Opinion in Plant Biology*. [https://doi.org/10.1016/S1369-5266\(02\)00289-3](https://doi.org/10.1016/S1369-5266(02)00289-3)
- 11 Skriver K, Olsen FL, Rogers JC, & Mundy J (1991) cis-acting DNA elements responsive to gibberellin and its  
12 antagonist abscisic acid. *Proceedings of the National Academy of Sciences*. <https://doi.org/10.1073/pnas.88.16.7266>
- 13 Sobajima H, Tani T, Chujo T, Okada K, Suzuki K, Mori S, et al. (2007) Identification of a jasmonic acid-responsive  
14 region in the promoter of the rice 12-oxophytodienoic acid reductase 1 gene *OsOPR1*. *Biosci Biotechnol Biochem*.  
15 <https://doi.org/10.1271/bbb.70532>
- 16 Solano R, Stepanova A, Chao Q, & Ecker JR (1998) Nuclear events in ethylene signaling: A transcriptional cascade  
17 mediated by *ETHYLENE-INSENSITIVE3* and *ETHYLENE-RESPONSE-FACTOR1*. *Genes and Development*.  
18 <https://doi.org/10.1101/gad.12.23.3703>
- 19 Souer E, Van Houwelingen A, Kloos D, Mol J, & Koes R (1996) The *no apical Meristem* gene of *petunia* is required  
20 for pattern formation in embryos and flowers and is expressed at meristem and primordia boundaries. *Cell*.  
21 [https://doi.org/10.1016/S0092-8674\(00\)81093-4](https://doi.org/10.1016/S0092-8674(00)81093-4)
- 22 Sperotto RA, Ricachenevsky FK, Duarte GL, Boff T, Lopes KL, Sperb ER, et al. (2009) Identification of up-  
23 regulated genes in flag leaves during rice grain filling and characterization of *OsNAC5*, a new ABA-dependent  
24 transcription factor. *Planta*. <https://doi.org/10.1007/s00425-009-1000-9>
- 25 Stockinger EJ, Gilmour SJ, & Thomashow MF (1997) Arabidopsis thaliana *CBF1* encodes an AP2 domain-  
26 containing transcriptional activator that binds to the C-repeat. *Proc Natl Acad Sci USA*.  
27 <https://doi.org/10.1073/pnas.94.3.1035>
- 28 Sun C, Palmqvist S, Olsson H, Borén M, Ahlandsberg S & Jansson C (2003) A Novel WRKY Transcription Factor,  
29 *SUSIBA2*, Participates in Sugar Signaling in Barley by Binding to the Sugar-Responsive Elements of the *iso1*  
30 Promoter. *The Plant Cell*. <https://doi.org/10.1105/tpc.014597>

- 1 Sun H, Hu M, Li J, Chen L, Li M, Zhang S, et al. (2018) Comprehensive analysis of NAC transcription factors  
2 uncovers their roles during fiber development and stress response in cotton. *BMC Plant Biology*, 18(1), 1–15.  
3 <https://doi.org/10.1186/s12870-018-1367-5>
- 4 Tang W, & Perry SE (2003) Binding site selection for the plant MADS domain protein AGL15: an in vitro and in  
5 vivo study. *The Journal of Biological Chemistry*. <https://doi.org/10.1074/jbc.M212976200>
- 6 Tatematsu K, Ward S, Leyser O, Kamiya Y, & Nambara E (2005) Identification of cis-Elements That Regulate  
7 Gene Expression during Initiation of Axillary Bud Outgrowth in Arabidopsis. *Plant Physiology*.  
8 <https://doi.org/10.1104/pp.104.057984>
- 9 Terzaghi WB, & Cashmore AR (1995) Light-Regulated Transcription. *Annual Review of Plant Physiology and*  
10 *Plant Molecular Biology*. <https://doi.org/10.1146/annurev.pp.46.060195.002305>
- 11 Tian Y, & Lu XY (2006) The molecular mechanism of ethylene signal transduction. *South African Journal of*  
12 *Botany*. <https://doi.org/10.1016/j.sajb.2006.03.010>
- 13 Tran LSP, Nakashima K, Shinozaki K, & Yamaguchi-Shinozaki K (2007) Plant Gene Networks in Osmotic Stress  
14 Response: From Genes to Regulatory Networks. *Methods in Enzymology*. [https://doi.org/10.1016/S0076-](https://doi.org/10.1016/S0076-6879(07)28006-1)  
15 [6879\(07\)28006-1](https://doi.org/10.1016/S0076-6879(07)28006-1)
- 16 Venter M (2007) Synthetic promoters: genetic control through cis engineering. *Trends in Plant Science*.  
17 <https://doi.org/10.1016/j.tplants.2007.01.002>
- 18 Verma V, Ravindran P, & Kumar PP (2016) Plant hormone-mediated regulation of stress responses. *BMC Plant*  
19 *Biology*. <https://doi.org/10.1186/s12870-016-0771-y>
- 20 Wang HZ, & Dixon RA (2012) On-off switches for secondary cell wall biosynthesis. In *Molecular Plant*.  
21 <https://doi.org/10.1093/mp/ssr098>
- 22 Wang W, Vinocur B, & Altman A (2003) Plant responses to drought, salinity and extreme temperatures: Towards  
23 genetic engineering for stress tolerance. *Planta*. <https://doi.org/10.1007/s00425-003-1105-5>
- 24 Washio K (2001) Identification of Dof proteins with implication in the gibberellin-regulated expression of a  
25 peptidase gene following the germination of rice grains. *Biochimica et Biophysica Acta - Gene Structure and*  
26 *Expression*. [https://doi.org/10.1016/S0167-4781\(01\)00251-2](https://doi.org/10.1016/S0167-4781(01)00251-2)
- 27 Washio K (2003) Functional Dissections between GAMYB and Dof Transcription Factors Suggest a Role for  
28 Protein-Protein Associations in the Gibberellin-Mediated Expression of the RAmY1A Gene in the Rice Aleurone.  
29 *Plant Physiology*. <https://doi.org/10.1104/pp.103.027334>

- 1 Wasternack C (2007) Jasmonates: An update on biosynthesis, signal transduction and action in plant stress response,  
2 growth and development. *Annals of Botany*. <https://doi.org/10.1093/aob/mcm079>
- 3 Werner T, & Schmülling T (2009) Cytokinin action in plant development. *Current Opinion in Plant Biology*.  
4 <https://doi.org/10.1016/j.pbi.2009.07.002>
- 5 Xu N, Hagen G, & Guilfoyle T (1997) Multiple auxin response modules in the soybean SAUR 15A promoter. *Plant*  
6 *Science*. [https://doi.org/10.1016/S0168-9452\(97\)00110-6](https://doi.org/10.1016/S0168-9452(97)00110-6)
- 7 Xue GP (2002) An AP2 domain transcription factor HvCBF1 activates expression of cold-responsive genes in  
8 barley through interaction with a (G/a)(C/t)CGAC motif. *Biochimica et Biophysica Acta - Gene Structure and*  
9 *Expression*. [https://doi.org/10.1016/S0167-4781\(02\)00410-4](https://doi.org/10.1016/S0167-4781(02)00410-4)
- 10 Yamagata H, Yonesu K, Hirata A, & Aizono Y (2002) TGTCACA motif is a novel cis-regulatory enhancer element  
11 involved in fruit-specific expression of the cucumisin gene. *Journal of Biological Chemistry*.  
12 <https://doi.org/10.1074/jbc.M109946200>
- 13 Yamaguchi-Shinozaki K, & Shinozaki K (2005) Organization of cis-acting regulatory elements in osmotic- and  
14 cold-stress-responsive promoters. *Trends in Plant Science*. <https://doi.org/10.1016/j.tplants.2004.12.012>
- 15 Yamamoto S, Nakano T, Suzuki K, & Shinshi H (2004) Elicitor-induced activation of transcription via W box-  
16 related cis-acting elements from a basic chitinase gene by WRKY transcription factors in tobacco. *Biochimica et*  
17 *Biophysica Acta - Gene Structure and Expression*. <https://doi.org/10.1016/j.bbaexp.2004.07.005>
- 18 Yang JH, & Wang H (2016) Molecular Mechanisms for Vascular Development and Secondary Cell Wall Formation.  
19 *Frontiers in Plant Science*. <https://doi.org/10.3389/fpls.2016.00356>
- 20 Yin Y, Chen L, & Beachy R (1997) Promoter elements required for phloem-specific gene expression from the  
21 RTBV promoter in rice. *Plant Journal*. <https://doi.org/10.1046/j.1365-313X.1997.12051179>
- 22 Yokoyama A, Yamashino T, Amano YI, Tajima Y, Imamura A, Sakakibara H, & Mizuno T (2007) Type-B ARR  
23 transcription factors, ARR10 and ARR12, are implicated in cytokinin-mediated regulation of protoxylem  
24 differentiation in roots of *Arabidopsis thaliana*. *Plant and Cell Physiology*. <https://doi.org/10.1093/pcp/pcl040>
- 25 Yu SM, Lo SF, & Ho THD (2015) Source-Sink Communication: Regulated by Hormone, Nutrient, and Stress  
26 Cross-Signaling. *Trends in Plant Science*. <https://doi.org/10.1016/j.tplants.2015.10.009>
- 27 Zentella R, Yamauchi D, & Ho TD (2002) Molecular Dissection of the Gibberellin/Abscisic Acid Signaling  
28 Pathways by Transiently Expressed RNA Interference in Barley Aleurone Cells. *The Plant Cell*.  
29 <https://doi.org/10.1105/tpc.003376>

- 1 Zhang J, Huang GQ, Zou D, Yan JQ, Li Y, Hu S, & Li XB (2018) The cotton (*Gossypium hirsutum*) NAC  
 2 transcription factor (FSN1) as a positive regulator participates in controlling secondary cell wall biosynthesis and  
 3 modification of fibers. *New Phytologist*. <https://doi.org/10.1111/nph.14864>
- 4 Zhao C, Avci U, Grant EH, Haigler CH, & Beers EP (2008) XND1, a member of the NAC domain family in  
 5 *Arabidopsis thaliana*, negatively regulates lignocellulose synthesis and programmed cell death in xylem. *Plant*  
 6 *Journal*. <https://doi.org/10.1111/j.1365-313X.2007.03350.x>
- 7 Zhao Y (2010) Auxin Biosynthesis and Its Role in Plant Development. *Annual Review of Plant Biology*.  
 8 <https://doi.org/10.1146/annurev-arplant-042809-112308>
- 9 Zhu JK (2016) Abiotic Stress Signaling and Responses in Plants. *Cell*. <https://doi.org/10.1016/j.cell.2016.08.029>
- 10 Zhu Z, An F, Feng Y, Li P, Xue L, A M, et al. (2011) Derepression of ethylene-stabilized transcription factors  
 11 (EIN3/EIL1) mediates jasmonate and ethylene signaling synergy in *Arabidopsis*. *Proceedings of the National*  
 12 *Academy of Sciences*. <https://doi.org/10.1073/pnas.1103959108>

13 **Tables:**

14 **Table 1**

| Primer     | Sequence (5'-3')                  | Description                                |
|------------|-----------------------------------|--------------------------------------------|
| GhNACPRO-F | TATCTGGATCCGGCCTCATAATTGCATCAC    | Cloning primers for <i>GhNAC4</i> promoter |
| GhNACPRO-R | TACATACTGCAGGATTCTAAAGTTTTCTTGCCG |                                            |
| HptII-F    | TATTTCTTTGCCCTCGGACGA             | <i>HptII</i> transcript screening primers  |
| HptII-R    | ATGAAAAAGCCTGAACTCACC             |                                            |
| NAC4-RTF   | TTCTCGTAAAAGTGGTAGCTCC            | <i>GhNAC4</i> real-time PCR primers        |
| NAC4-RTR   | TCCAGTTGTGAAGAAGACGATG            |                                            |
| UBQ7-RTF   | AGAGGTCGAGTCTTCGGACA              | <i>UBQ7</i> real-time PCR primers          |
| UBQ7-RTR   | GCTTGATCTTCTTGGGCTTG              |                                            |

15

16 **Table 2**

| MOTIFS/TFs RELATED TO HORMONE RESPONSE |                 |     |         |          |                                                                        |
|----------------------------------------|-----------------|-----|---------|----------|------------------------------------------------------------------------|
| S.No                                   | MOTIF/TF NAME   | No. | DB ID   | SEQUENCE | EXPECTED FUCTION                                                       |
| 1                                      | TGA-ELEMENT     | 1   | PC      | AACGAC   | Cis acting regulatory element involved in auxin responsiveness         |
| 2                                      | GGTCCCATGM SAUR | 1   | S000360 | GGTCCCAT |                                                                        |
| 3                                      | CATATGGMSA UR   | 2   | S000370 | CATATG   |                                                                        |
| 4                                      | AUXREPSIAA4     | 1   | S000026 | KGTCCCAT | Auxin responsive element                                               |
| 2                                      | ABRERATCAL      | 7   | S000507 | MACGYGB  | ABARE related sequence, found upstream of Calcium ion responsive genes |



| 3                                            | CE3                       | 1   | PC      | GACGCGTG<br>TC       | Involved in ABA and VP1 response                                                        |
|----------------------------------------------|---------------------------|-----|---------|----------------------|-----------------------------------------------------------------------------------------|
| 4                                            | ABREOSRAB21               | 1   | S000012 | ACGTSSSC             | Motifs involved in ABA responsiveness                                                   |
| 5                                            | ABRELATERD1               | 8   | S000414 | ACGTG                |                                                                                         |
| 6                                            | CGTGT<br>SPHZMC1          | 1   | S000294 | CGTGTCGTC<br>CATGCAT |                                                                                         |
| 7                                            | ACGTABREMO<br>TIFA2OSEM   | 6   | S000394 | ACGTGKGC             | ACGT-core of motif A in ABRE                                                            |
| 8                                            | WBOXATNPR1                | 4   | S000390 | TTGAC                | Recognition site of salicylic acid (SA)-induced WRKY TFs                                |
| 9                                            | TCA ELEMENT               | 1   | PC      | GAGAAGAA<br>TA       | Involved in salicylic acid response                                                     |
| 10                                           | CPBCSPOR                  | 1   | S000491 | TATTAG               | Critical for Cytokinin-enhanced expression                                              |
| 11                                           | ARR1AT                    | 16  | S000454 | NGATT                | Binding site of ARR1, a cytokine response regulator                                     |
| 12                                           | TGACG-MOTIF               | 1   | PC      | TGACG                | Involved in jasmonate (JA) induction, plays a role in wounding response                 |
| 13                                           | T/GBOXAT<br>PIN2          | 1   | S000458 | AACGTG               |                                                                                         |
| 14                                           | PYRIMIDINEBO<br>XOSRAMY1A | 4   | S000259 | CCTTTT               |                                                                                         |
| 15                                           | CGTCA-MOTIF               | 1   | PC      | CGTCA                |                                                                                         |
| 16                                           | GADOWNAT                  | 5   | S000438 | ACGTGTC              | Motif for down-regulation of expression by GA                                           |
| 17                                           | GARE1OSREP1               | 2   | S000419 | TAACAGA              | Gibberellins-responsive element (GARE)                                                  |
| 18                                           | GAREAT                    | 4   | S000439 | TAACAAR              |                                                                                         |
| 19                                           | EIN-EIL TF                | 4   | -       | ATGCA                | Positive regulator in the ethylene response pathway                                     |
| 20                                           | BES1 TF                   | 7   | -       | CACGTG               | Key transcription factors in Brassinosteroids signaling pathway                         |
| 21                                           | AP2/ERF TF                | 3   | -       | GCCGAC               | key regulator integrating various hormone signals, also plays a role in stress response |
| <b>MOTIFS/TFs RELATED TO STRESS RESPONSE</b> |                           |     |         |                      |                                                                                         |
| S.No                                         | MOTIF/TF NAME             | No. | DB ID   | SEQUENCE             | EXPECTED FUCTION                                                                        |
| 1                                            | ANAERO1<br>CONSENSUS      | 2   | S000477 | AAACAAA              | Motifs found upstream of anaerobic induced genes                                        |
| 2                                            | UP2ATMSD                  | 2   | S000472 | AAACCCTA             | Plays a role in auxiliary bud outgrowth after stem decapitation                         |
| 3                                            | SREATMSD                  | 1   | S000470 | TTATCC               | Cis elements involved in sugar repression                                               |
| 4                                            | CGACGCOSAM<br>Y3          | 16  | S000205 | CGACG                | May function as a coupling element for the G-box motif                                  |
| 5                                            | WBOXHVIS01                | 2   | S000442 | TGACT                | SUSIBA2 bind to W-box element, plays a role in sugar                                    |

|    |                     |    |         |                    |                                                                                                                                                                                                                        |
|----|---------------------|----|---------|--------------------|------------------------------------------------------------------------------------------------------------------------------------------------------------------------------------------------------------------------|
|    |                     |    |         |                    | signaling                                                                                                                                                                                                              |
| 6  | GMHDL<br>GMVSPB     | 1  | S000372 | CATTAATTA<br>G     | Binding site of the soybean homeodomain leucine zipper proteins (GmHdl56, GmHdl57); Found in the phosphate response domain of the soybean <i>VspB</i> promoter                                                         |
| 7  | MYB2<br>CONSENSUSAT | 2  | S000409 | YAACKG             | MYB recognition site found in the promoters of the dehydration-responsive gene                                                                                                                                         |
| 8  | MYB1AT              | 4  | S000408 | WAACCA             |                                                                                                                                                                                                                        |
| 9  | HSE                 | 1  | PC      | AGAAAATT<br>CG     | Involved in heat stress responsiveness                                                                                                                                                                                 |
| 10 | C-REPEAT/DRE        | 1  | PC      | TGGCCGAC           | Essential for cold and dehydration stress response                                                                                                                                                                     |
| 11 | CBFHV               | 3  | S000497 | RYCGAC             |                                                                                                                                                                                                                        |
| 12 | DRECR<br>COREAT     | 3  | S000418 | RCCGAC             |                                                                                                                                                                                                                        |
| 13 | CSD TF              | 8  | -       | AATAAA             | Plays a role in cold shock response                                                                                                                                                                                    |
| 14 | HSF TF              | 4  | -       | CTNGAANN<br>TTCNAG | Heat shock responsive transcription factor                                                                                                                                                                             |
| 15 | C2H2 TF             | 11 | -       | ACACT              | Play diverse roles in the plant stress response and the hormone signal transduction                                                                                                                                    |
| 16 | BOXLCORE<br>DCPAL   | 1  | S000492 | ACCWWCC            | Core sequences of box-L-like sequences, involved in elicitor induction                                                                                                                                                 |
| 17 | WBOX<br>NTCHN48     | 1  | S000508 | CTGACY             | Involved in elicitor-responsive transcription of defense genes                                                                                                                                                         |
| 18 | HSRE<br>NTHSR203J   | 1  | S000466 | CAAAATTTT<br>GTA   | "HSRE (HSR203 responsive element)" responsible for the marked induction during the HR (hypersensitive response); HSR203J is specifically activated during the early steps of incompatible plant/pathogen interactions; |
| 19 | GT1GMSCAM4          | 6  | S000453 | GAAAAA             | Plays a role in pathogen- and salt-induced gene expression                                                                                                                                                             |
| 20 | TC- RICH<br>REPEATS | 1  | PC      | GTTTTCTTA<br>C     | Involved in defense and stress response                                                                                                                                                                                |
| 21 | BIHD1OS             | 6  | S000498 | TGTCA              | Binding site of BELL homeodomain transcription factor, known to play a role in disease response                                                                                                                        |
| 22 | WBOXNTERF3          | 4  | S000457 | TGACY              | W-box, May be involved in activation by wounding                                                                                                                                                                       |
| 23 | WBOX<br>PCWRKY1     | 2  | S000310 | TTTGACY            | W-box, binding site of WRKY TFs                                                                                                                                                                                        |

| 24                                                        | MYB1LEPR             | 1   | S000443 | GTTAGTT       | MYB TF binding site                                                                                                                 |
|-----------------------------------------------------------|----------------------|-----|---------|---------------|-------------------------------------------------------------------------------------------------------------------------------------|
| 25                                                        | ACGTTBOX             | 2   | S000132 | AACGTT        | Binding site of bZIP TFs                                                                                                            |
| <b>MOTIFS/TFs RELATED TO TISSUE SPECIFIC LOCALIZATION</b> |                      |     |         |               |                                                                                                                                     |
| S.No                                                      | MOTIF/TF NAME        | No. | DB ID   | SEQUENCE      | EXPECTED FUCTION                                                                                                                    |
| 1                                                         | SEF1MOTIF            | 3   | S00006  | ATATTTAW<br>W | Motifs required for seed specific expression                                                                                        |
| 2                                                         | SEF3MOTIFGM          | 1   | S000115 | AACCCA        |                                                                                                                                     |
| 3                                                         | SEF4MOTIFGM<br>7S    | 12  | S000103 | RTTTTTR       |                                                                                                                                     |
| 4                                                         | CANBNNAPA            | 1   | S000148 | CNAACAC       | Required for seed specificity                                                                                                       |
| 5                                                         | TALE TF              | 12  | -       | TGAC          | Plays a role in meristem function; Involved in maintaining cells in an undifferentiated, meristematic state                         |
| 6                                                         | ROOTMOTIF<br>TAPOX1  | 11  | S000098 | ATATT         | Motif found both in promoters of <i>roLD</i>                                                                                        |
| 7                                                         | OSE1ROOT<br>NODULE   | 1   | S000467 | AAAGAT        | Consensus sequence motifs of organ-specific elements (OSE) characteristic of infected cells of root nodules                         |
| 8                                                         | OSE2ROOT<br>NODULE   | 10  | S000468 | CTCTT         |                                                                                                                                     |
| 9                                                         | TELOBOX<br>ATEEF1AA1 | 1   | S000309 | AAACCCTA<br>A | Required for expression in the root                                                                                                 |
| 10                                                        | RHERPATEXPA<br>7     | 3   | S000512 | KCACGW        | Right part of Root Hair-specific cis-Element                                                                                        |
| 11                                                        | MYBST1               | 2   | S000180 | GGATA         | Core motif of MybSt1 (a potato MYB homolog) binding site.                                                                           |
| 12                                                        | CACTFTPPCA1          | 22  | S000449 | YACT          | Tetranucleotide (CACT) is a key component of Mem1 (mesophyll expression module 1)                                                   |
| 13                                                        | DOFCOREZM            | 26  | S000265 | AAAG          | Core site required for binding of Dof proteins; involved in regulation of carbon metabolism                                         |
| 14                                                        | MYBPZM               | 1   | S000179 | CCWACC        | Core of consensus maize P (myb homolog) binding site and specifies red pigmentation of kernel pericarp, cob, and other floral organ |
| 15                                                        | SBP TF               | 8   | -       | CGTAC         | Plays a role in flower and fruit development as well as other physiological processes                                               |
| 16                                                        | TCR TF               | 12  | -       | -             | Plays a role in development of both male and female reproductive tissues                                                            |
| 17                                                        | CARGCW8GAT           | 6   | S000431 | CWWWWW        | Binding site for AGL15                                                                                                              |

|                                             |                        |     |         | WWWG               | (AGAMOUS-like 15)                                                                                                     |
|---------------------------------------------|------------------------|-----|---------|--------------------|-----------------------------------------------------------------------------------------------------------------------|
| 18                                          | TGTCACACMC<br>UCUMISIN | 4   | S000422 | TGTCACA            | Enhancer element necessary for fruit-specific expression                                                              |
| 19                                          | AT hook TF             | 50  | -       | AAAAT              | Known to play a role in vascular specific expression                                                                  |
| 20                                          | POLLEN1<br>LELAT52     | 9   | S000245 | AGAAA              | One of two co-dependent regulatory elements responsible for pollen specific activation                                |
| 21                                          | GTGANTG10              | 13  | S000378 | GTGA               | "GTGA motif"; plays a role in pollen specific expression                                                              |
| 22                                          | TAAAGSTKST1            | 5   | S000387 | TAAAG              | Target site for Dof1 TF controlling guard cell-specific gene expression                                               |
| 23                                          | WOX TF                 | 5   | -       | TTAAT              | Involved in several key developmental processes                                                                       |
| <b>MOTIFS/TFs RELATED TO LIGHT RESPONSE</b> |                        |     |         |                    |                                                                                                                       |
| S.No                                        | MOTIF/TF NAME          | No. | DB ID   | SEQUENCE           | EXPECTED FUNCTION                                                                                                     |
| 1                                           | GATA MOTIF             | 1   | PC      | GATAGGA            | Part of a module for light response, Also plays a role in vascular specific expression                                |
| 2                                           | GATA TF                | 42  | -       | GATA               | Part of a module for light response,                                                                                  |
| 3                                           | IBOXCORENT             | 3   | S000424 | GATAAGR            | Conserved sequence upstream of light regulated genes                                                                  |
| 4                                           | IBOX                   | 3   | S000124 | GATAAG             |                                                                                                                       |
| 5                                           | IBOXCORE               | 11  | S000199 | GATAA              |                                                                                                                       |
| 6                                           | GT1<br>CONSENSUS       | 23  | S000198 | GRWAAW             | Plays a role in light regulation; Consensus GT-1 binding site, can activate and stabilize the transcription machinery |
| 7                                           | SORLIP1AT              | 1   | S000483 | GGGCC              | Cis acting elements involved in the phytochrome A regulated gene expression                                           |
| 8                                           | SORLIP2AT              | 2   | S000482 | GCCAC              |                                                                                                                       |
| 9                                           | TBOX<br>ATGAPB         | 1   | S000383 | ACTTTG             | Involved in light activated transcription                                                                             |
| 10                                          | 3-AF1                  | 1   | PC      | AAGAGATA<br>TTT    | Light responsive element                                                                                              |
| 11                                          | ACE                    | 1   | PC      | AAAACGTT<br>TA     | Part of a module for light response                                                                                   |
| 12                                          | AE-BOX                 | 1   | PC      | AGAAACAA           |                                                                                                                       |
| 13                                          | AT-1                   | 1   | PC      | AATTATTTT<br>TTATT |                                                                                                                       |
| 14                                          | ATC MOTIF              | 1   | PC      | AGTAATCT           |                                                                                                                       |
| 15                                          | AT-C                   | 1   | PC      | AATTATTTT<br>TTATT |                                                                                                                       |
| 16                                          | RBCS<br>CONSENSUS      | 1   | S000127 | AATCCAA            | rbcS general consensus sequence                                                                                       |
| 17                                          | -10PEHVPSBD            | 2   | S000392 | TATTCT             | -10 promoter element, involved                                                                                        |

|                                                                        |                     |     |         |                                  | in chloroplast expression                                                                                                                                     |
|------------------------------------------------------------------------|---------------------|-----|---------|----------------------------------|---------------------------------------------------------------------------------------------------------------------------------------------------------------|
| 18                                                                     | BOXIINTPATPB        |     | S000296 | ATAGAA                           | Conserved sequence found in the promoters of plastid genes                                                                                                    |
| 19                                                                     | PRECONSCRHSP<br>70A |     | S000506 | SCGAYNRN<br>NNNNNNNN<br>NNNNNNHD | Consensus sequence of plastid response element (PRE) in the promoters of HSP70A                                                                               |
| <b>MOTIFS/TFs RELATED TO CELL CYCLE</b>                                |                     |     |         |                                  |                                                                                                                                                               |
| S.No                                                                   | MOTIF/TF<br>NAME    | No. | DB ID   | SEQUENCE                         | EXPECTED FUCTION                                                                                                                                              |
| 1                                                                      | E2F<br>CONSENSUS    | 6   | S000476 | WTTSSCSS                         | Motifs involved in gene expression induction at the G1/S transition of the cell cycle in actively dividing cells                                              |
| 2                                                                      | CELLCYCLESC         | 1   | S000031 | CACGAAAA                         |                                                                                                                                                               |
| 3                                                                      | MYBCORE<br>ATCYCB1  | 1   | S000502 | AACGG                            | Myb core" in the 18 bp sequence which is able to activate expression without leading to M-phase-specific expression                                           |
| 4                                                                      | MARARS              | 4   | S000064 | WTTTATRRT<br>TW                  | Motifs found in SAR (scaffold attachment region); or matrix attachment region, (MAR)                                                                          |
| 5                                                                      | MARTBOX             | 6   | S000067 | TTWTWTTW<br>TT                   |                                                                                                                                                               |
| 6                                                                      | MARABOX1            | 4   | S000063 | AATAAAYA<br>AA                   |                                                                                                                                                               |
| <b>MOTIFS/TFs RELATED TO BASIC TRANSCRIPTION AND EXPRESSION LEVELS</b> |                     |     |         |                                  |                                                                                                                                                               |
| S.No                                                                   | MOTIF/TF<br>NAME    | No. | DB ID   | SEQUENCE                         | EXPECTED FUCTION                                                                                                                                              |
| 1                                                                      | CAATBOX1            | 19  | S000028 | CAAT                             | Common cis element in promoter and enhancer regions                                                                                                           |
| 2                                                                      | TATABOX<br>OSPAL    | 4   | S000400 | TATTTAA                          | Binding site of TATA binding protein (TBP); for essential for accurate initiation of transcription and synergistic enhancement of transcription               |
| 3                                                                      | TATABOX3            | 2   | S000110 | TATTAAT                          |                                                                                                                                                               |
| 4                                                                      | TATABOX4            | 1   | S000111 | TATATAA                          |                                                                                                                                                               |
| 5                                                                      | TATABOX2            | 2   | S000109 | TATAAAT                          |                                                                                                                                                               |
| 6                                                                      | TATA BOX            | 5   | PC      | TATA                             |                                                                                                                                                               |
| 7                                                                      | POLASIG3            | 3   | S000088 | AATAAT                           |                                                                                                                                                               |
| 8                                                                      | MRNA<br>STA1CRPSBD  | 1   | S000274 | CUCUUTGU<br>TTUU                 | mRNA stability determinant; Required for the stable accumulation                                                                                              |
| 9                                                                      | NF-Y TF             | 5   | -       | CCAAT                            | Component of the NF-Y/HAP tf complex. The NF-Y complex stimulates the transcription of various genes by recognizing and binding to a CCAAT motif in promoters |
| 10                                                                     | CTRM<br>CAMV35S     | 1   | S000405 | TCTCTCTCT                        | Cis acting element conferring high transcription levels                                                                                                       |
| 11                                                                     | 5'UTR-              | 1   | PC      | TTTCTTCTC                        |                                                                                                                                                               |

|                                | PYRIMIDINE STRETCH |     |         | T            |                                                                                                                                       |
|--------------------------------|--------------------|-----|---------|--------------|---------------------------------------------------------------------------------------------------------------------------------------|
| 12                             | QARBNEXTA          | 1   | S000244 | AACGTGT      |                                                                                                                                       |
| 13                             | QELEMENT ZMZM13    | 2   | S000254 | AGGTCA       |                                                                                                                                       |
| 14                             | ECCRCAH1           | 1   | S000494 | GANTTNC      |                                                                                                                                       |
| 15                             | RE1ASPHYA3         | 2   | S000195 | CATGGGCG CGG | RE1 (putative repressor element)                                                                                                      |
| <b>OTHER TFs BINDING SITES</b> |                    |     |         |              |                                                                                                                                       |
| S.No                           | MOTIF/TF NAME      | No. | DB ID   | SEQUENCE     | EXPECTED FUCTION                                                                                                                      |
| 1                              | NAC/NAM TF         | 2   | -       | CGTR         | Plays a role in developmental process and stress responses                                                                            |
| 2                              | TCP TF             | 6   | -       | GGCCCAW W    | Plays a pivotal role in shaping plant morphology and also plays a role in synthesis of bioactive compounds                            |
| 3                              | STOREKEEPER TF     | 3   | -       | GGTCG        | Plays a role in sucrose inducible expression of patatin gene                                                                          |
| 4                              | GRAS TF            | 1   | -       | GTACGG       | Play a role in various processes like GA signaling, root radial patterning and floral development                                     |
| 5                              | DOF TF             | 19  | -       | AAAG         | Known to play a role in seed development, photoperiodic flowering, photosynthesis, stress tolerance and cell-specific gene expression |
| 6                              | MYB/SANT TF        | 43  | -       | AGATATTT     | Play diverse role in developmental and physiological processes, hormone response and stress tolerance                                 |
| 7                              | bHLH TF            | 32  | -       | CANNTG       | Known to play many different functions in essential physiological and developmental process                                           |
| 8                              | ZF-HD TF           | 36  | -       | ATTAT        | Plays an important role in developmental processes and stress responses                                                               |
| 9                              | WRKY TF            | 4   | -       | GTCAA        | Forms an integral parts of signaling webs that modulate many plant processes                                                          |
| 10                             | bZIP TF            | 2   | -       | ACGT CORE    | Play diverse role in developmental and physiological processes                                                                        |

1

2 **Legends to figures:**

3 **Fig. 1**



1 Expression patterns of *GhNAC4* transcript in response to various phytohormones. qRT-PCR expression analysis of  
2 the *GhNAC4* gene in *G. hirsutum* leaves after ABA, MeJA, SA, 6-BAP, GA<sub>3</sub>, IAA, or Ethephon treatment. Two  
3 weeks-old cotton seedlings incubated for 24 h under the treatment, were used for analysis. mRNA levels of  
4 *GhNAC4* gene were normalized to that of Ubiquitin gene, *GhUBQ7*. The data are shown as the means  $\pm$  SE (n=3).  
5 A statistical analysis with one-way ANOVA indicates significant differences (\*\* P<0.01, \*\*\* P<0.001, ns - not  
6 significant)

7 **Fig. 2**

8 Expression patterns of *GhNAC4* transcript in response to various environmental stresses. qRT-PCR expression  
9 analysis of the *GhNAC4* gene in *G. hirsutum* leaves after NaCl, mannitol, PEG, methyl viologen, high temperature,  
10 air drying, submergence, wounding, dark or combination of dark and cold treatment. Two weeks-old cotton  
11 seedlings were used for analysis. mRNA levels of *GhNAC4* gene were normalized to that of Ubiquitin gene,  
12 *GhUBQ7*. The data are shown as the means  $\pm$  SE (n=3). A statistical analysis with one-way ANOVA indicates  
13 significant differences (\*\*\* P<0.001, ns - not significant)

14 **Fig. 3**

15 Physical map of *GhNAC4* promoter. Nucleotide sequence of the 1492 bp upstream region of *GhNAC4* gene from *G.*  
16 *hirsutum* var JK Durga. The putative transcription start site is in bold and is designated as +1. The translation start  
17 site is bolded and underlined. The numbers on the left side indicate the distance from the transcription start site. The  
18 sequence was analyzed by PLACE, PlantCARE and PlantPAN2.0 programs. All the predicted motifs are indicated by  
19 arrow and their names are mentioned above. '→' and '←' indicates that the predicted motif is on positive (5'-3')  
20 and negative (3'-5') strand respectively. Stress inducible motifs are represented in red, phytohormone responsive  
21 motifs are in green, light inducible motifs are in orange, tissue specificity motifs are in blue, transcriptional related  
22 motifs in purple and transcription factors binding sites are in teal color

23 **Fig. 4**

24 Functional classification of *cis*-elements present in the *GhNAC4* promoter. The motifs in the *GhNAC4* promoter  
25 were classified into five functional categories. There are a relatively high proportion of tissue-specific motifs and  
26 transcription factors binding sites.

27 **Fig. 5**

28 Histochemical localization of GUS activity in tobacco transgenic plants containing PRO<sub>*GhNAC4*</sub>:GUS construct. **a-e**  
29 seedlings grown on MS media with hygromycin at - **a** Day1; **b** Day 3; **c** Day 7; **d** Day 15; **e** Day 30. **f-j** various  
30 tissues of a 30-day old transgenic tobacco plant - **f** Main root; **g** Lateral root; **h** True leaf; **i** Guard cells; **j** Developing  
31 leaf. **k-m** floral structures - **k** Mature flower; **l** dissected flower showing various tissues; **m** cross-section of an  
32 anther. **n** 15 days old tobacco seedling carrying empty pCAMBIA 1381Z vector. AW, anther wall; CO, cotyledon;  
33 GC, guard cell; HY, hypocotyl; LR, lateral root; LRJ, lateral root junction; LV, lateral vein; OV, ovary; PD, pedicel;  
34 PE, petal; PG, pollen grains; PL, plumule; RAM, root apical meristem; RD, radicle; RH, root hairs; SAM, shoot  
35 apical meristem; SE, sepal; TL, true leaf; VB, vascular bundle; WA, wounded area. All arrows show strong GUS  
36 activity or no activity. Bars of each panel are as shown

37 **Fig. 6**

1 GUS activity in free hand cross-sections tobacco transgenic plants containing PRO<sub>GhNAC4</sub>:GUS construct. **a** leaf; **b**  
2 petiole; **c** stem **d** magnified view of the stem; **e** root; **f** wounded stem. abP, abaxial phloem; adP, adaxial phloem;  
3 CO, cortex; P, phloem; VB, vascular bundle; XY, xylem. All arrows show strong GUS activity or no activity. Bars  
4 of each panel are as shown

5 **Fig. 7**

6 Effect of various phytohormones on the GUS activity of PRO<sub>GhNAC4</sub>:GUS tobacco transgenics. Fluorometric analysis  
7 of the *GUS* gene in tobacco seedlings after ABA, MeJA, SA, 6-BAP, GA<sub>3</sub>, IAA, or Ethephon treatment. Two  
8 weeks-old PRO<sub>GhNAC4</sub>:GUS tobacco transgenic seedlings incubated for 24 h under the treatment, were used for  
9 analysis. pCAMBIA 1381Z empty vector harboring tobacco seedlings were used as a negative control. The data are  
10 shown as the means ± SE (n=3). A statistical analysis with one-way ANOVA indicates significant differences (\*\*\*)  
11 P<0.001, ns - not significant)

12 **Fig. 8**

13 Effect of various stresses on the GUS activity of PRO<sub>GhNAC4</sub>:GUS tobacco transgenics. Fluorometric analysis of the  
14 *GUS* gene in tobacco seedlings after NaCl, mannitol, PEG, methyl viologen, high temperature, air drying,  
15 submergence, wounding, dark or combination of dark and cold treatment. Two weeks-old PRO<sub>GhNAC4</sub>:GUS tobacco  
16 transgenic seedlings, were used for analysis. The data are shown as the means ± SE (n=3). A statistical analysis with  
17 one-way ANOVA indicates significant differences (\* P<0.05, \*\* P<0.01, \*\*\* P<0.001)

18 **TABLE 1**

19 Primer sequences used in the experiments. Underlined sequences are restriction enzyme recognition site

20 **TABLE 2**

21 Putative motifs in the *GhNAC4* promoter identified by in silico analysis. DB ID represents the PLACE database  
22 accession number. PC represents the motifs identified by PlantCare database

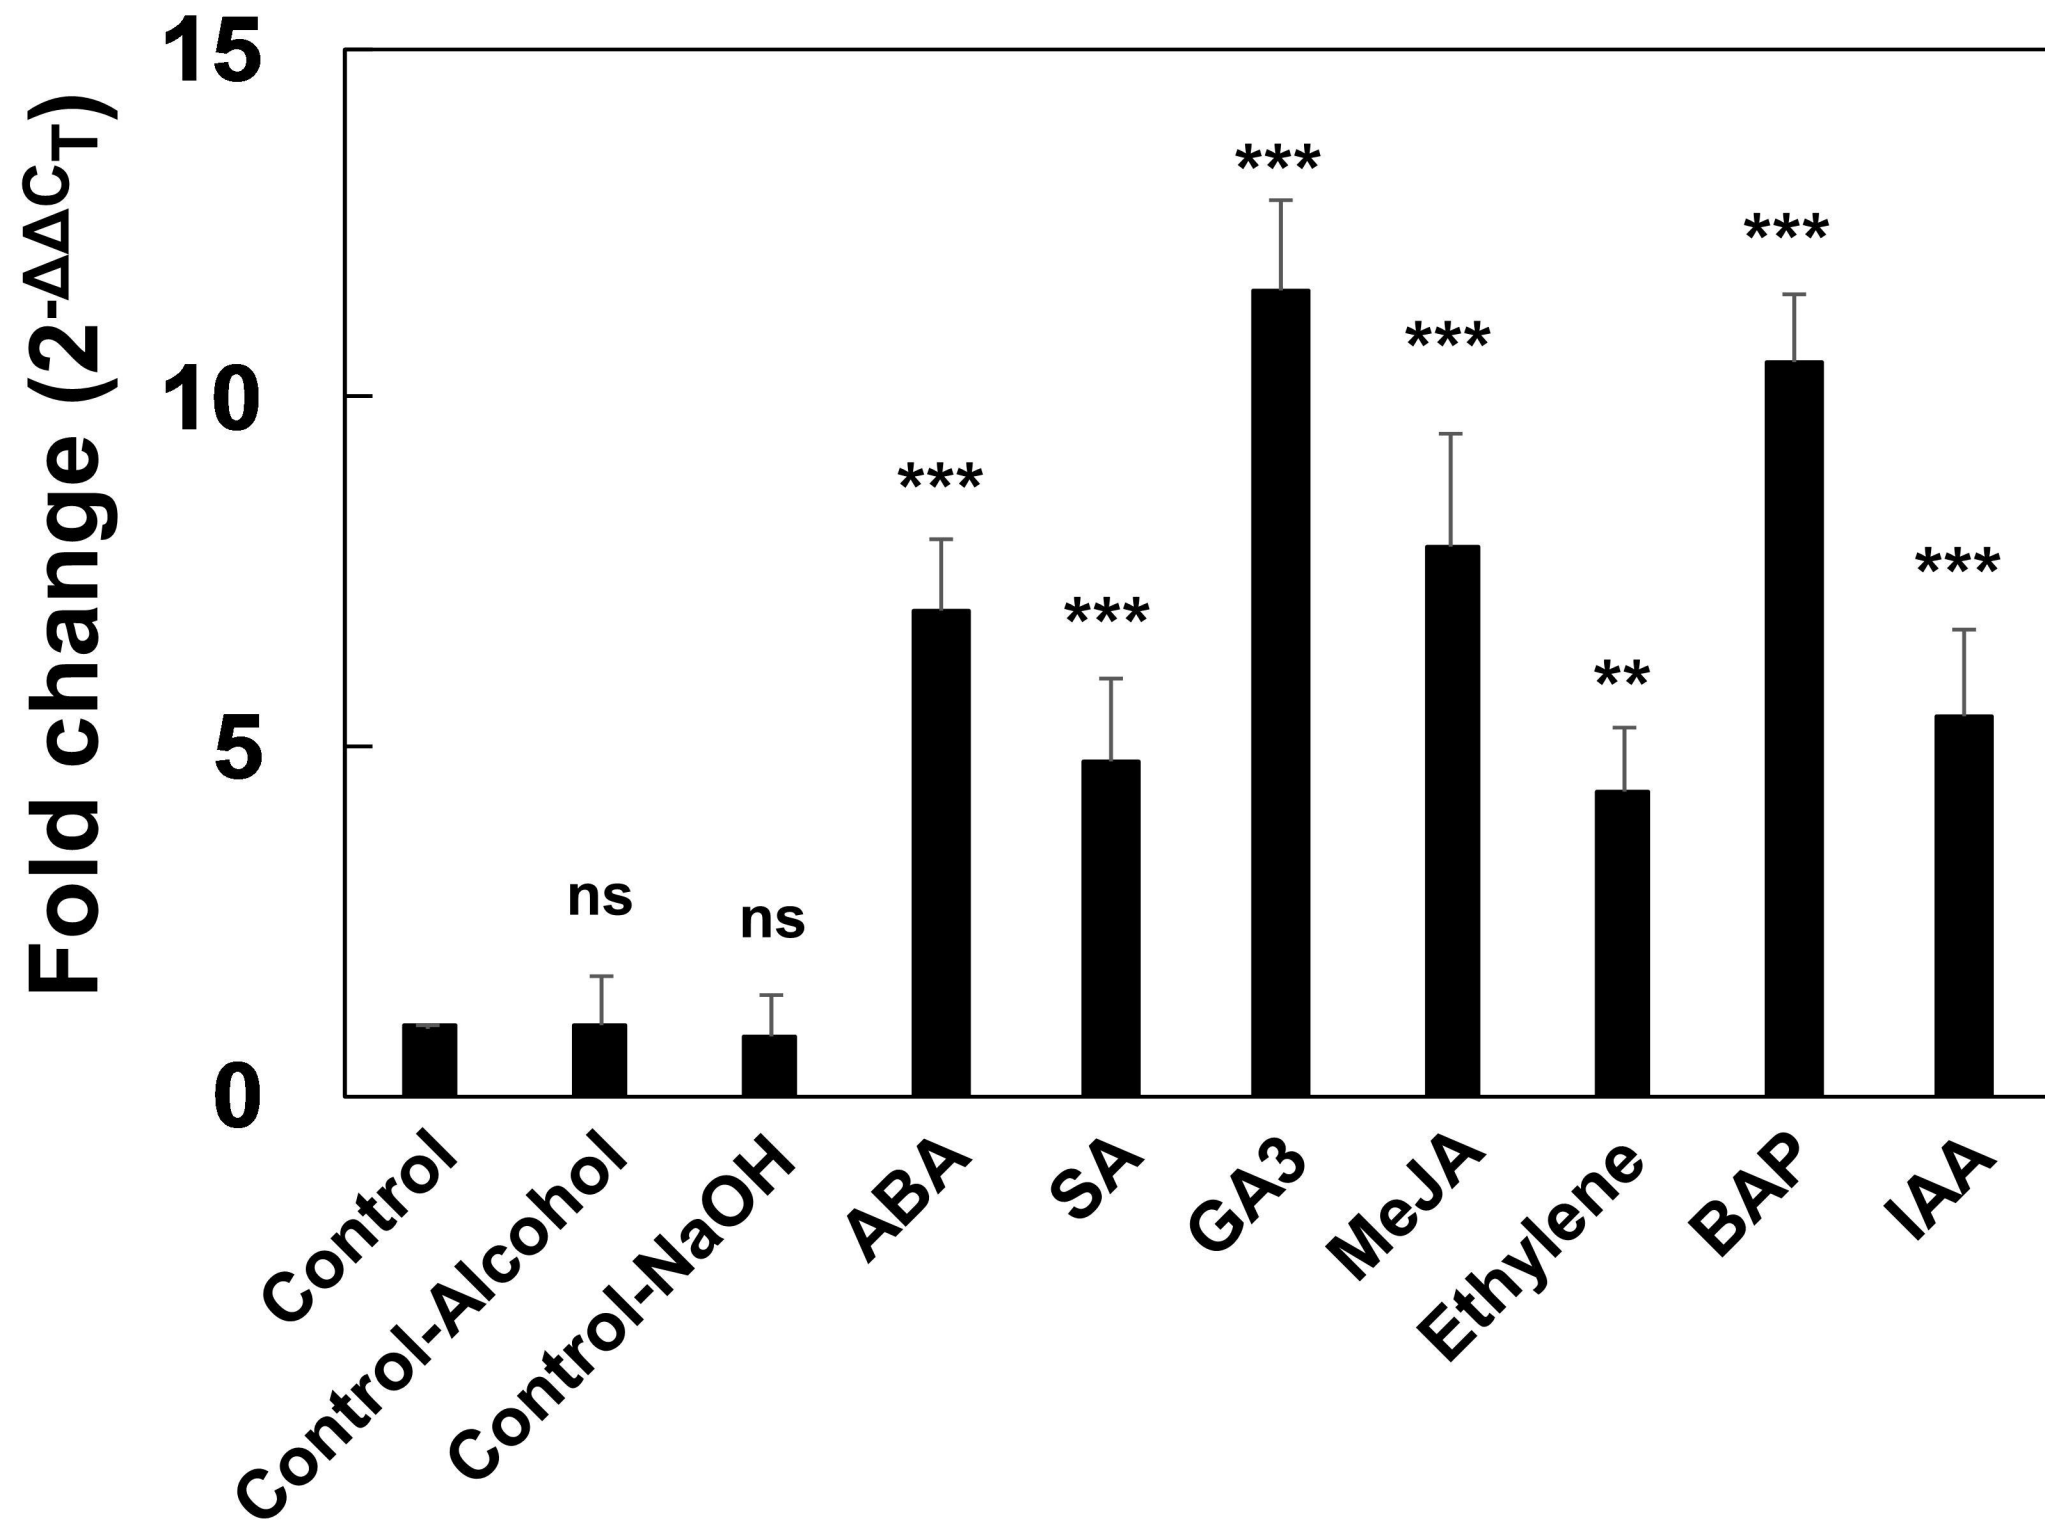

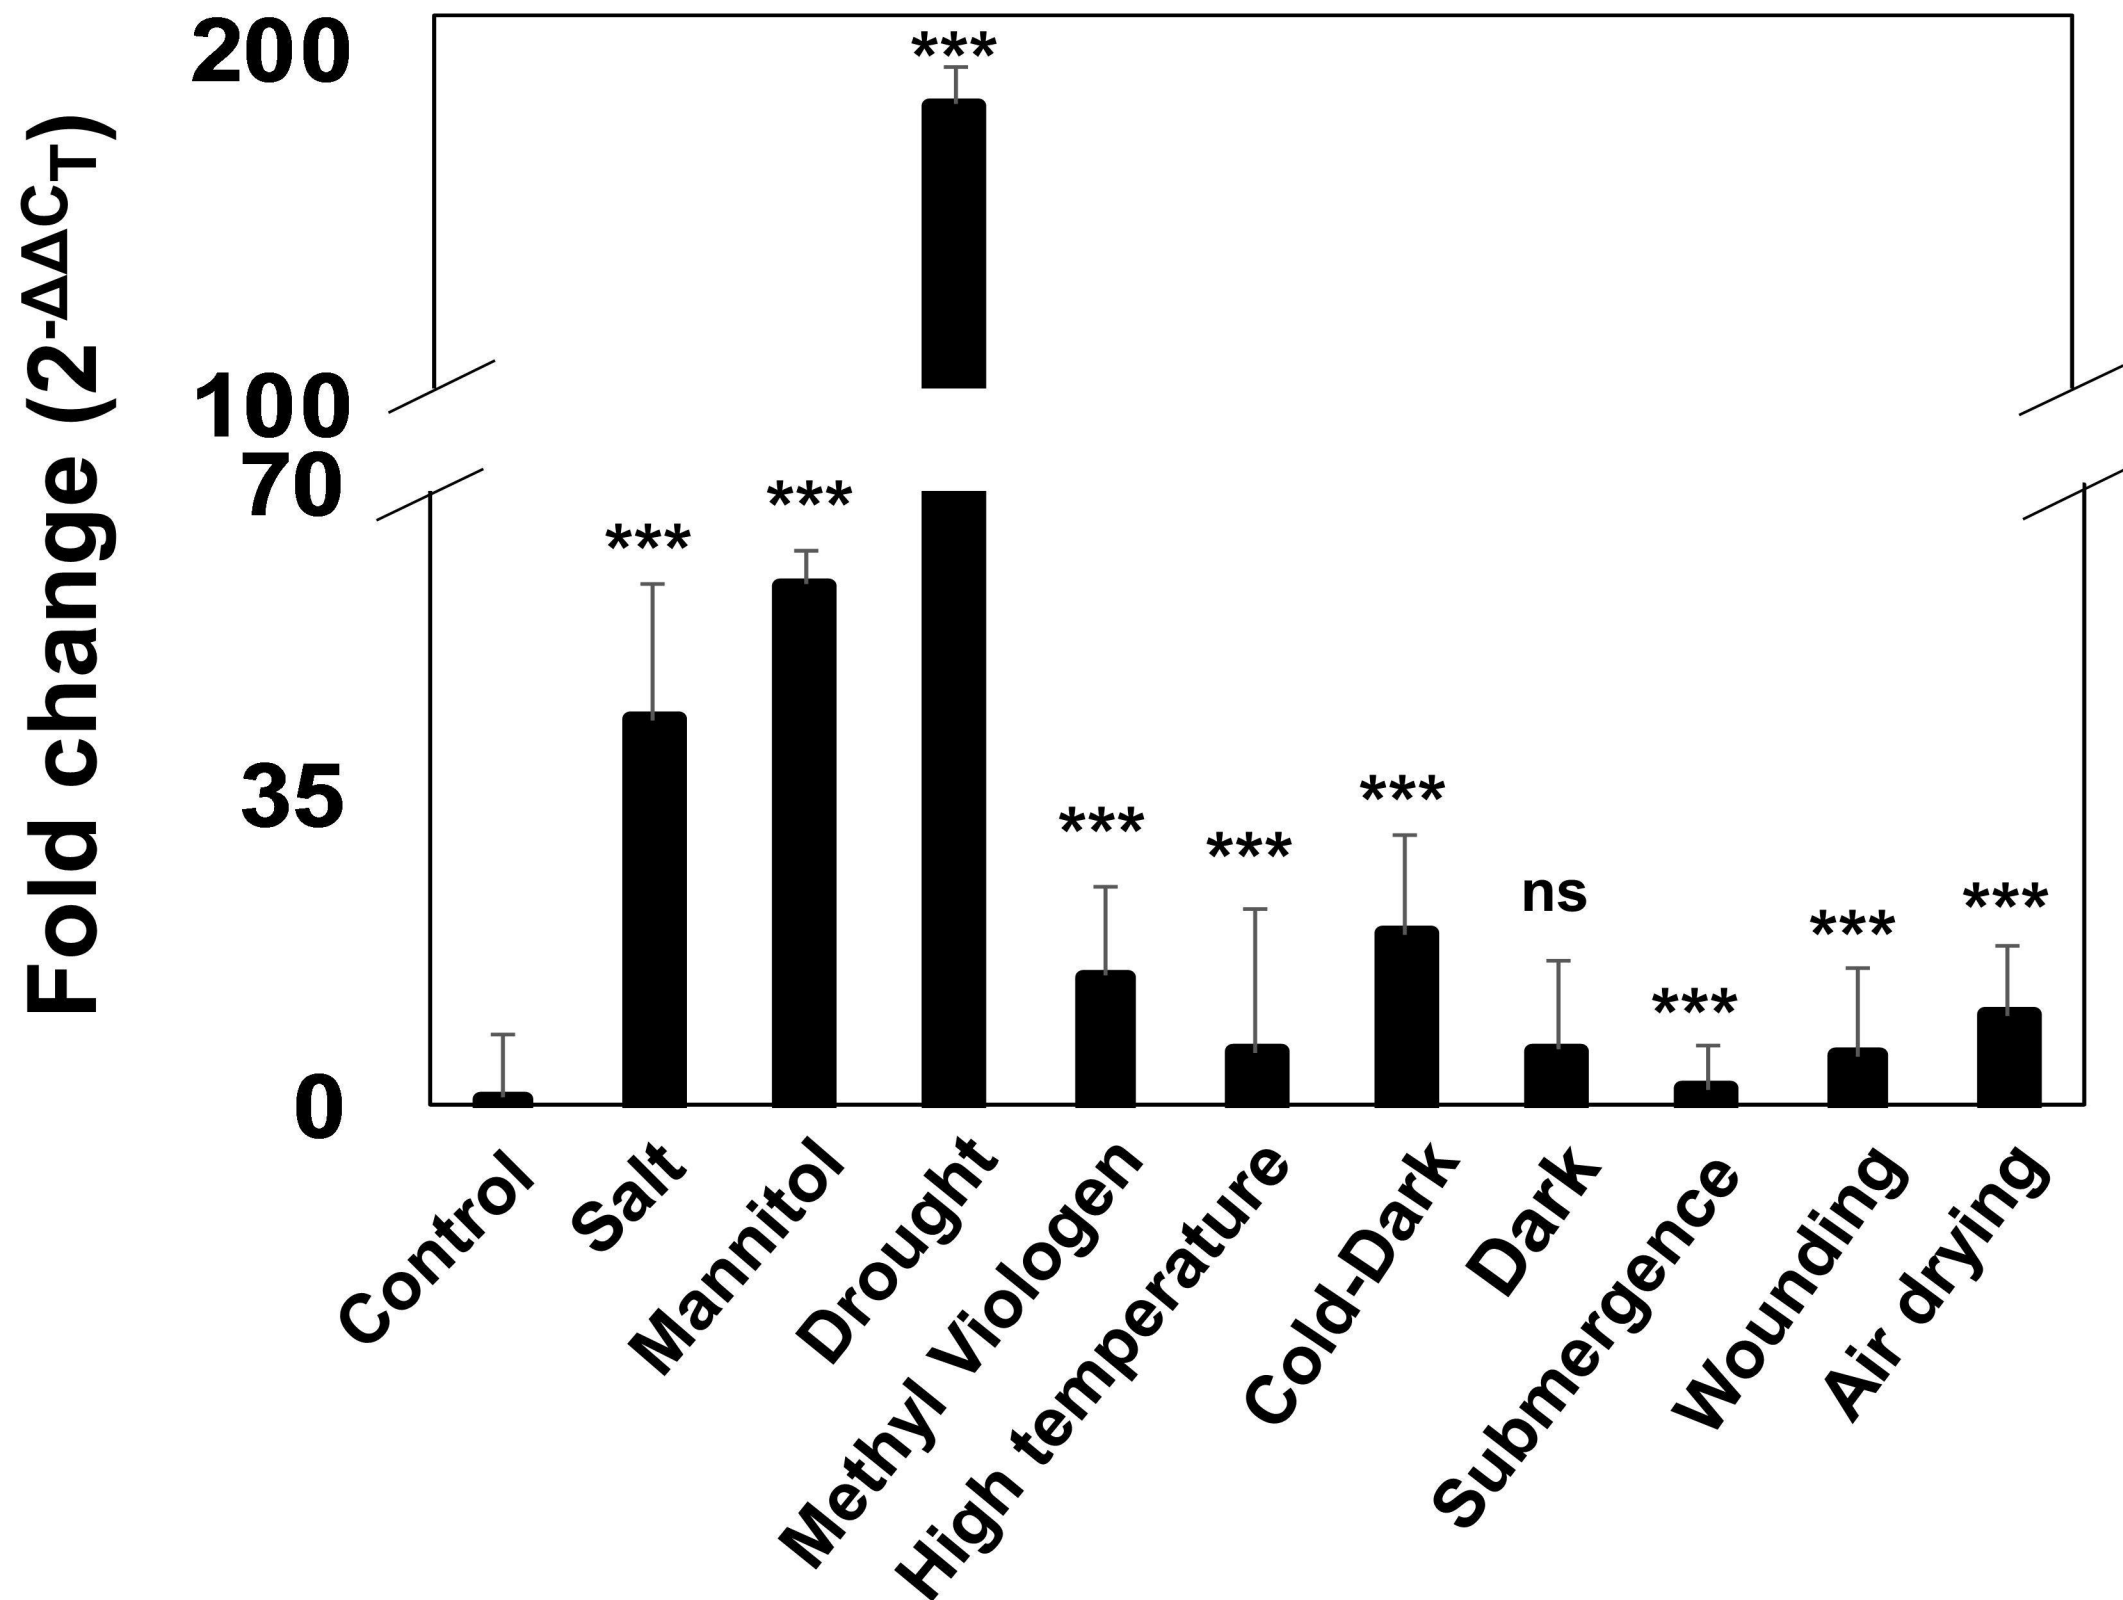

bioRxiv preprint doi: <https://doi.org/10.1101/510578>; this version posted January 7, 2019. The copyright holder for this preprint (which was not certified by peer review) is the author/funder, who has granted bioRxiv a license to display the preprint in perpetuity. It is made available under aCC-BY-NC-ND 4.0 International license.

MYB2CONSENSUSAT  
 GTGANTG10  
 IBOX CORE  
 SEF4MOTIF GM7S  
 DOFCOREZM  
 SEF1MOTIF  
 -1492 GGCCTCATAATTGCATCACCGTTGAAATCACAAAGATAAGTTTTTGTCTTTTGTATTATCTATATTTAA  
 GT1  
 CONSENSUS  
 OSE2ROOT  
 NODULE  
 POLLEN1  
 LEALAT52  
 -1422 AATTGAAAATAAAAATTGAGTTTAAAATTTTTAGTCTTGATTGATAATAAGAAAATTATATGTAGATT  
 CTCTTCGAATTTTATTTGATTTAACCTTCACATTAGTAGGTTATTGAATTGTTATAATAGATGCCGATA  
 ARR1AT  
 BOXII  
 NTPATPB  
 GT1GM  
 SCAM4  
 MARTBOX  
 TCA ELEMENT  
 -1282 ATGGCAATAGAATGAACGAAAAATAAGAAAAATAAAAACACACAAAAACCACGGAAGAGGAGAAGAAAA  
 ANAERO1  
 CONSENSUS  
 TAAAG  
 STKST1  
 -1212 CAAATCTGAAATACAAATAAAGAGCGCTTCGACTAATTAAGATTAAAAAACCTA  
 ROOTMOTIF  
 TAPOX1  
 C2H2 TFBS  
 SORLIP2AT  
 -1142 TTCTAATTAATCAATAAAAATAAGTGTAGTTTATACAGATTCTACTTATGTGGCCCTCAACCTCTTG  
 E2F  
 CONSENSUS  
 GAREAT  
 TALE  
 TFBS  
 -1072 TCCCCACATATCTCTTATTTGCCACTGTATTTATTTATTTTAAACAAGTGATAGGATTAGGTCACACA  
 CPBCSPOR  
 -1002 AACTCTAACATGAGCAATTAATAAAATCATTCTAATTTAATTCTAAAACCATTCGAATAAAAGAAGCTA  
 PYRIMIDINEBOX  
 OSRAMY1A  
 ZF-HD  
 TFBS  
 -932 AATAAAGGGGAAAATATTTGATATATTGCTAATGTAGTTTTTAGACTTCACAAGTATTAATGAATTTATA  
 GATA  
 TFBS  
 -862 AGTGTCCAATATAAATATAGTAAGATATTAATAAATAAATAAATATTTTAAAAATGTGATAATTTGTTA  
 CACTF  
 PPCA1  
 POLASIG3  
 -792 AGATTACTTATGAAATAAATAAATAACTACTACAAAATACATGATACTAACCATAAAAAATAATAGAA  
 WBOXATNPR1  
 DOF TFBS  
 WBOXNTERF3  
 NAC TFBS  
 CARGCW8GAT  
 -722 TATAATTCCTTTGACAAAAAAGCAAAAACCTTGACCTATATAATAAATAATCAATCAAATTCATTATT  
 TGTCACAM  
 CUCUMISIN  
 EIN TFBS  
 -653 TTGAATGTGTGACACATCAATTGAATAAATGGTCCAAAACCTCCATGAATGCATTAAAACCTTGTAAGCTAG  
 TCR TFBS  
 -582 TTCGTAGAAGTTATTGAGTGAAAGAAACCCTAATCCCAAACATTTAAATCAACGAAAATGAAAATCCAAC  
 WBOX  
 HVIS01  
 GADOWNAT  
 ABRERATCAL  
 -512 AAATAAAAAAAAAAGTCAATTAACGTTGTCACGAGTCACAACCAGCCAATTGTTTTTATTTCCTTTTT  
 ABARE  
 LATERD1  
 CGACG  
 OSAMY3  
 -442 ACCCTCATCATTCCCCTTTACTTTAATTTCCACAAAATTCTAGCCTAACTCTTCCACACGTGTTGGCCGA  
 HSE  
 ACGTTBOX  
 QARBNEXTA  
 AT-HOOK  
 TFBS  
 MARAS  
 -372 CGTGCCTCCCTTCTTTCAAGGCATGATAAACGTTAAACTCTCCAATAAAAAATTAATAAATAAATAAACA  
 MYB/SANT TFBS  
 -302 AAGGACAAAAGCTCCAAACTCCATAATTTTTTTTATTGCCTTACAGAATTTGGGGGAGATTCTAGAAACA  
 CAATBOX  
 ACGTABRE  
 MOTIFA20SEM  
 TGACG  
 MOTIF  
 -232 AAGCAAGAAAATTGACACGTGTCCTAAAACCTTTATGACACTCTTTTGTAAATTTTCGTGACGGTTCA  
 DRECR  
 COREAT  
 BIHD10S  
 TCA ELEMENT  
 MYBCORE  
 ATCYCB1  
 -162 TGTACCCTGTTTGGTAGGATAAGGTCGGCCGTAGATGTCAGGCACGTGTCGTTAGTTAACGGTGATAAAG  
 TATABOX  
 OSPAL  
 +1  
 -92 TGGGTCCCCTTAGACAAAAGTTAGACAAGGACGACCGTACTTATCTTTTTAGACACTATCGATCTAT  
 -22 CCTCCCTTCTATTTAAATACCTTCCCTTTCCCTAACCTGAAAAAAAAGAGAGAGAAAAACCTTTTTT  
 +49 TACTGTGTTTTATTTCTCTTGACTAAAACCTGTTTGGTCGGCAAGAAAACCTTTAGAATCATGGGAGTGC  
 +119 CGATGGGAGTGCCGGAAACT



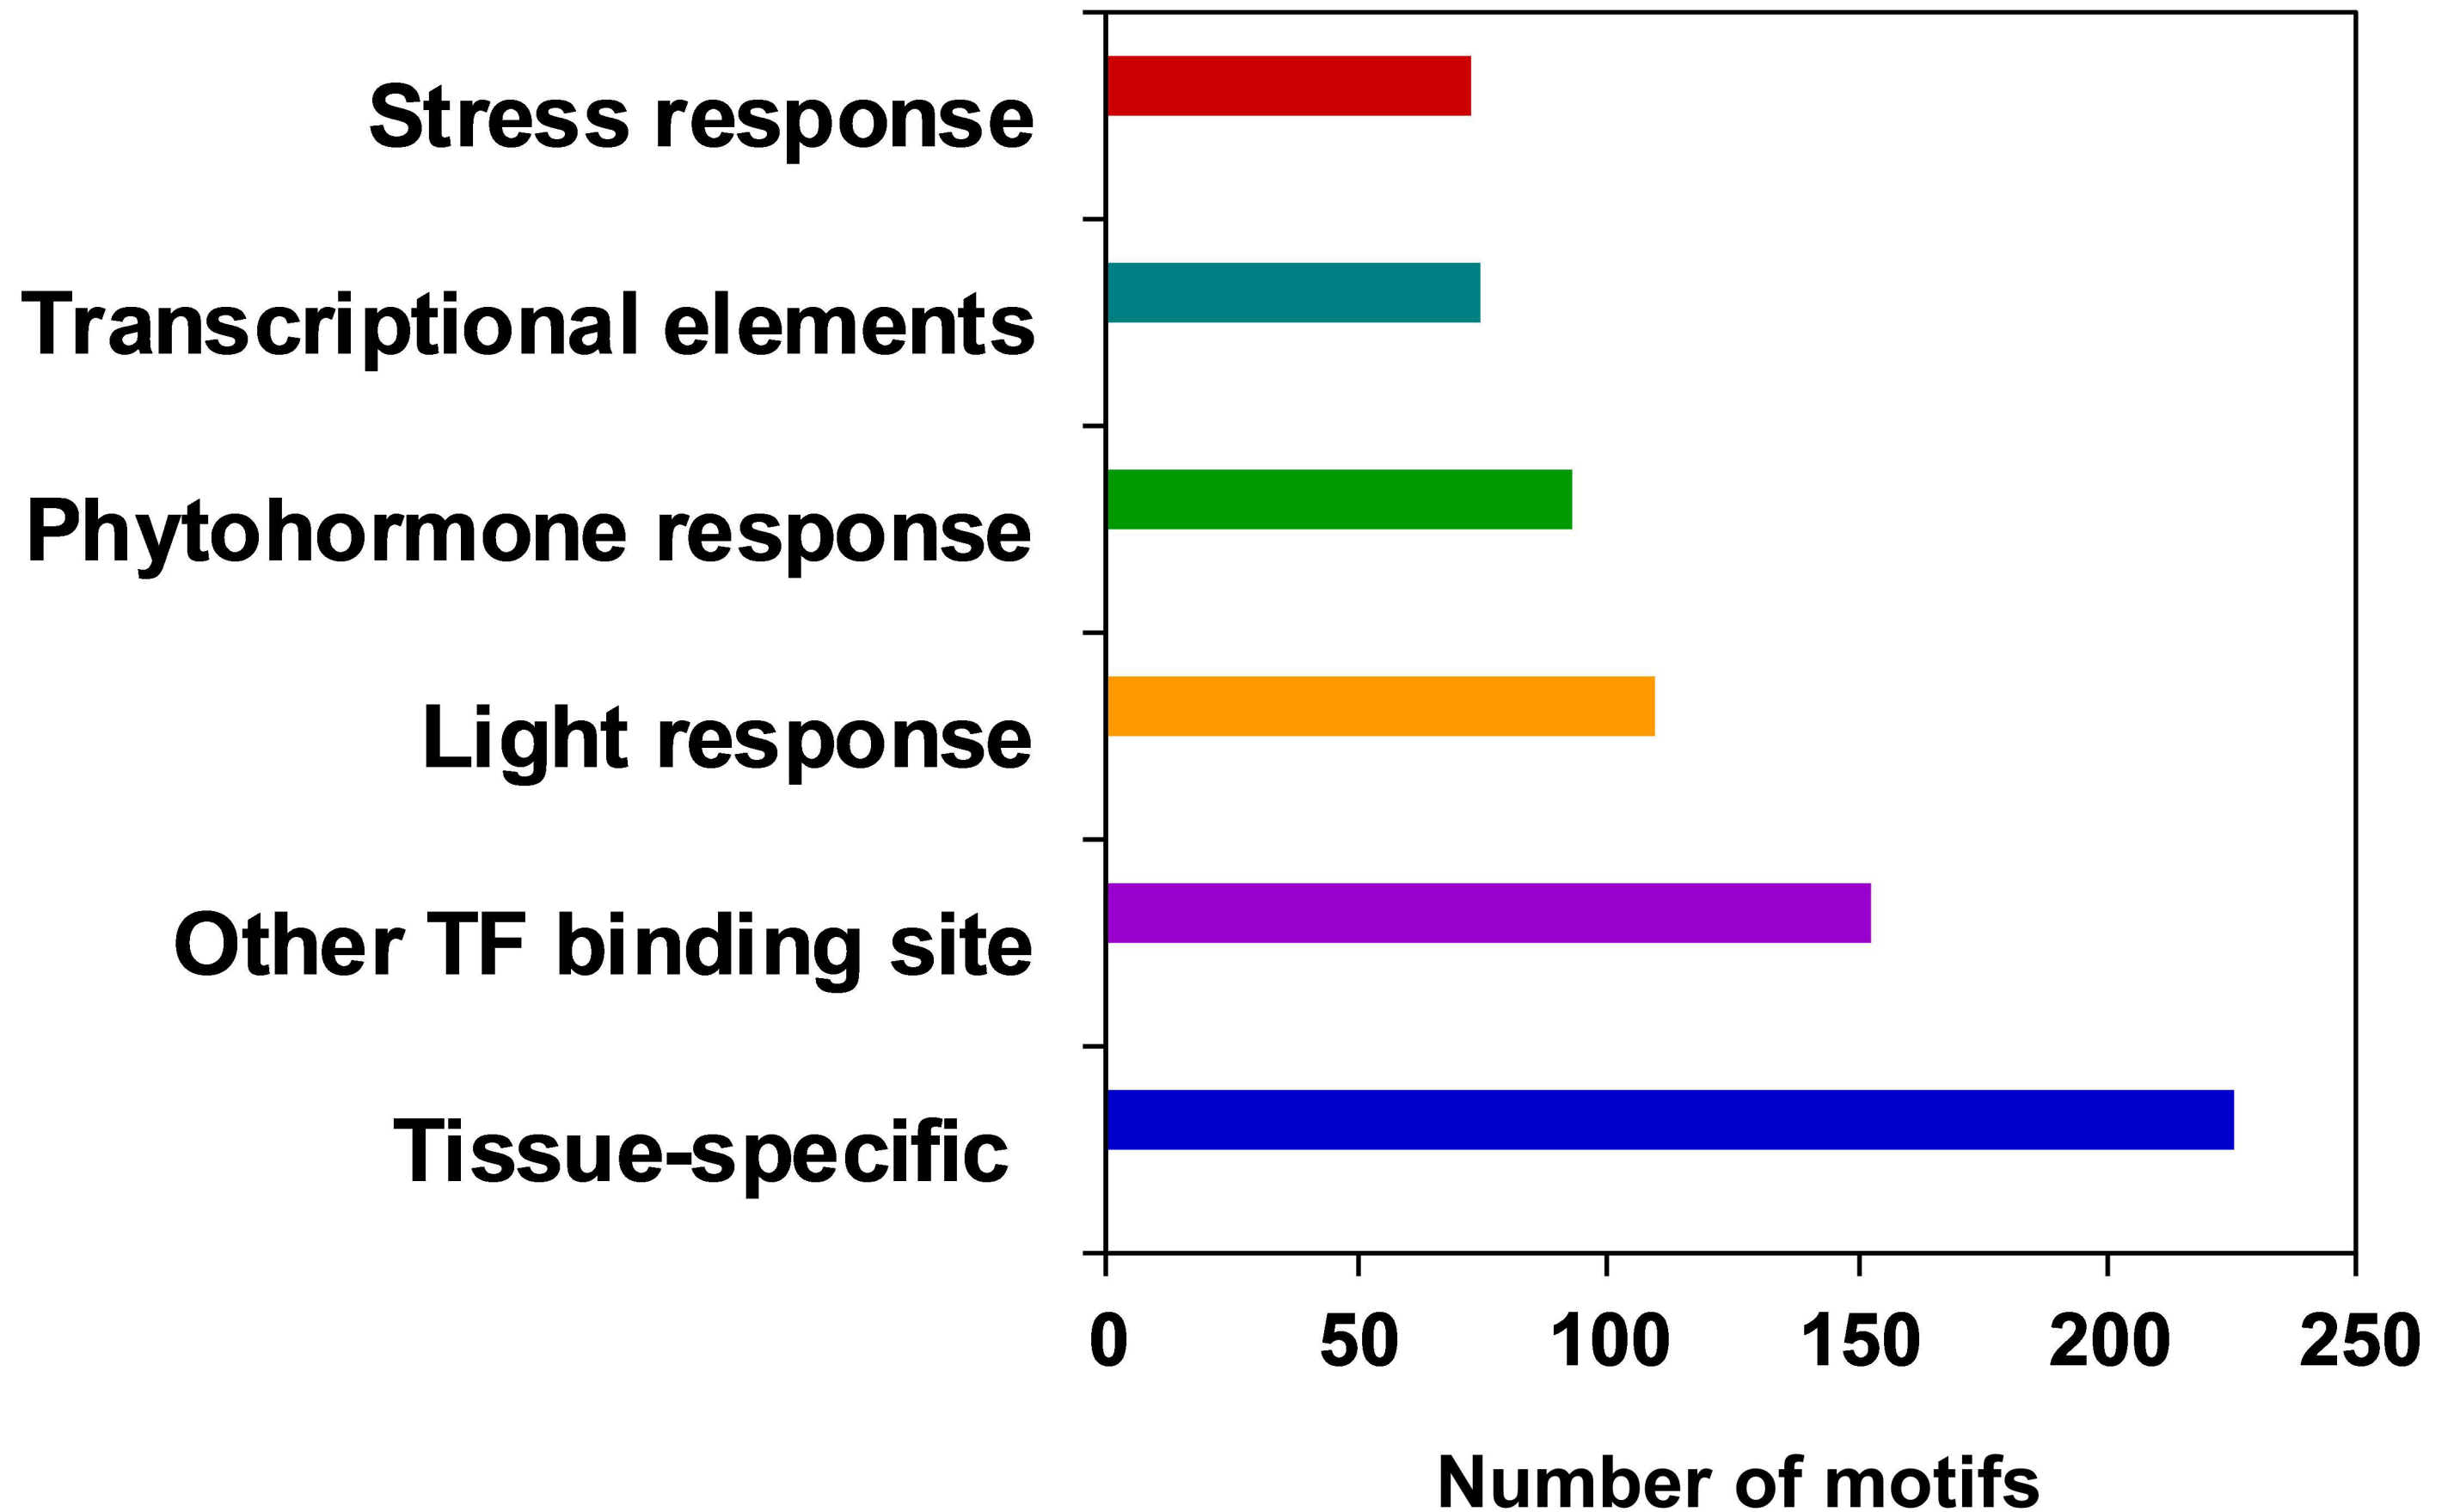



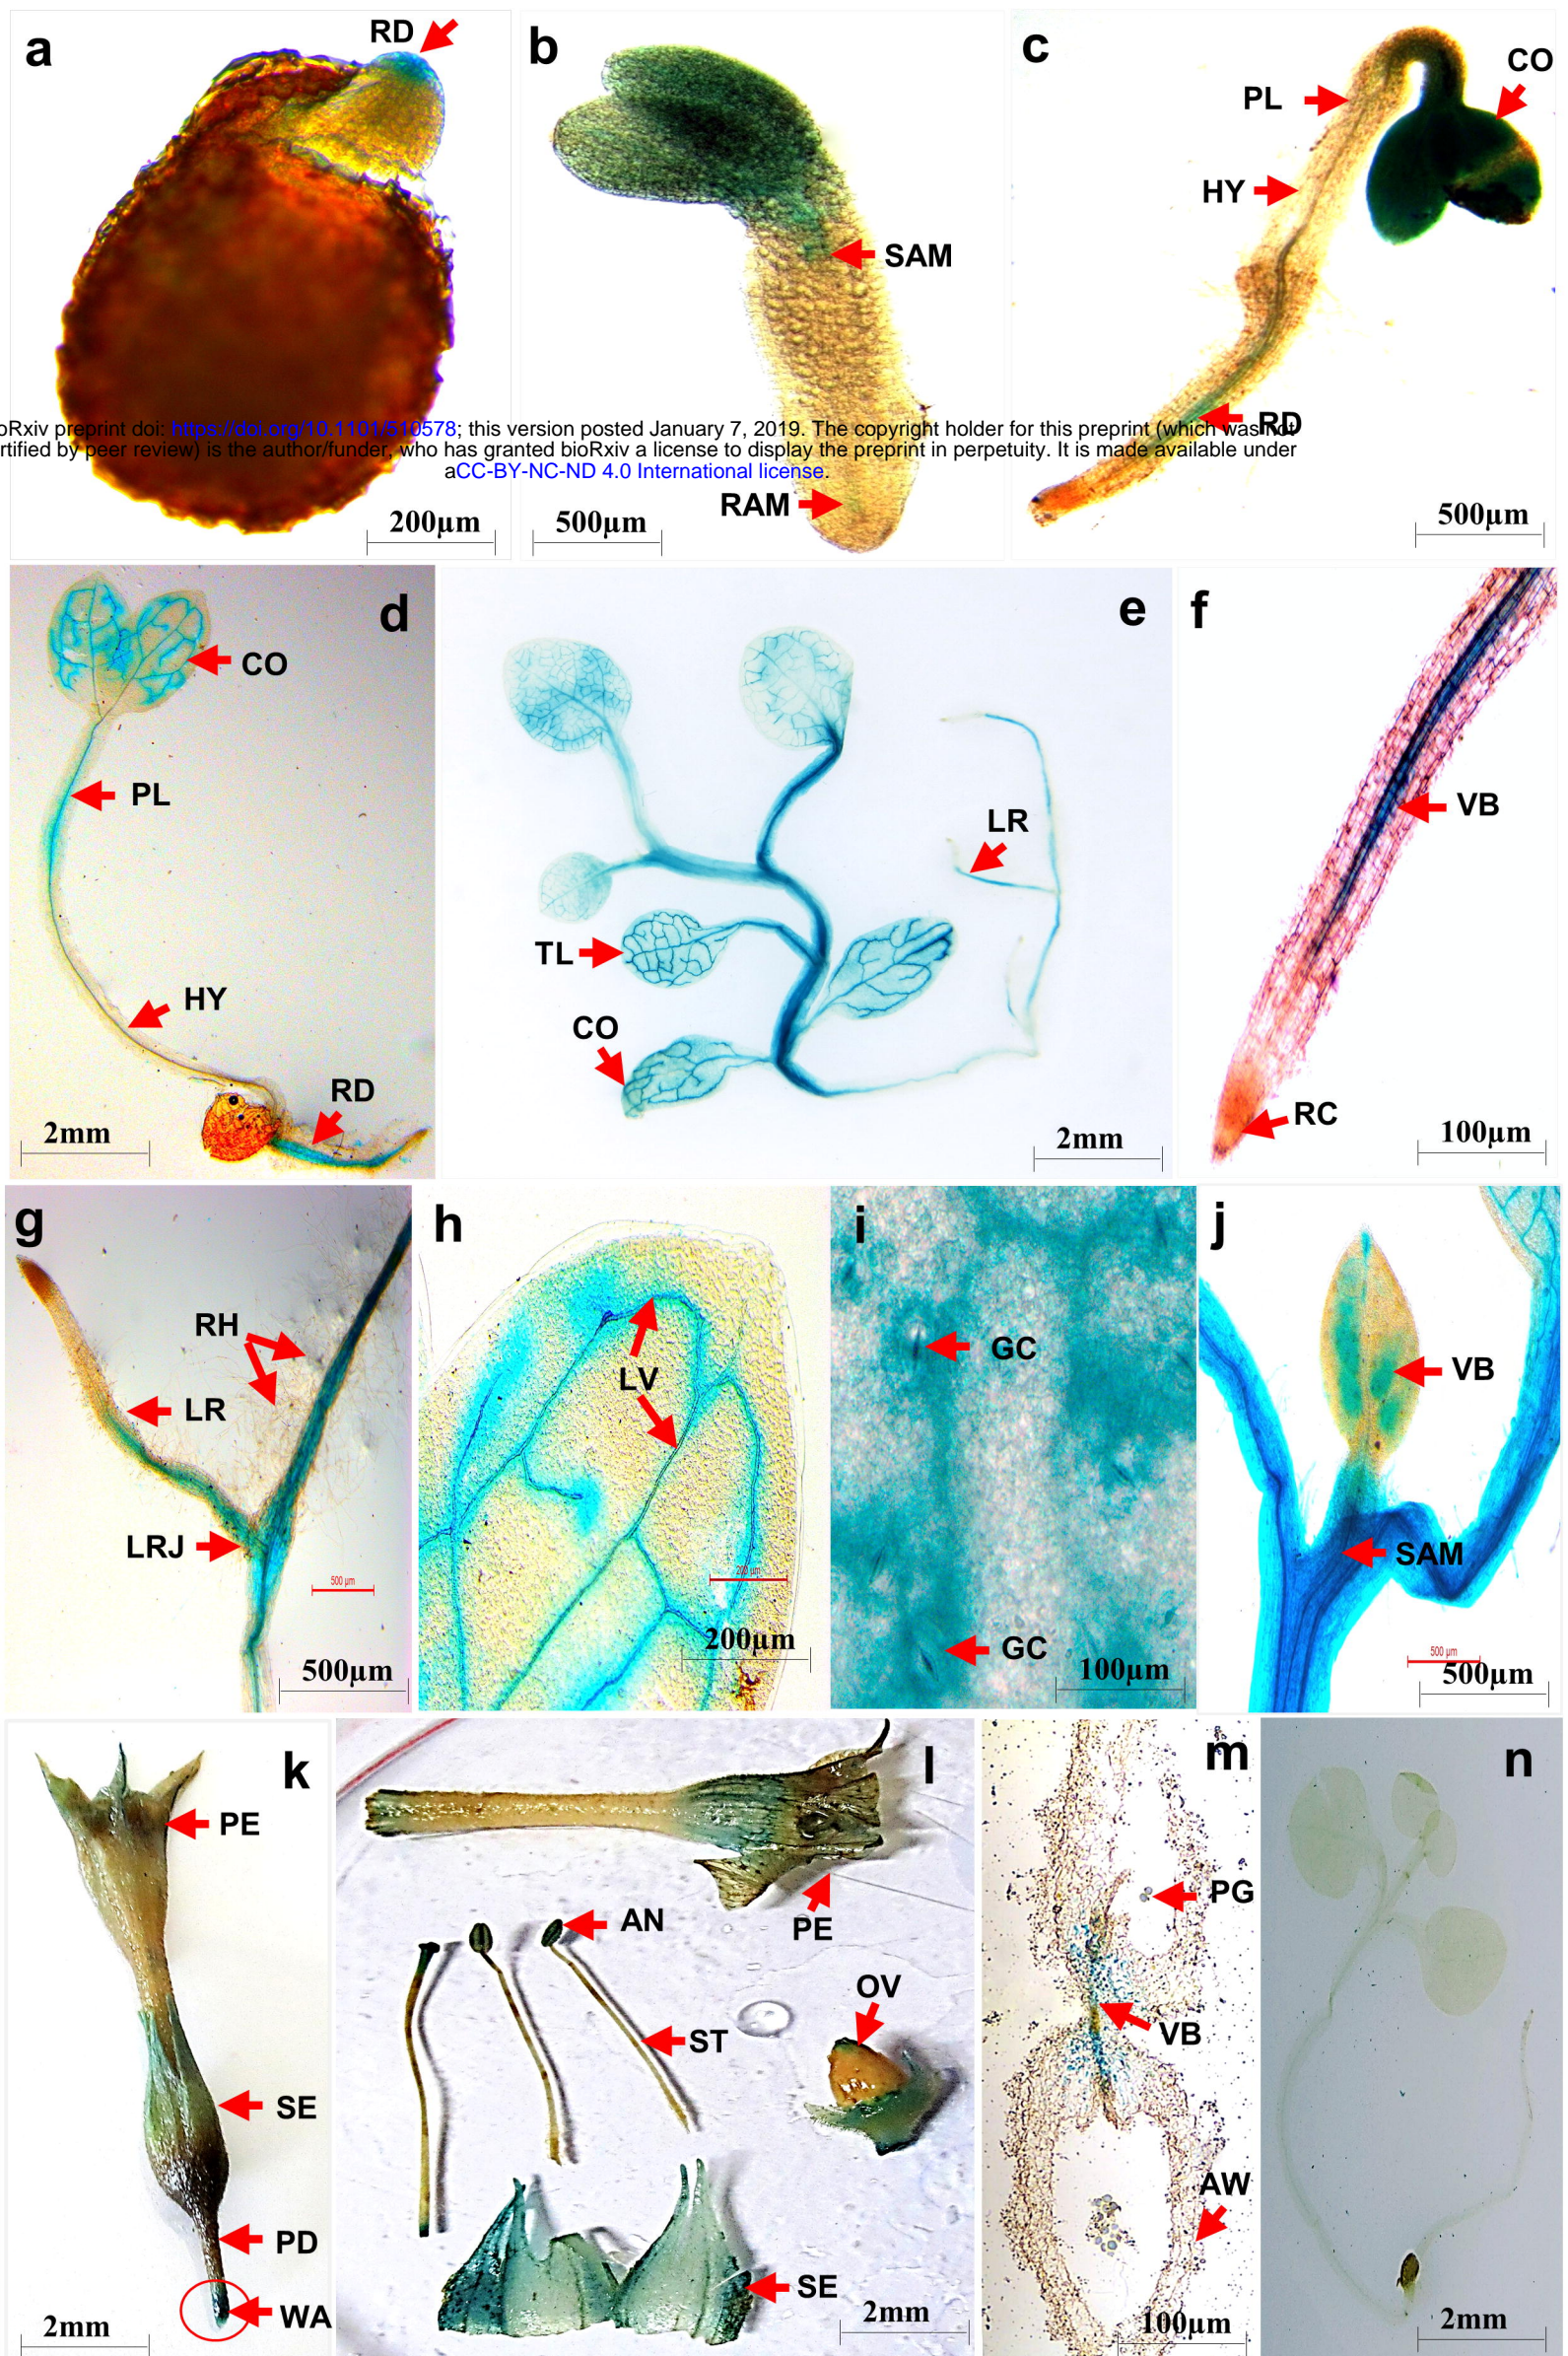



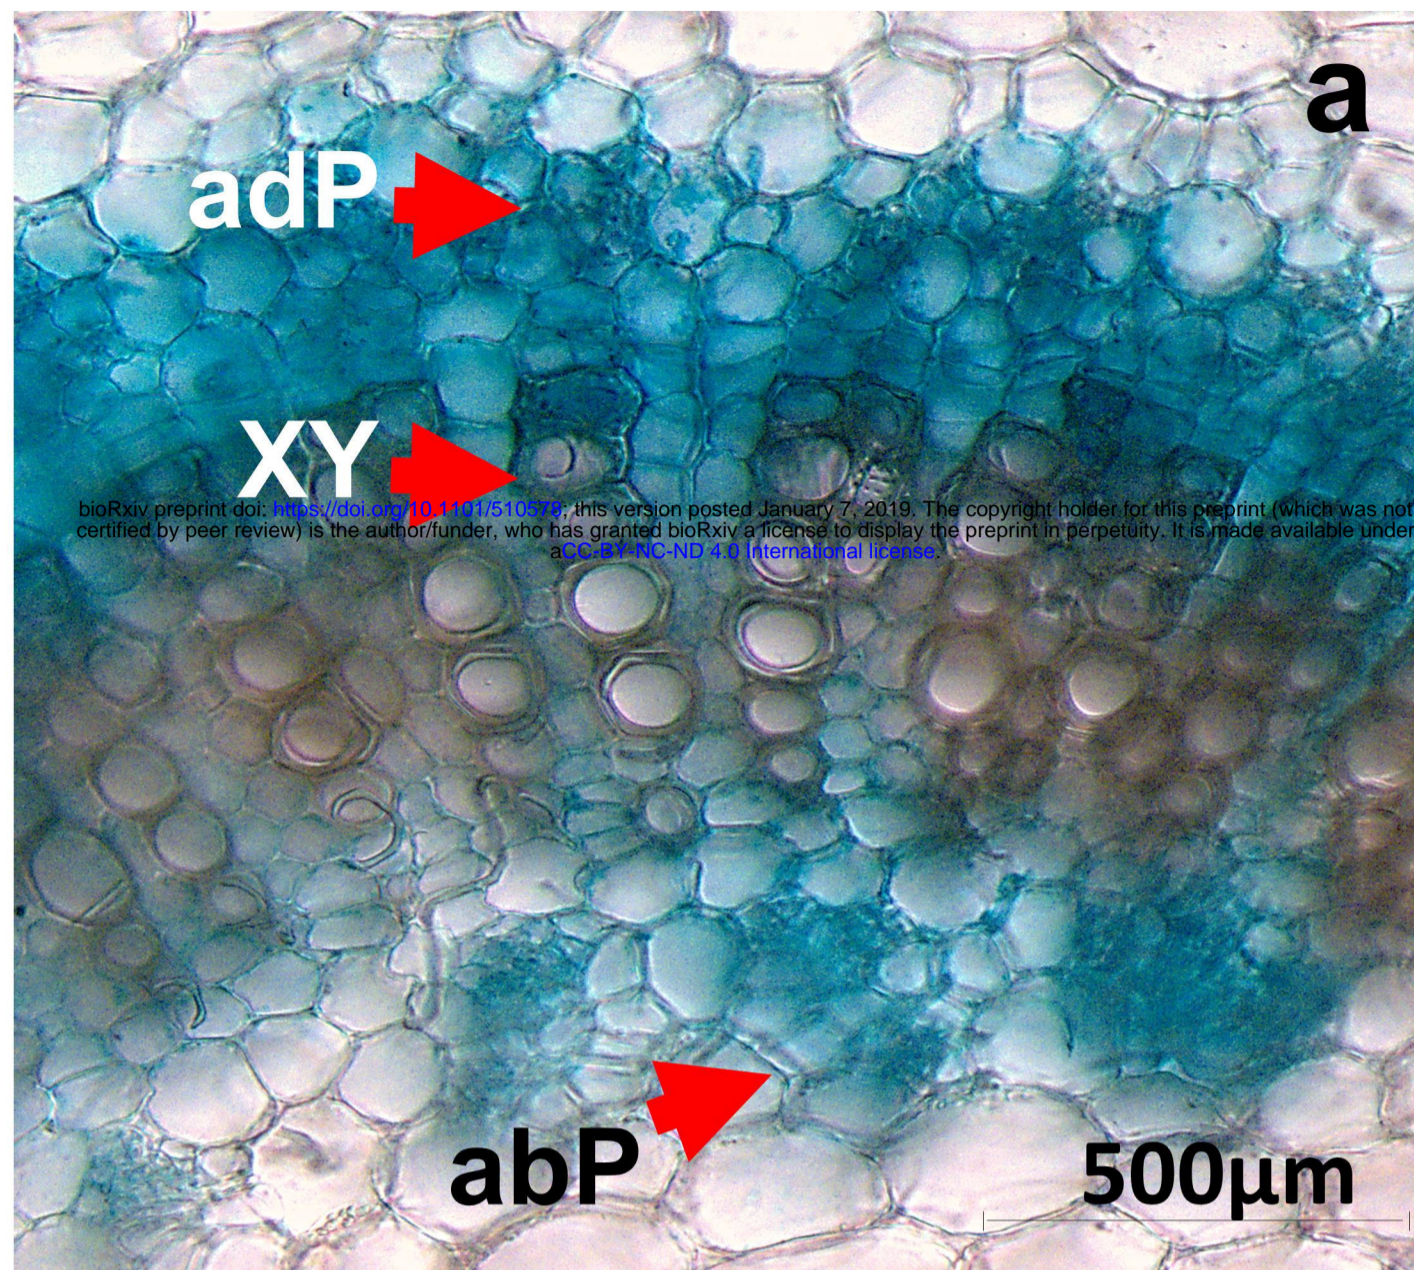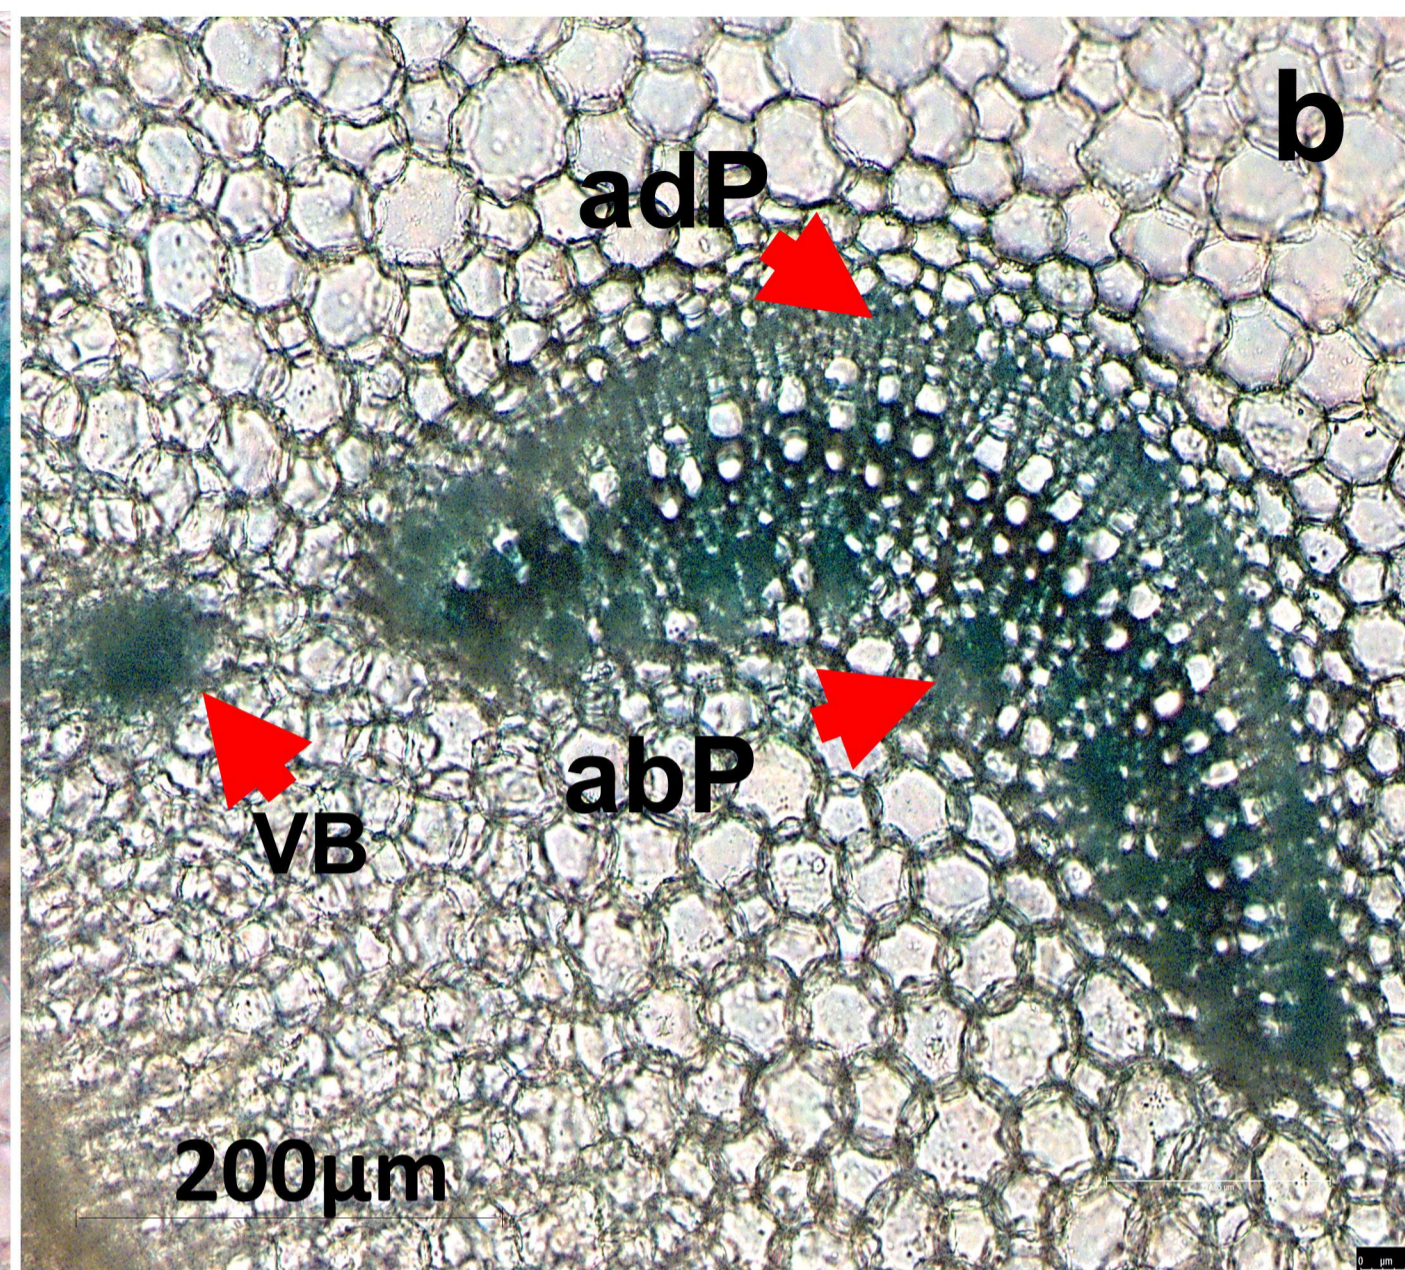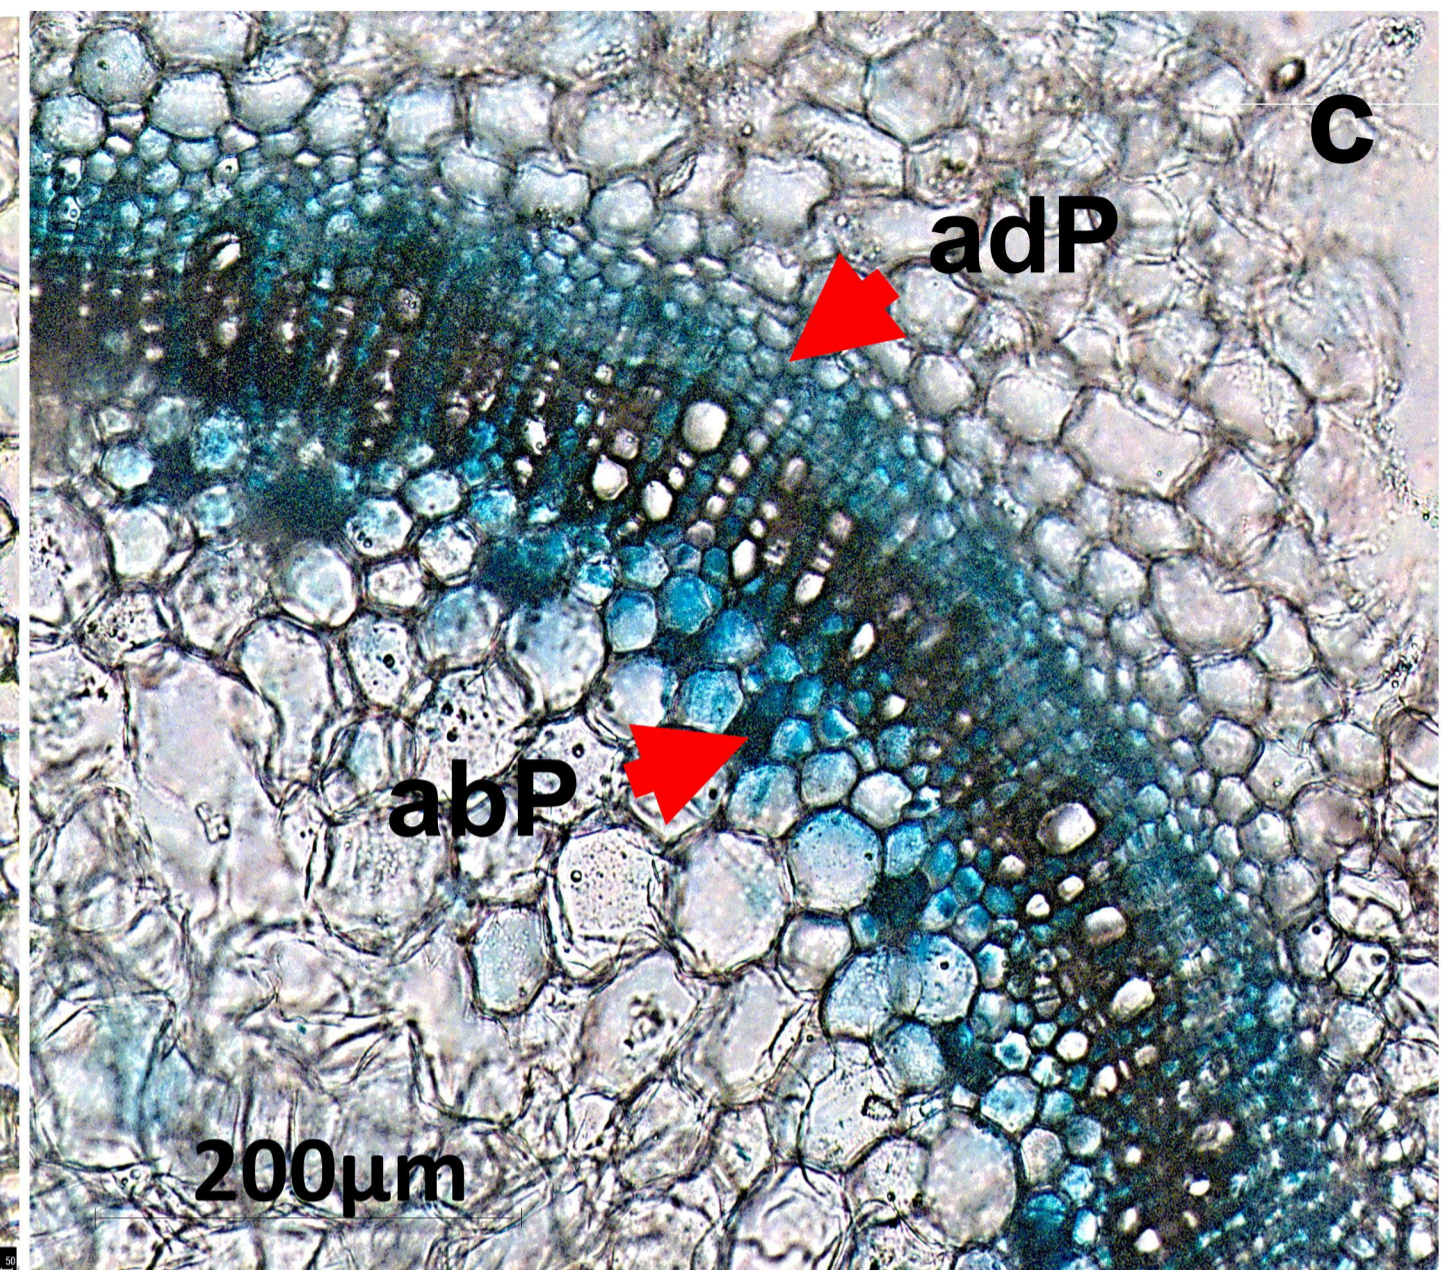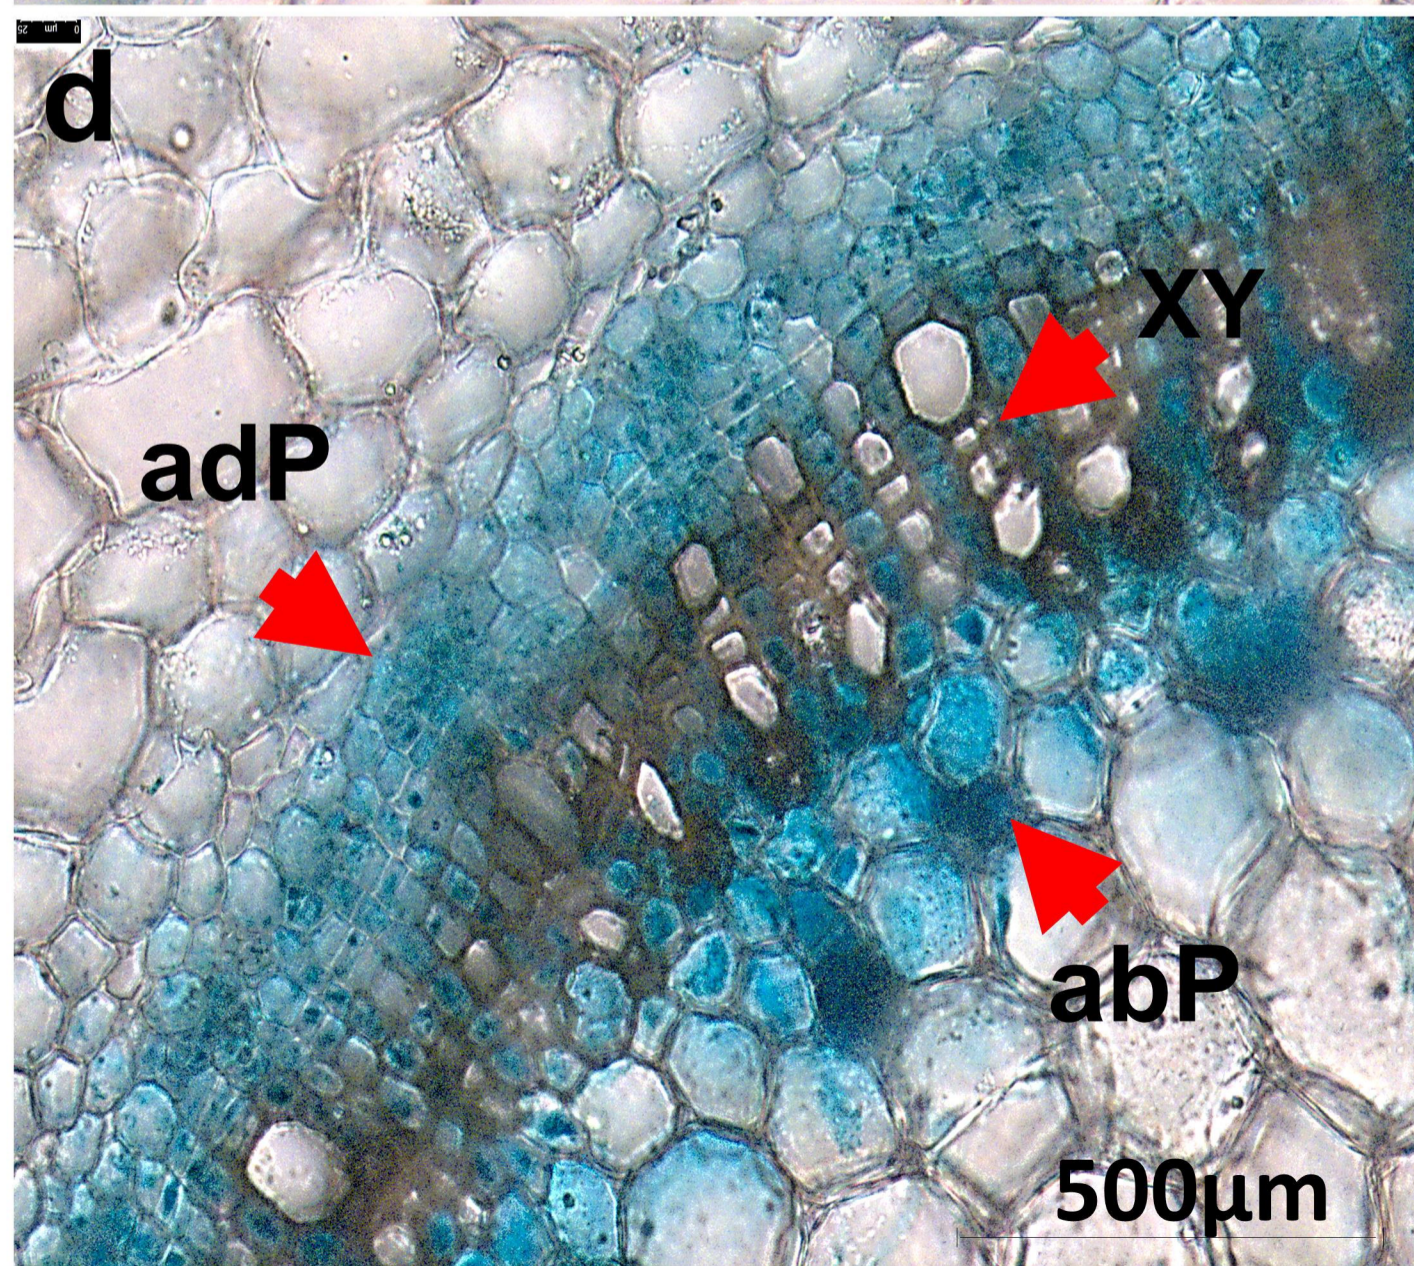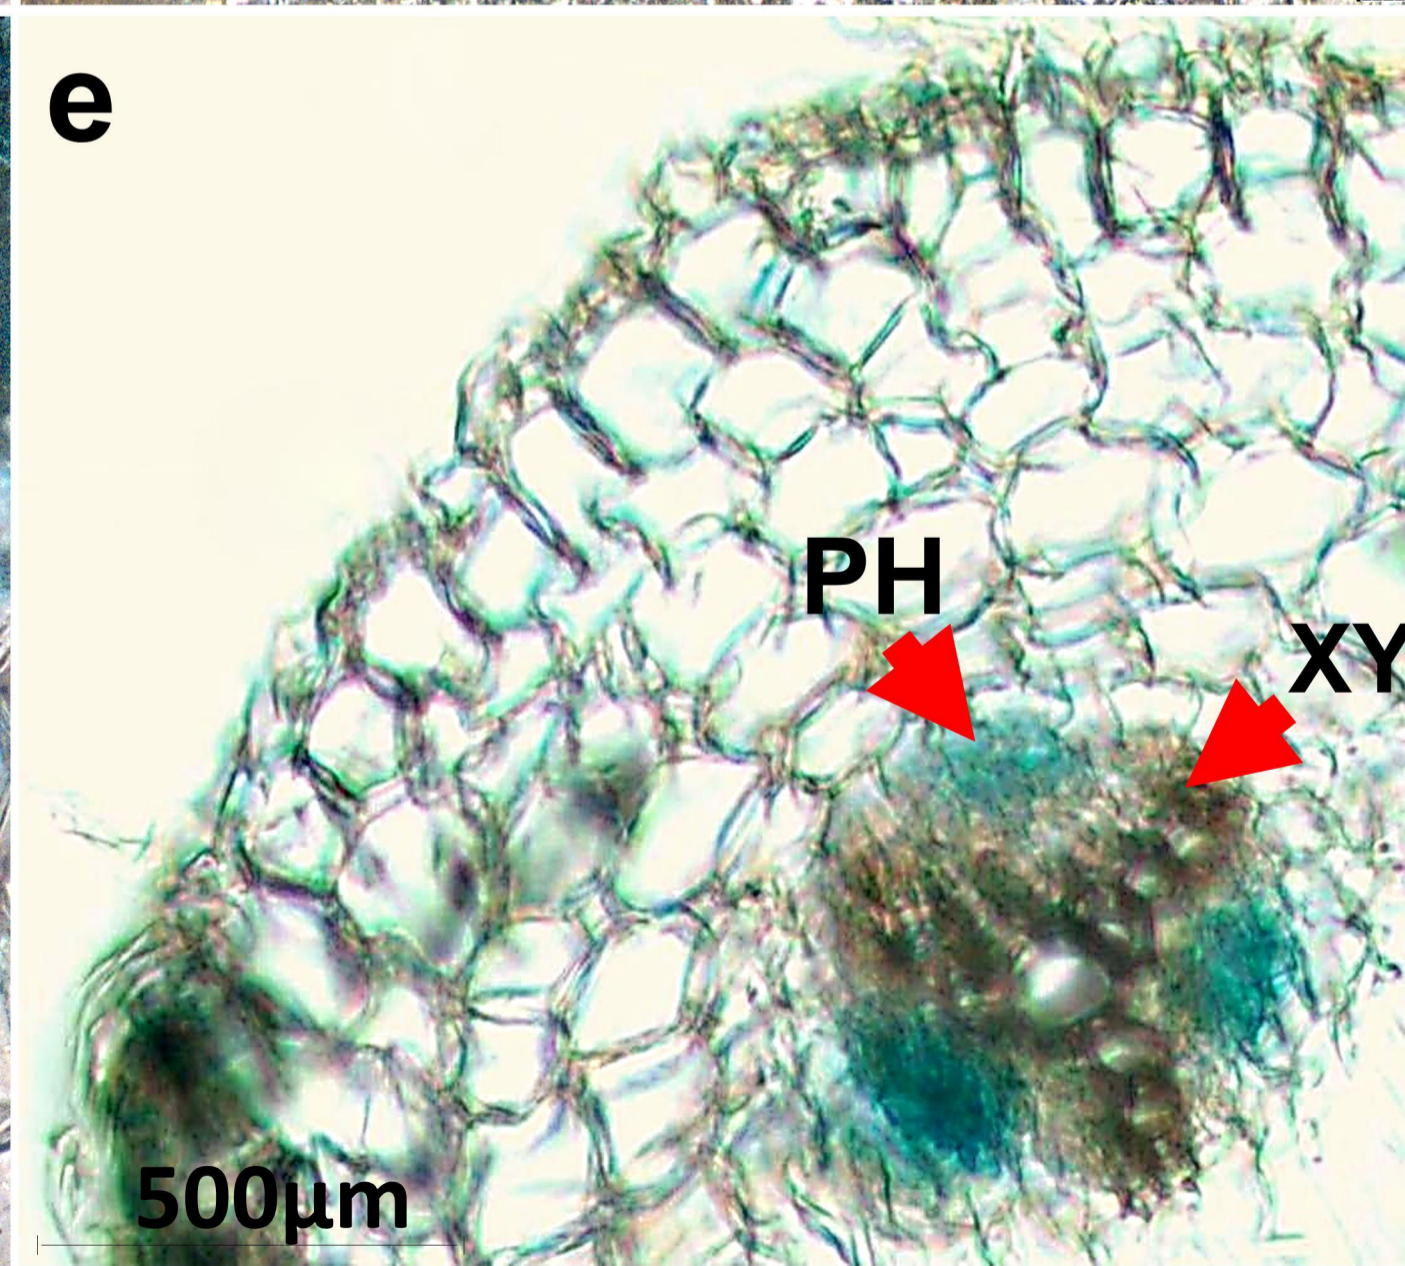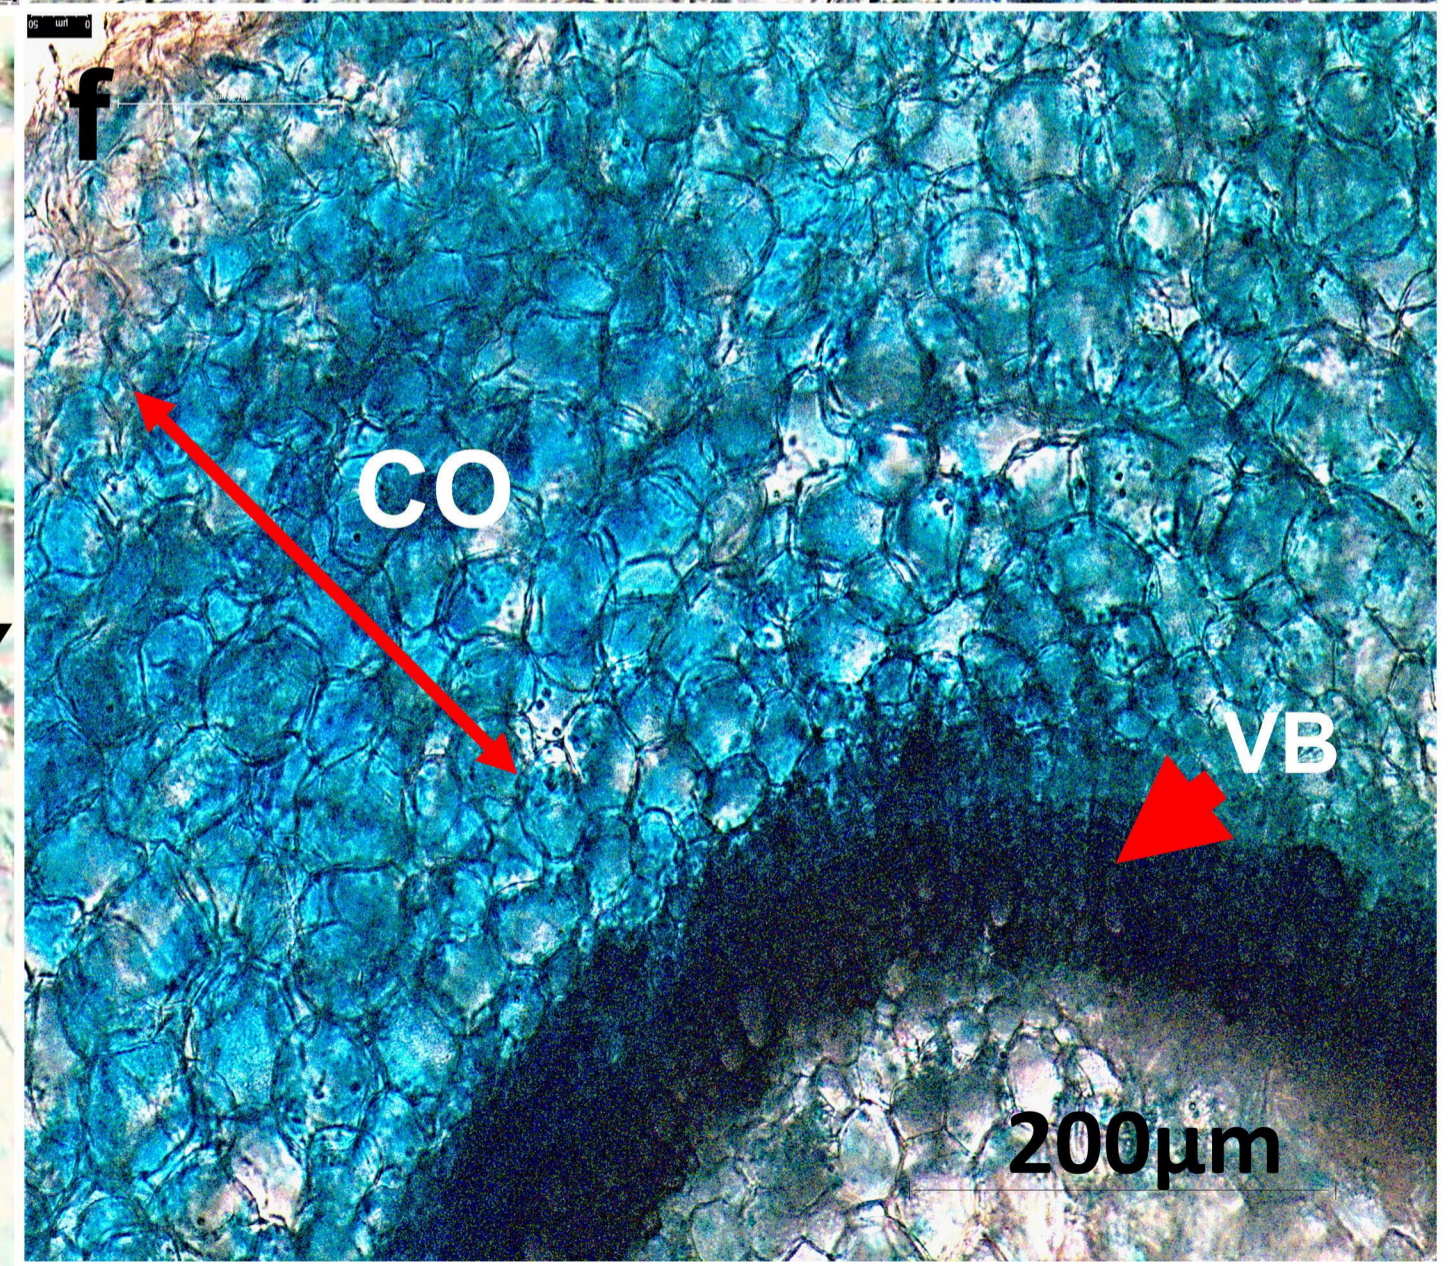



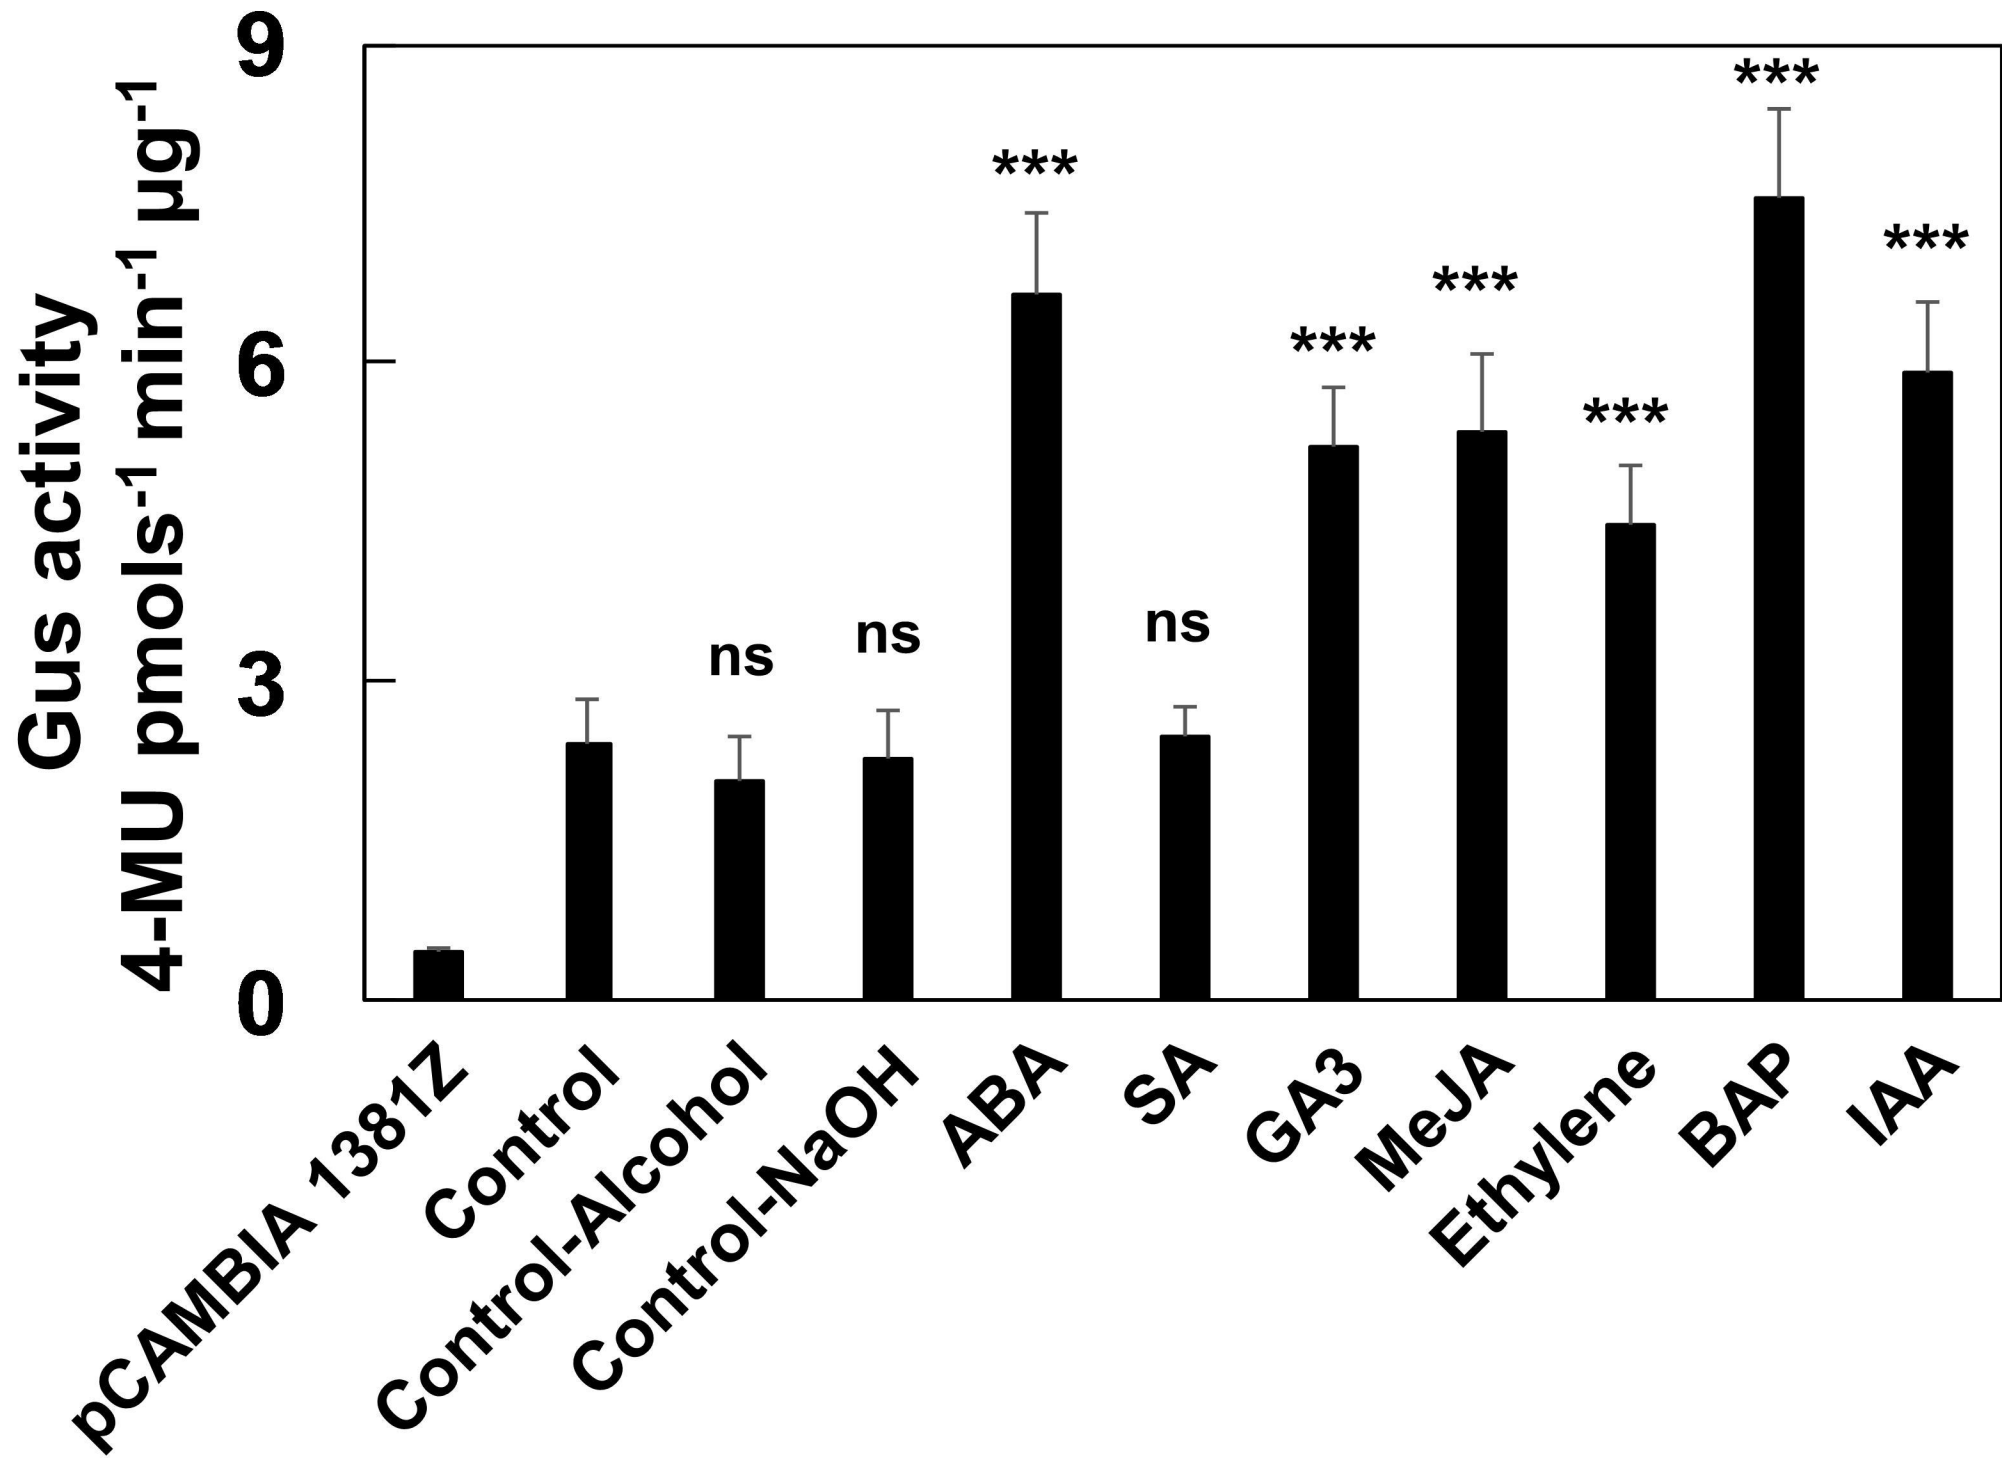

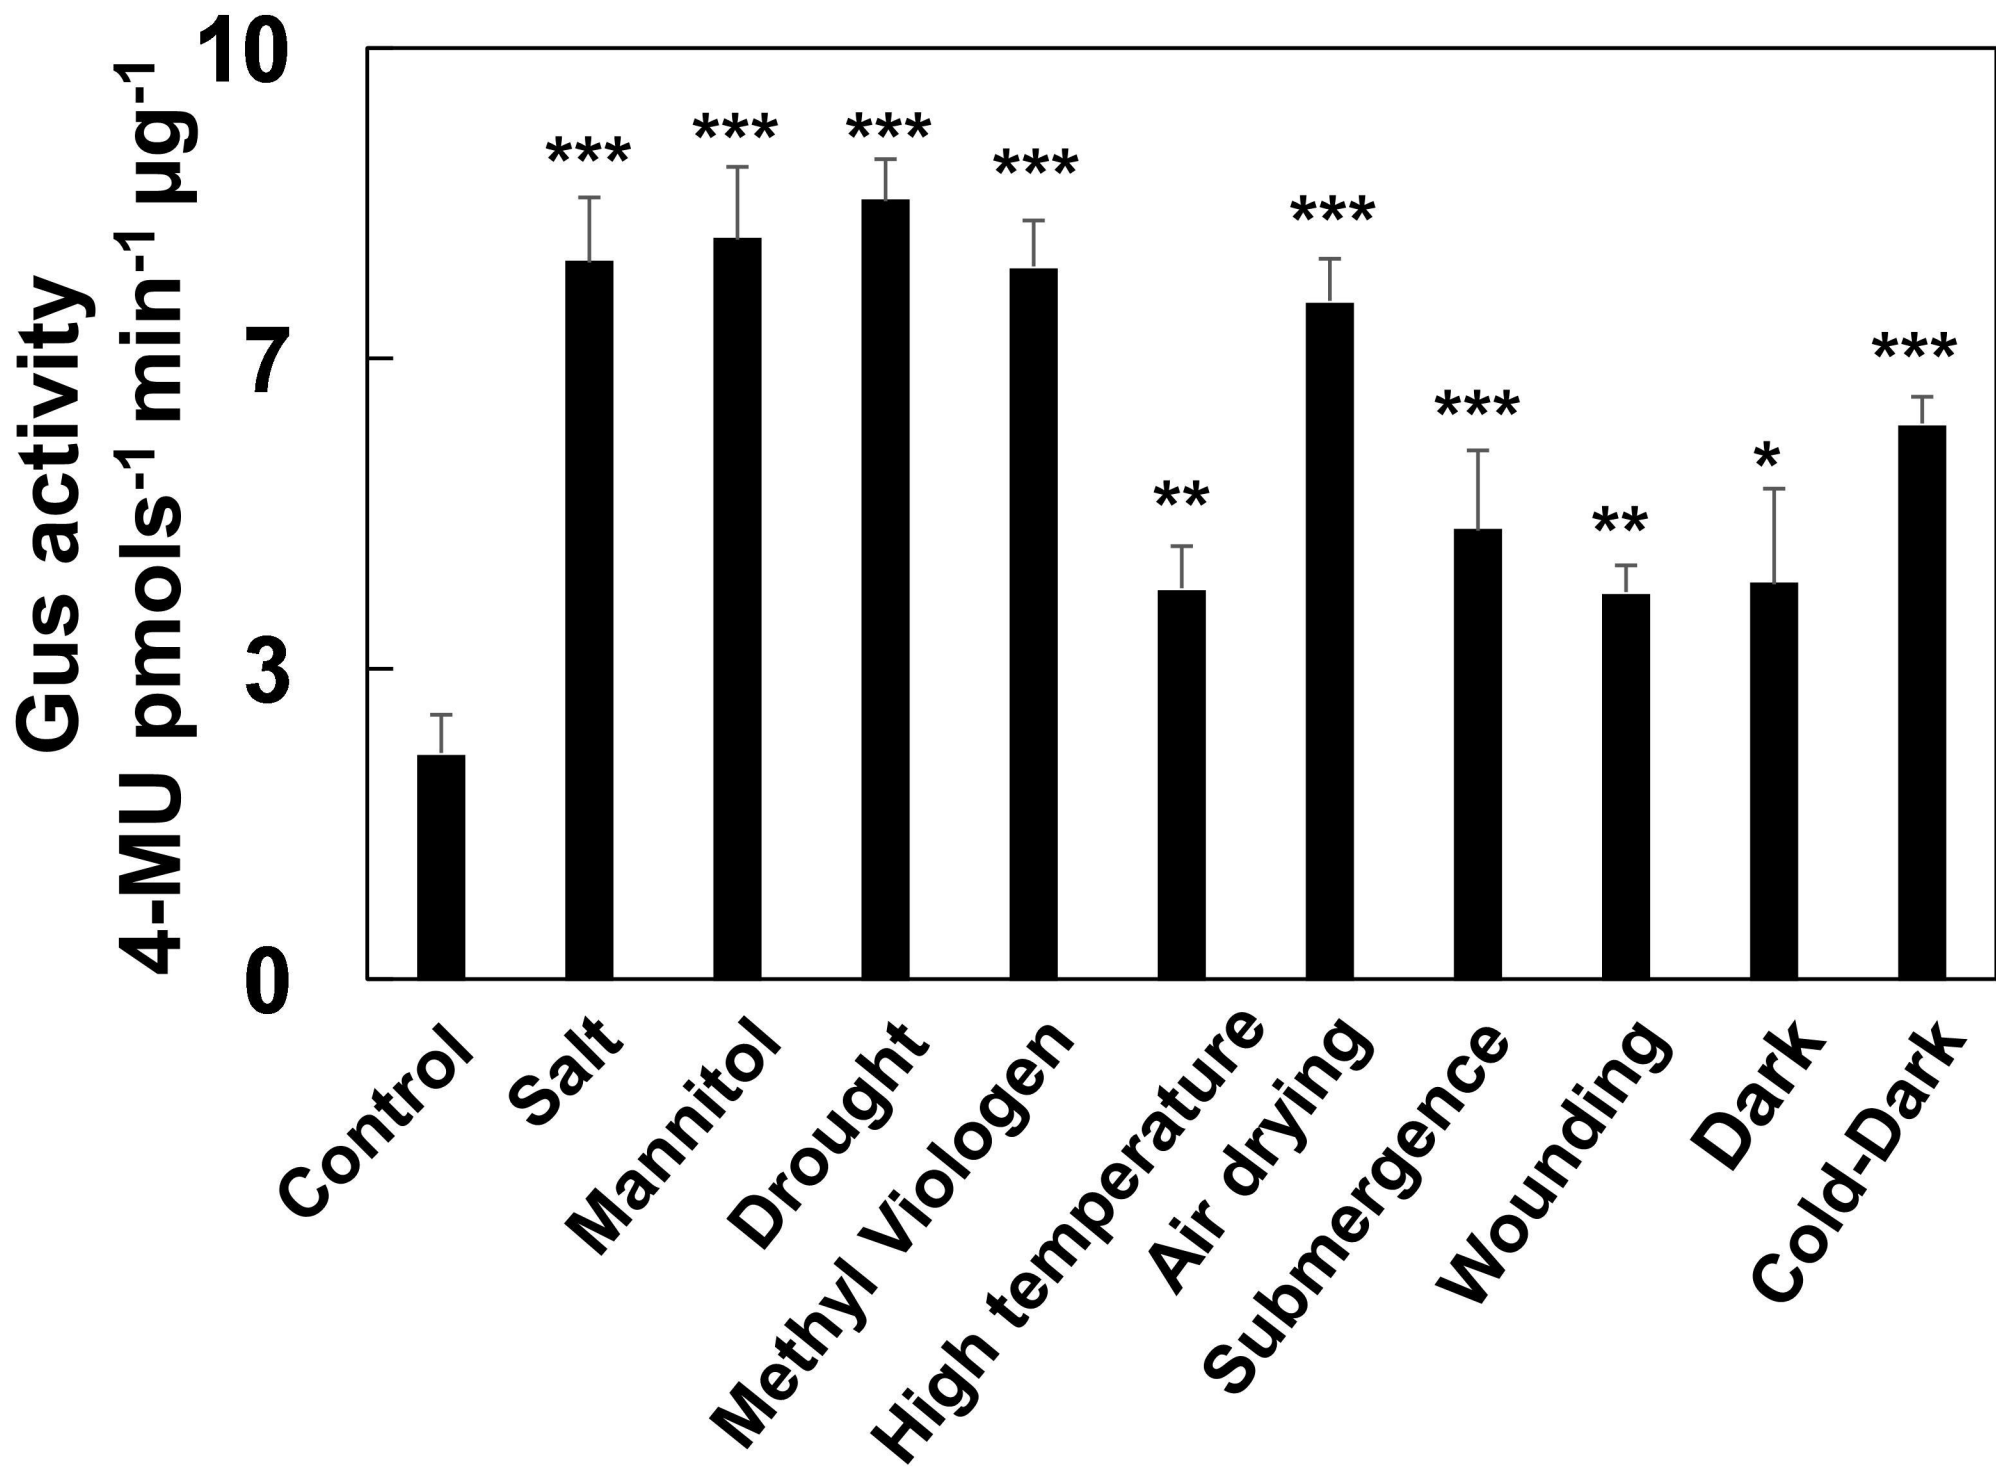

Source: https://www.biorxiv.org/content/10.1101/510578v1.full.pdf
